# Supplementary material for: Synthesis and Anticancer Evaluation of Novel 7-Aza-Coumarine-3-Carboxamides
Source: MDPI journal article supplement (doi:10.3390/ijms24129927), 2023-06-09
Supplement: s1 [file s1]

## Supplementary Materials

### Synthesis and Anticancer Evaluation of novel 7-aza-coumarine-3-carboxamides

Alexey V. Trifonov<sup>1</sup>, Almir S. Gazizov<sup>1\*</sup>, Anipa S. Tapalova<sup>2</sup>, Lyudmila K. Kibardina<sup>1</sup>, Nurbol O. Appazov<sup>2</sup>, Alexandra D. Voloshina<sup>1</sup>, Anastasiia S. Sapunova<sup>1</sup>, Anna P. Luybina<sup>1</sup>, Gulmira M. Abyzbekova<sup>2</sup>, Alexey B. Dobrynin<sup>1</sup>, Igor A. Litvinov<sup>1</sup>, Akerke K. Tauekel<sup>3</sup>, Sholpan O. Yespenbetova<sup>2</sup>, Alexander R. Burilov<sup>1</sup>, Michail A. Pudovik<sup>1</sup>

1 Arbuzov Institute of Organic and Physical Chemistry, FRC Kazan Scientific Center, Russian Academy of Science, Arbuzova Str., 8, Kazan 420088, Russia; xahter91@gmail.com (A.V.T.); kibardina@iopc.ru (L.K.K.); micrbi@iopc.ru (A.D.V.); luybina@iopc.ru (A.P.L.); aldo@iopc.ru (A.B.D.); litvinov@iopc.ru (I.A.L.); burilov@iopc.ru (A.R.B.); pudovik@iopc.ru (M.A.P.)

2 Korkyt Ata Kyzylorda University, Aiteke Bi Street, 29A, Kyzylorda 120014, Kazakhstan; anipa52@mail.ru (A.S.T.); nurasar.82@mail.ru (N.O.A.); abizgul@mail.ru (G.M.A.); sholpan-sultan@mail.ru (S.O.Y.)

3 Department of Oil, Chemistry and Nanotechnology, Kazan National Research Technological University, Karl Marx Str., 68, Kazan 420015, Russia

\* Correspondence: agazizov@iopc.ru

### Table of contents

S2 §1. Synthesis of potassium 5-(hydroxymethyl)-8-methyl-2-oxo-2H-pyrano[2,3-c]pyridine-3-carboxylate S3–8 §2. Single crystal X-ray crystallography

S8-70 §3. <sup>1</sup>H and <sup>13</sup>C NMR spectra of the compounds

## §2. Synthesis of potassium 5-(hydroxymethyl)-8-methyl-2-oxo-2H-pyrano[2,3-c]pyridine-3-carboxylate

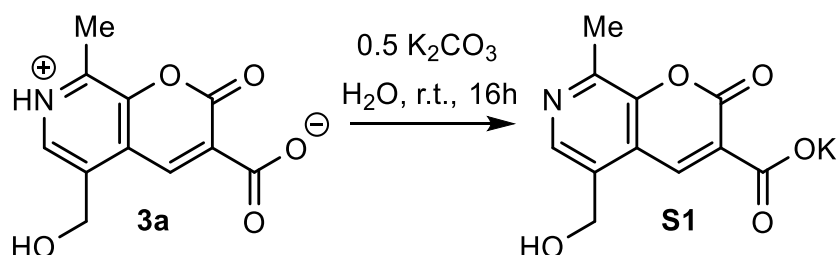

An aqueous solution of the acid **3a** (0.24 g, 1.02 mmol) and a potassium carbonate (0.07 g, 0.51 mmol) was stirred at room temperature for 16 hours. The solvent was removed from the reaction mixture to give title compound as a white solid, that did not require additional purification. Yield: 96% (0.27g); mp: > 300 °C. IR ( $\nu$  cm<sup>-1</sup>): 569, 597, 652, 962, 746, 772, 815, 839, 945, 980, 1012, 1072, 1098, 1139, 1207, 1268, 1286, 1331, 1352, 1415, 1608, 1627, 1662, 1756, 2863, 3252, 3362, 3535. <sup>1</sup>H NMR (DMSO-d<sub>6</sub>)  $\delta$  ppm: 2.53 (s, 3H, CH<sub>3</sub>), 4.69 (s, 2H, CH<sub>2</sub>OH), 5.66 (br.s, 1H, CH<sub>2</sub>OH), 7.96 (s, 1H, CH<sub>arom</sub>), 8.22 (s, 1H, CH). <sup>13</sup>C NMR (DMSO-d<sub>6</sub>)  $\delta$  ppm: 18.94, 58.56, 123.40, 131.28, 132.51, 136.00, 142.56, 145.86, 147.11, 158.13, 165.35. MALDI TOF - MS  $m/z$ : 273.9 [M]<sup>+</sup>. Calculated for C<sub>11</sub>H<sub>8</sub>KNO<sub>5</sub>, %: C, 48.35; H, 2.95; K, 14.31, N, 5.13. Found, %: C, 48.55; H, 3.05; K, 14.03, N, 5.21.

The structure of the salt **S1** was additionally proved by x-ray analysis.

## §2. Single crystal X-ray crystallography

**Table S1.** Data collection and selected refinement parameters for the obtained complexes.

|                                                                                                                         | <b>4</b>                                                                           | <b>5</b>                                        | <b>7a</b>                                                       |
|-------------------------------------------------------------------------------------------------------------------------|------------------------------------------------------------------------------------|-------------------------------------------------|-----------------------------------------------------------------|
| CCDC number                                                                                                             | 2266952                                                                            | 2266953                                         | 2266954                                                         |
| Chemical formula                                                                                                        | C <sub>24</sub> H <sub>29</sub> NO <sub>5</sub> , C <sub>2</sub> H <sub>6</sub> OS | C <sub>13</sub> H <sub>15</sub> NO <sub>4</sub> | C <sub>17</sub> H <sub>13</sub> ClN <sub>2</sub> O <sub>3</sub> |
| M <sub>r</sub>                                                                                                          | 489.61                                                                             | 249.26                                          | 328.74                                                          |
| Crystal system, space group                                                                                             | Triclinic, <i>P</i> -1                                                             | Orthorhombic, <i>Pbca</i>                       | Triclinic, <i>P</i> -1                                          |
| Temperature (K)                                                                                                         | 110                                                                                | 296                                             | 100                                                             |
| <i>a</i> , <i>b</i> , <i>c</i> (Å)                                                                                      | 9.4356(7),<br>10.3116(6),<br>14.6168(10)                                           | 12.1992(9),<br>14.0296(10),<br>14.0897(12)      | 7.3406(4),<br>12.9361(7),<br>15.9503(8)                         |
| $\alpha$ , $\beta$ , $\gamma$ (°)                                                                                       | 78.578(3),<br>72.115(2),<br>72.115(2)                                              | 90,<br>90,<br>90                                | 91.274(2),<br>99.282(2),<br>104.960(2),                         |
| <i>V</i> (Å <sup>3</sup> )                                                                                              | 1246.75(15)                                                                        | 2411.5(3)                                       | 1440.88(13)                                                     |
| <i>Z</i>                                                                                                                | 2                                                                                  | 8                                               | 4                                                               |
| $\rho_{\text{calc}}$ (mg/mm <sup>3</sup> )                                                                              | 1.304                                                                              | 1.373                                           | 1.515                                                           |
| $\mu$ (mm <sup>-1</sup> )                                                                                               | 0.171                                                                              | 0.102                                           | 0.283                                                           |
| Crystal size (mm)                                                                                                       | 0.10 x 0.30 x 0.34                                                                 | 0.30 x 0.30 x 0.35                              | 0.10 x 0.17 x 0.23                                              |
| <i>T</i> <sub>min</sub> , <i>T</i> <sub>max</sub>                                                                       | 0.6774, 0.7461                                                                     | 0.6774, 0.7461                                  | 0.5232, 0.7457                                                  |
| No. of measured, independent and observed [ <i>I</i> > 2 $\sigma$ ( <i>I</i> )] reflections                             | 66018, 7268, 6113                                                                  | 61026, 3681, 2920                               | 71292, 7125, 5321                                               |
| <i>R</i> <sub>int</sub>                                                                                                 | 0.054                                                                              | 0.057                                           | 0.128                                                           |
| $\theta$ range for data collection (°)                                                                                  | 2.1 < $\theta$ < 30.0                                                              | 2.6 < $\theta$ < 30.6                           | 2.0 < $\theta$ < 28.3                                           |
| <i>R</i> [ <i>F</i> <sup>2</sup> > 2 $\sigma$ ( <i>F</i> <sup>2</sup> )], <i>wR</i> ( <i>F</i> <sup>2</sup> ), <i>S</i> | 0.0359, 0.1015, 1.04                                                               | 0.0510, 0.1585, 1.11                            | 0.0624, 0.1633, 1.04                                            |
| No. of reflections                                                                                                      | 7268                                                                               | 3681                                            | 7125                                                            |
| No. of parameters                                                                                                       | 322                                                                                | 168                                             | 417                                                             |
| Largest diff. peak and hole (e Å <sup>-3</sup> )                                                                        | 0.48, -0.27                                                                        | 0.51, -0.25                                     | 0.72, -0.44                                                     |

|                                                                                                                | <b>7f</b>                                                            | <b>8b</b>                                                                         | <b>S1</b>                                        |
|----------------------------------------------------------------------------------------------------------------|----------------------------------------------------------------------|-----------------------------------------------------------------------------------|--------------------------------------------------|
| CCDCnumber                                                                                                     | 2266955                                                              | 2266956                                                                           | 2266957                                          |
| Chemical formula                                                                                               | C <sub>23</sub> H <sub>18</sub> ClN <sub>2</sub> O <sub>3</sub> , Cl | C <sub>11</sub> H <sub>8</sub> NO <sub>5</sub> , C <sub>6</sub> H <sub>14</sub> N | C <sub>11</sub> H <sub>10</sub> KNO <sub>6</sub> |
| M <sub>r</sub>                                                                                                 | 441.29                                                               | 334.37                                                                            | 291.30                                           |
| Crystal system, space group                                                                                    | Monoclinic, <i>P</i> 2 <sub>1</sub> /c                               | Monoclinic, <i>P</i> 2 <sub>1</sub> /c                                            | Triclinic, <i>P</i> -1                           |
| Temperature (K)                                                                                                | 110                                                                  | 296                                                                               | 300                                              |
| <i>a</i> , <i>b</i> , <i>c</i> (Å)                                                                             | 14.0682(11),<br>8.0618(6),<br>18.6999(15)                            | 13.7630(9),<br>6.7600(4),<br>17.1279(11)                                          | 6.5416(4),<br>8.6276(5),<br>10.6404(6)           |
| $\alpha$ , $\beta$ , $\gamma$ (°)                                                                              | 90,<br>107.846(3),<br>90                                             | 90,<br>96.677(2),<br>90                                                           | 87.983(2),<br>89.806(2),<br>69.503(2),           |
| <i>V</i> (Å <sup>3</sup> )                                                                                     | 2018.8(3)                                                            | 1582.74(17)                                                                       | 562.13(6)                                        |
| <i>Z</i>                                                                                                       | 4                                                                    | 4                                                                                 | 2                                                |
| $\rho_{\text{calc}}$ (mg/mm <sup>3</sup> )                                                                     | 1.452                                                                | 1.403                                                                             | 1.721                                            |
| $\mu$ (mm <sup>-1</sup> )                                                                                      | 0.350                                                                | 0.104                                                                             | 0.497                                            |
| Crystal size (mm)                                                                                              | 0.03 x 0.11 x 0.13                                                   | 0.16 x 0.22 x 0.23                                                                | 0.12 x 0.17 x 0.39                               |
| <i>T</i> <sub>min</sub> , <i>T</i> <sub>max</sub>                                                              | 0.6855, 0.7128                                                       | 0.3157, 0.7474                                                                    | 0.6831, 0.7417                                   |
| No. of measured, independent and observed [ <i>I</i> > 2σ ( <i>I</i> )] reflections                            | 88540, 5013, 3662                                                    | 21831, 3358, 3008                                                                 | 24728, 2174, 2099                                |
| <i>R</i> <sub>int</sub>                                                                                        | 0.128                                                                | 0.064                                                                             | 0.042                                            |
| $\theta$ range for data collection (°)                                                                         | 2.3 < $\theta$ < 28.3                                                | 2.7 < $\theta$ < 27.0                                                             | 1.9 < $\theta$ < 26.0                            |
| <i>R</i> [ <i>F</i> <sup>2</sup> > 2σ( <i>F</i> <sup>2</sup> )], <i>wR</i> ( <i>F</i> <sup>2</sup> ), <i>S</i> | 0.0358, 0.1041, 0.93                                                 | 0.0439, 0.1247, 1.09                                                              | 0.0249, 0.0671, 1.08                             |
| No. of reflections                                                                                             | 5013                                                                 | 3358                                                                              | 2174                                             |
| No. of parameters                                                                                              | 276                                                                  | 220                                                                               | 185                                              |
| Largest diff. peak and hole (e Å <sup>-3</sup> )                                                               | 0.33, -0.39                                                          | 0.30, -0.26                                                                       | 0.42, -0.44                                      |

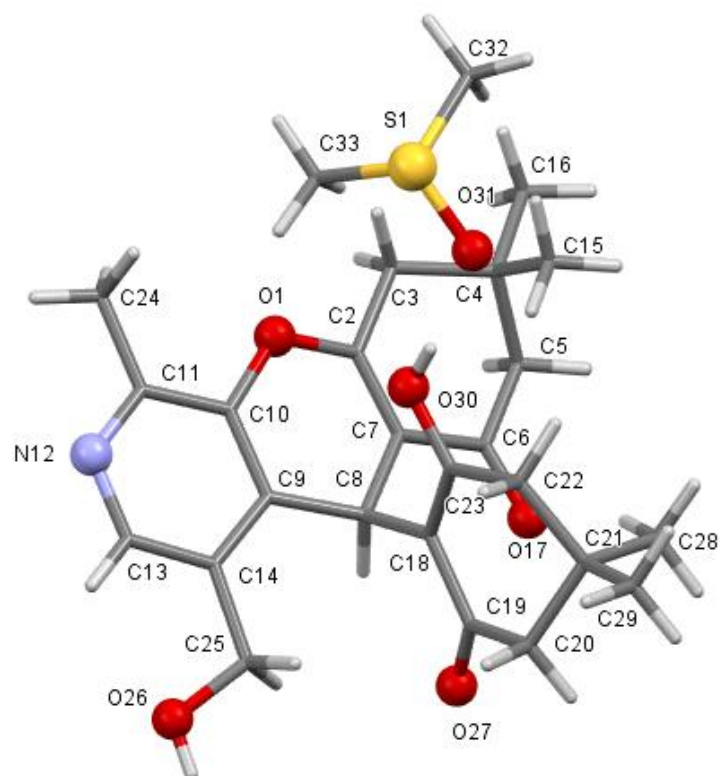

**Figure S1.** Structure of **4**-according to single crystal XRD analysis.

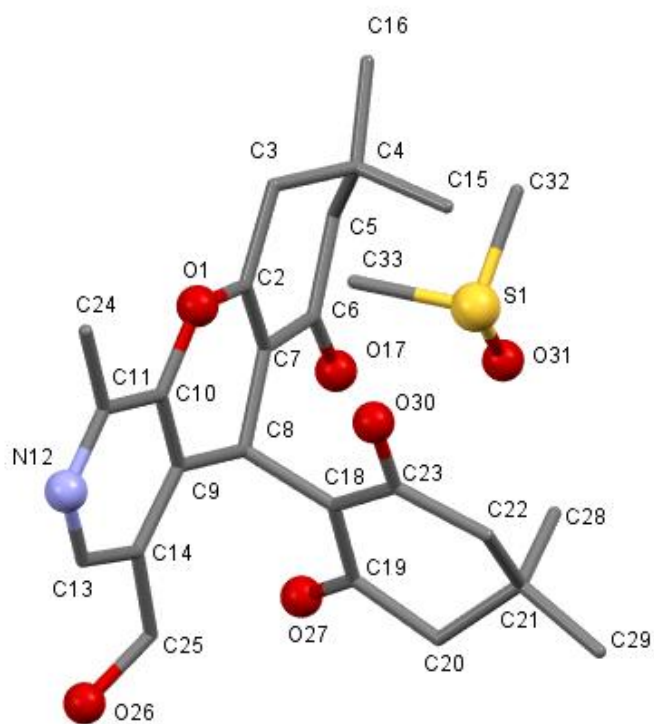

**Figure S2.** Structure of **4**-according to single crystal XRD analysis (hydrogen atoms are omitted for clarity).

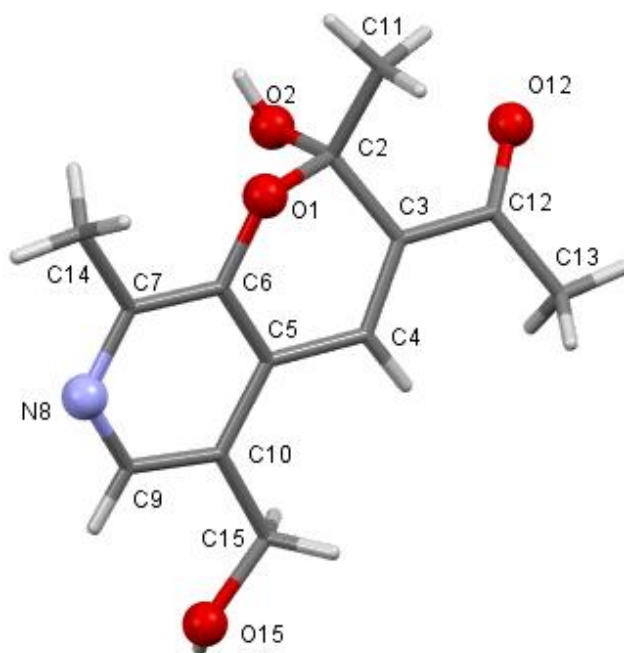

**Figure S3.** Structure of **5**-according to single crystal XRD analysis.

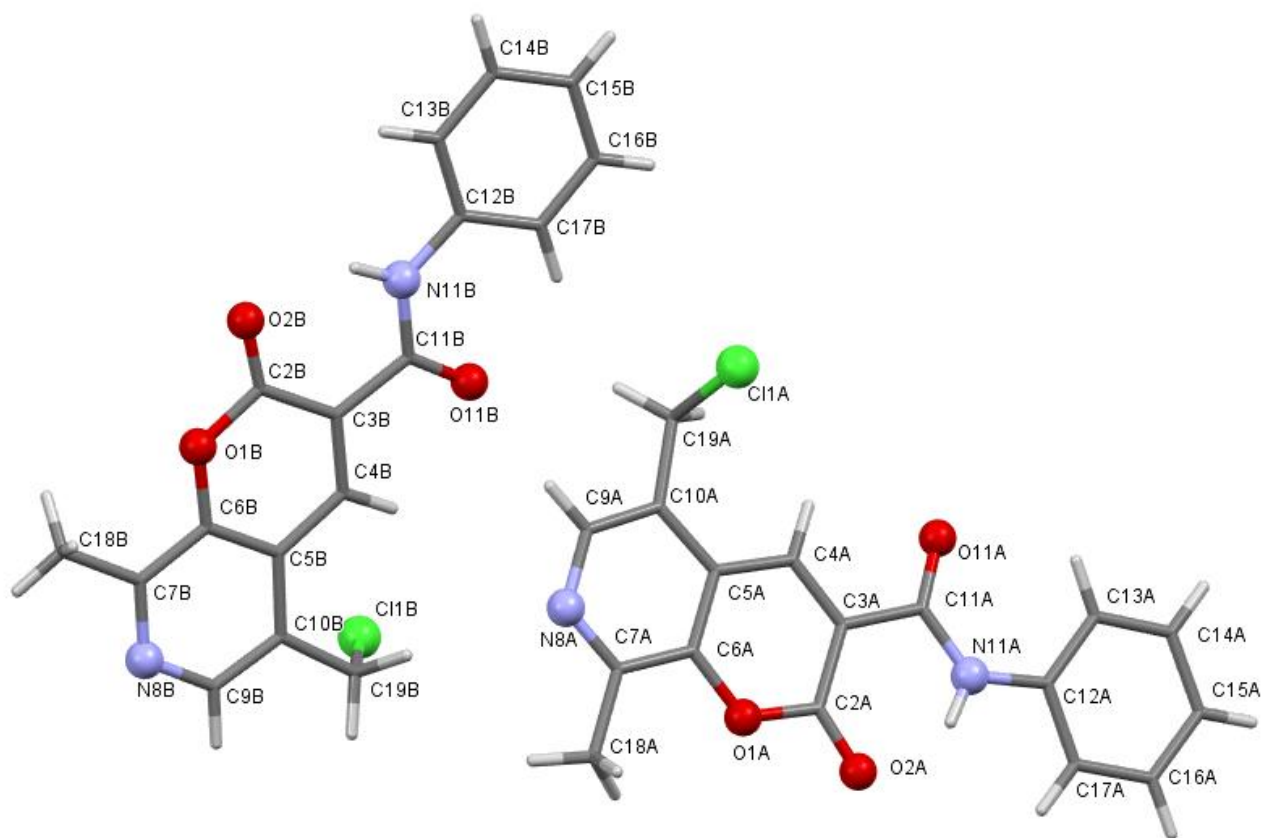

**Figure S4.** Structure of **7a**-according to single crystal XRD analysis.

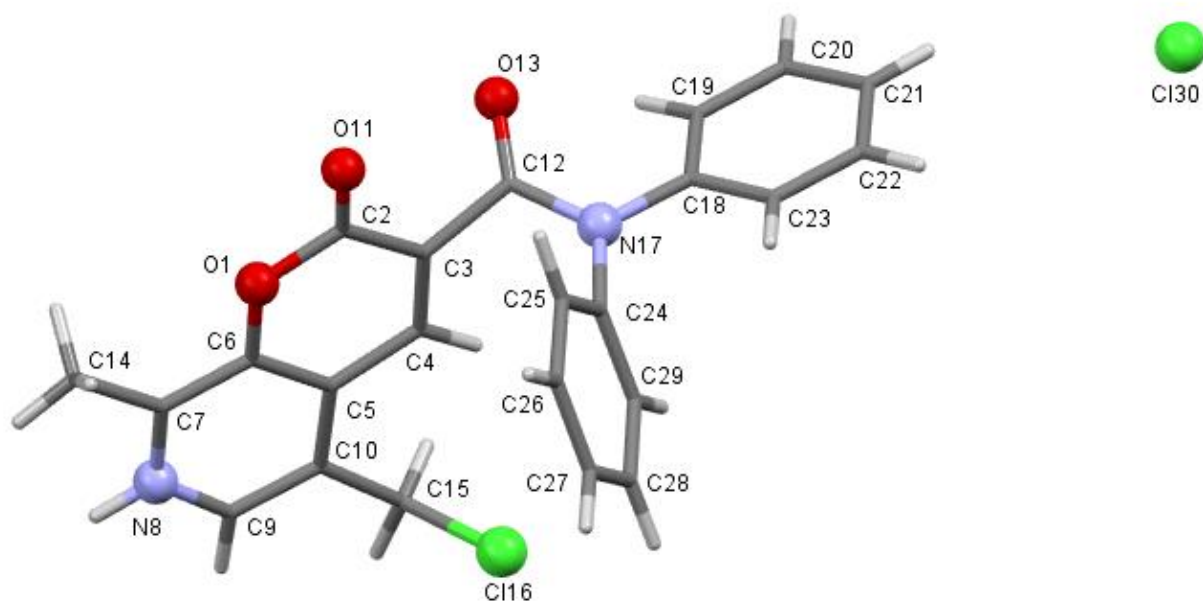

**Figure S5.** Structure of **7f** according to single crystal XRD analysis.

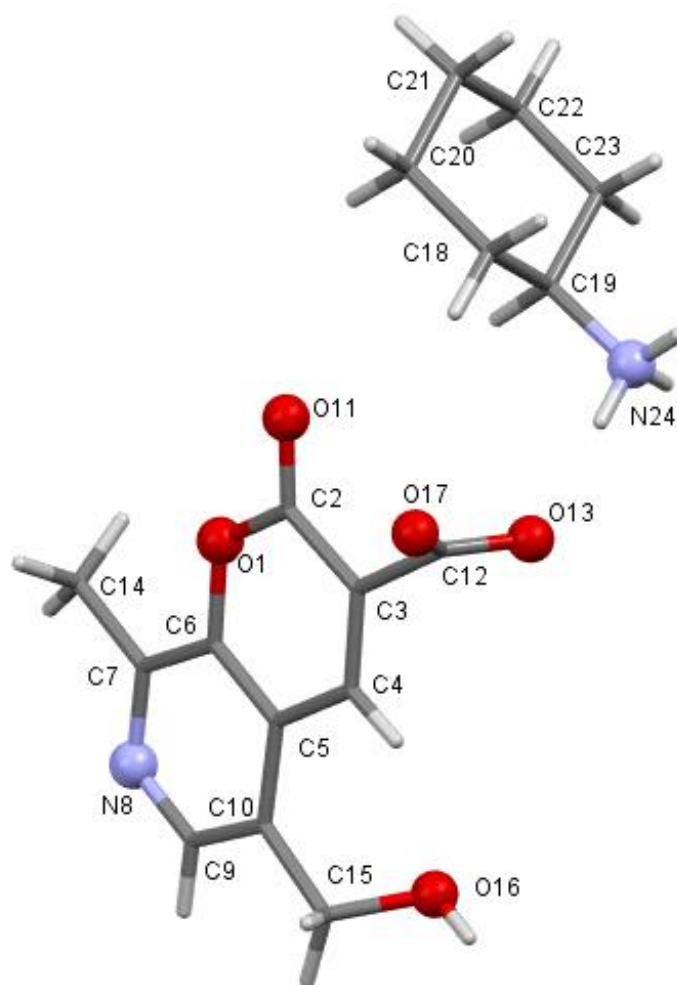

**Figure S6.** Structure of **8b** according to single crystal XRD analysis.

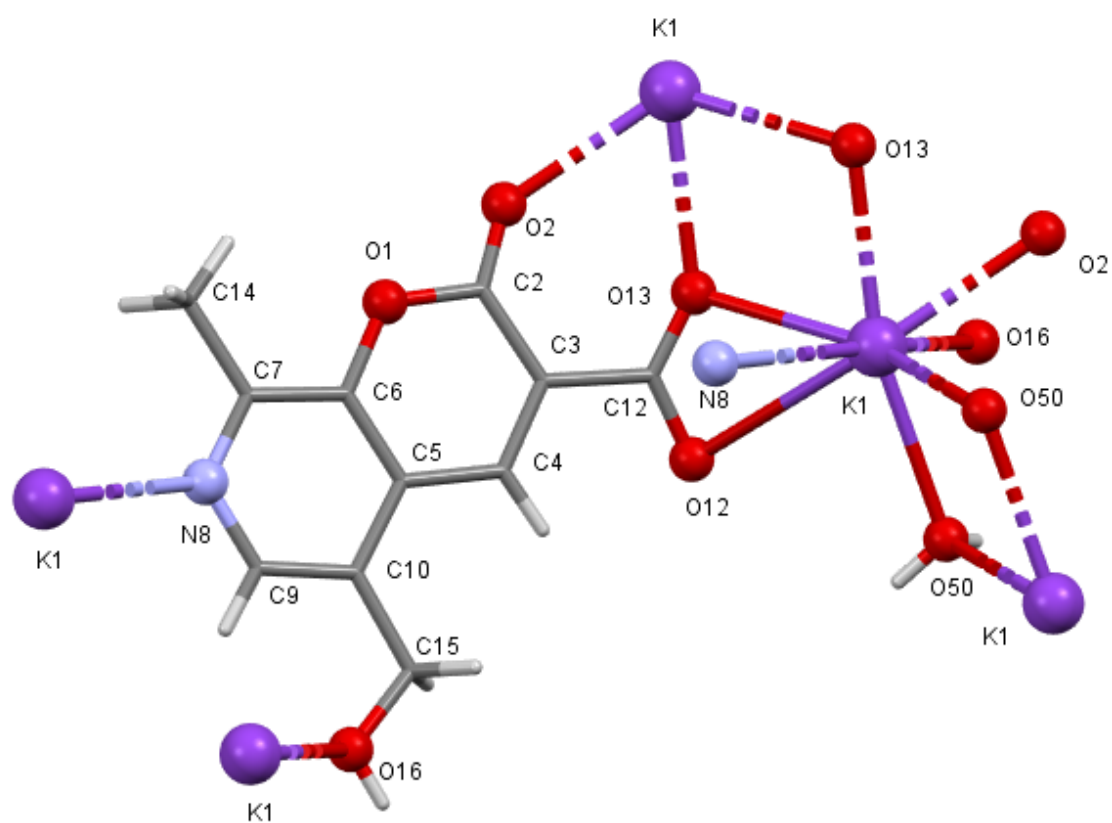

**Figure S7.** Structure of **A** according to single crystal XRD analysis.



### §3. $^1\text{H}$ and $^{13}\text{C}$ NMR spectra of the compounds

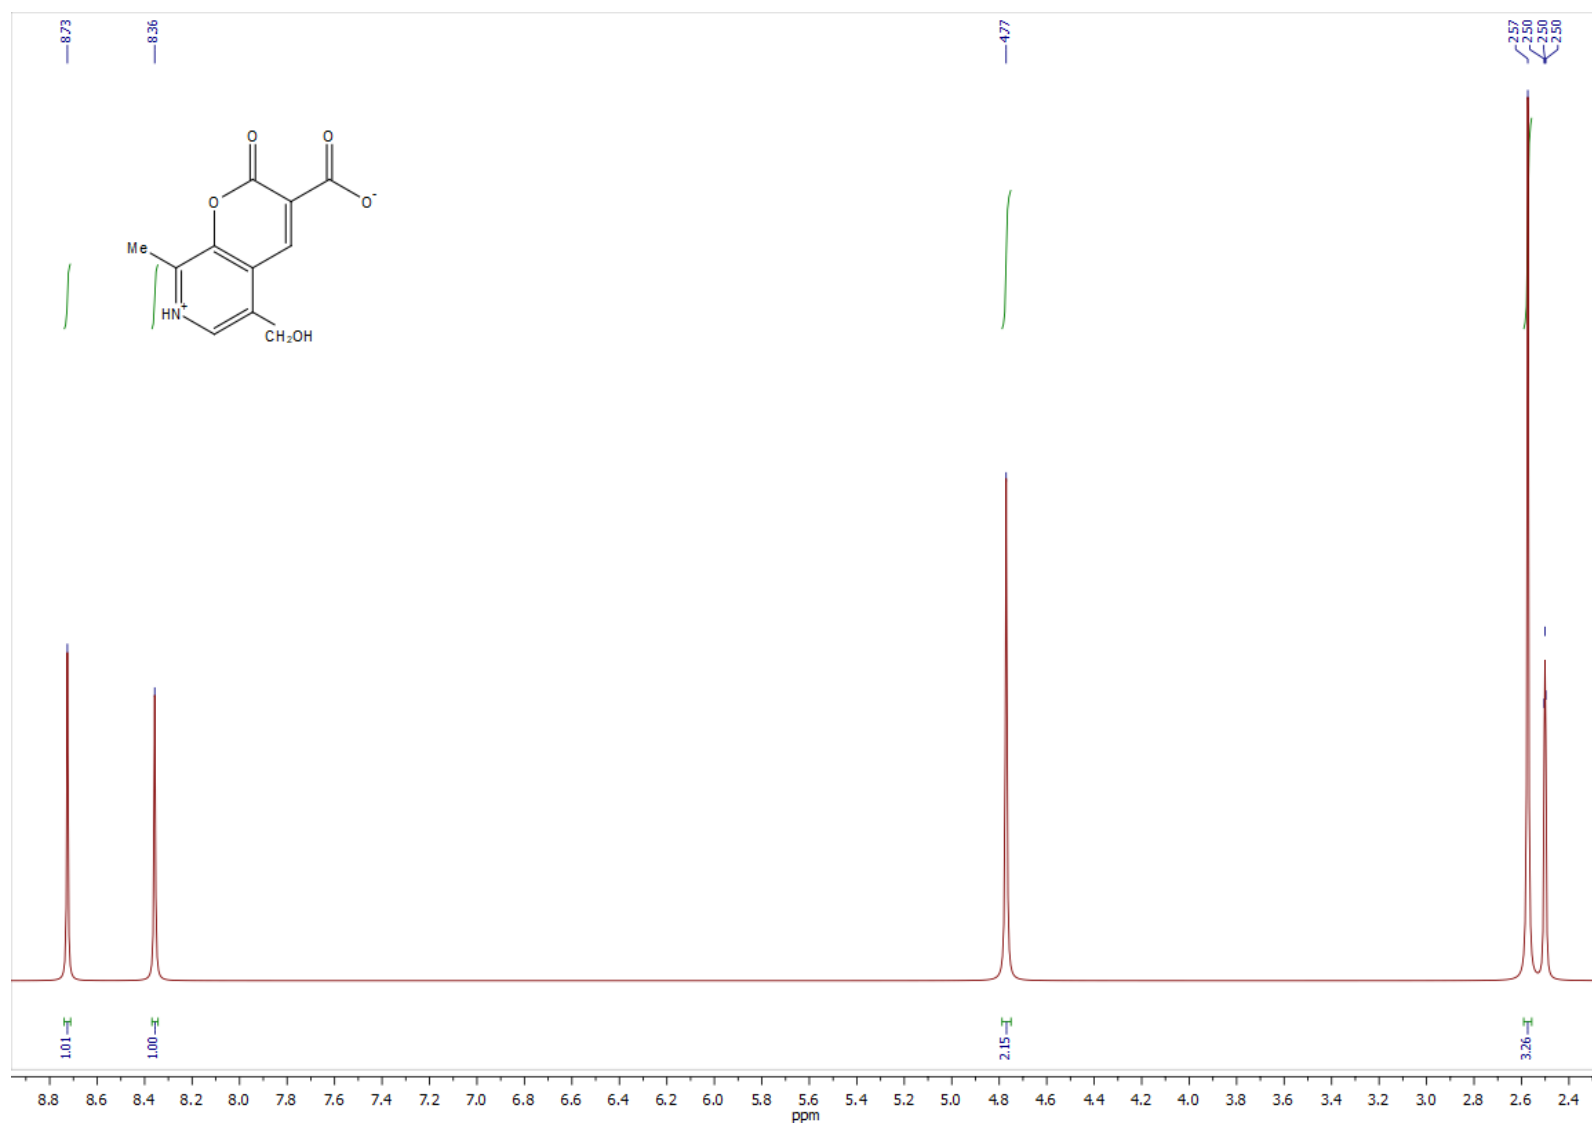

Figure S8.  $^1\text{H}$  NMR spectra of the compound **3a** (600 MHz,  $\text{DMSO}-d_6$ )

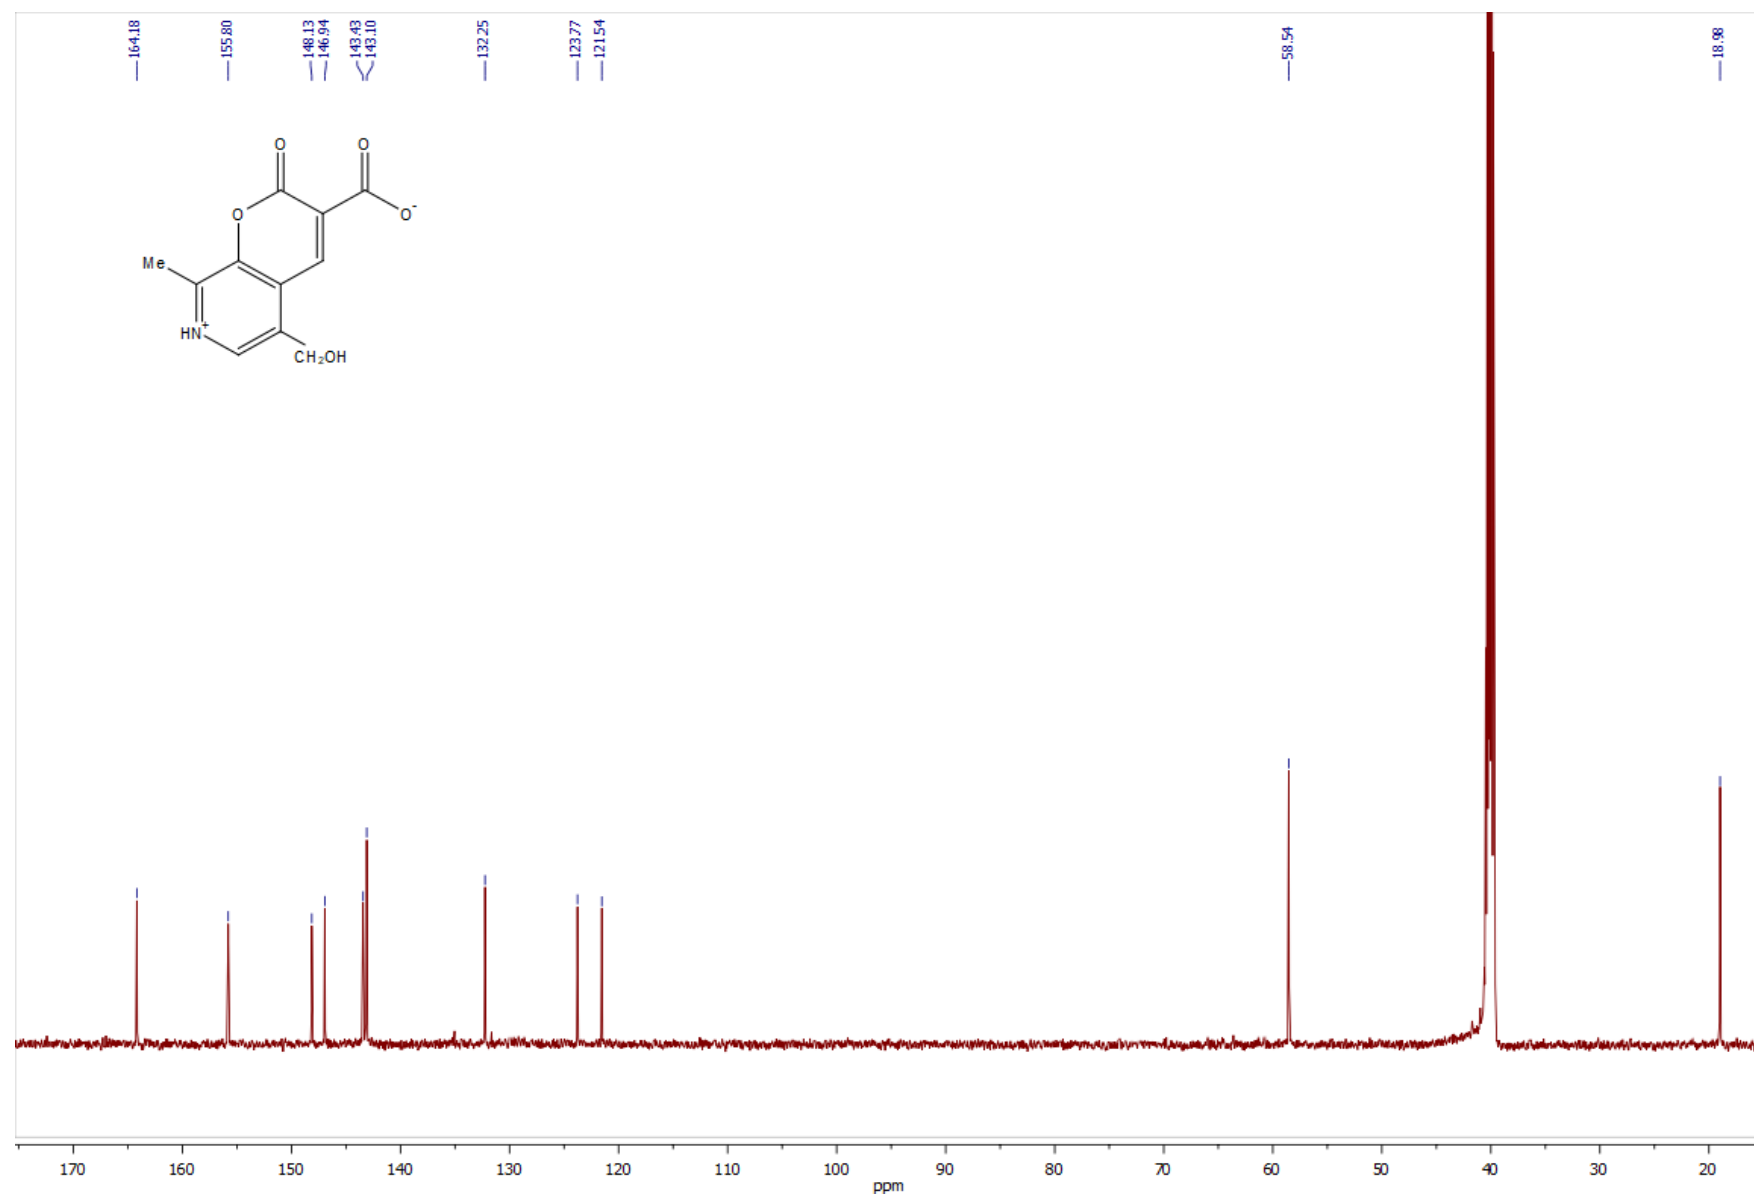

Figure S9.  $^{13}\text{C}$  NMR spectra of the compound **3a** (600 MHz,  $\text{DMSO-}d_6$ )

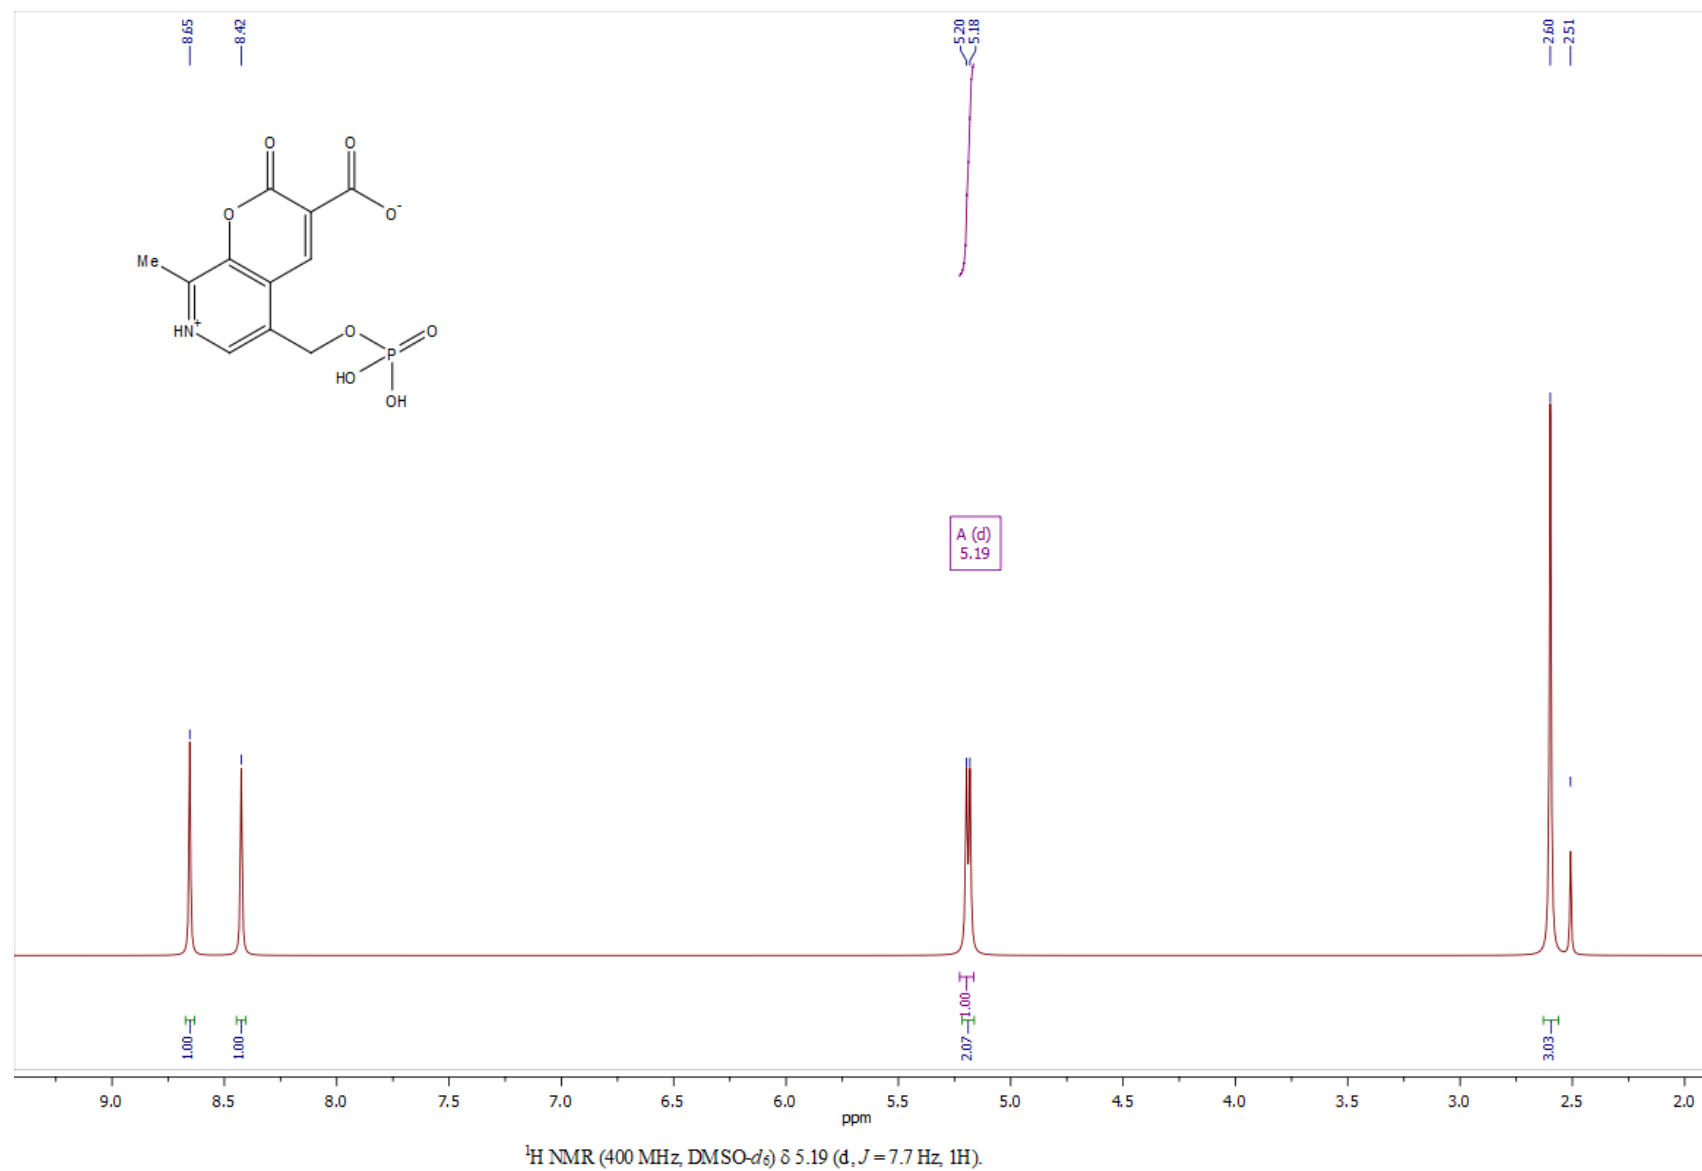

Figure S10. <sup>1</sup>H NMR spectra of the compound **3b** (400 MHz, DMSO-*d*<sub>6</sub>)

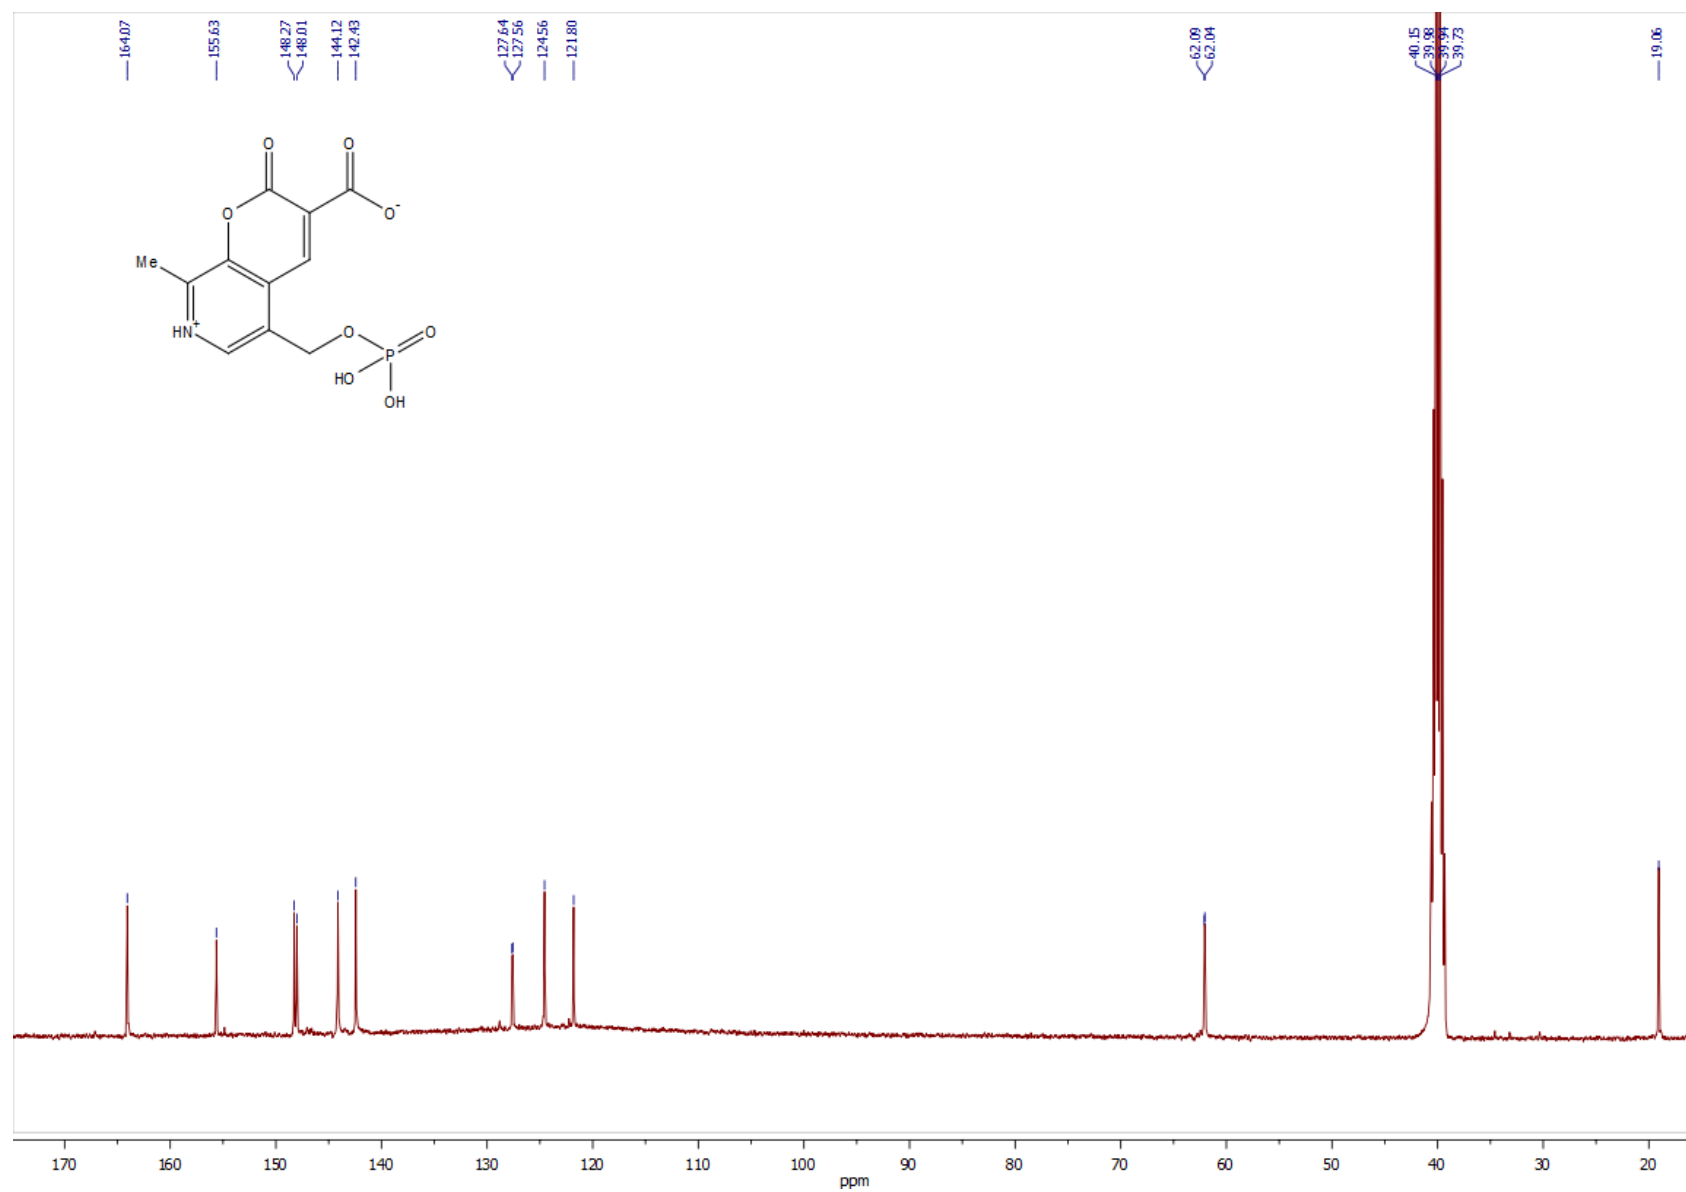

Figure S11.  $^{13}\text{C}$  NMR spectra of the compound **3b** (400 MHz,  $\text{DMSO}-d_6$ )

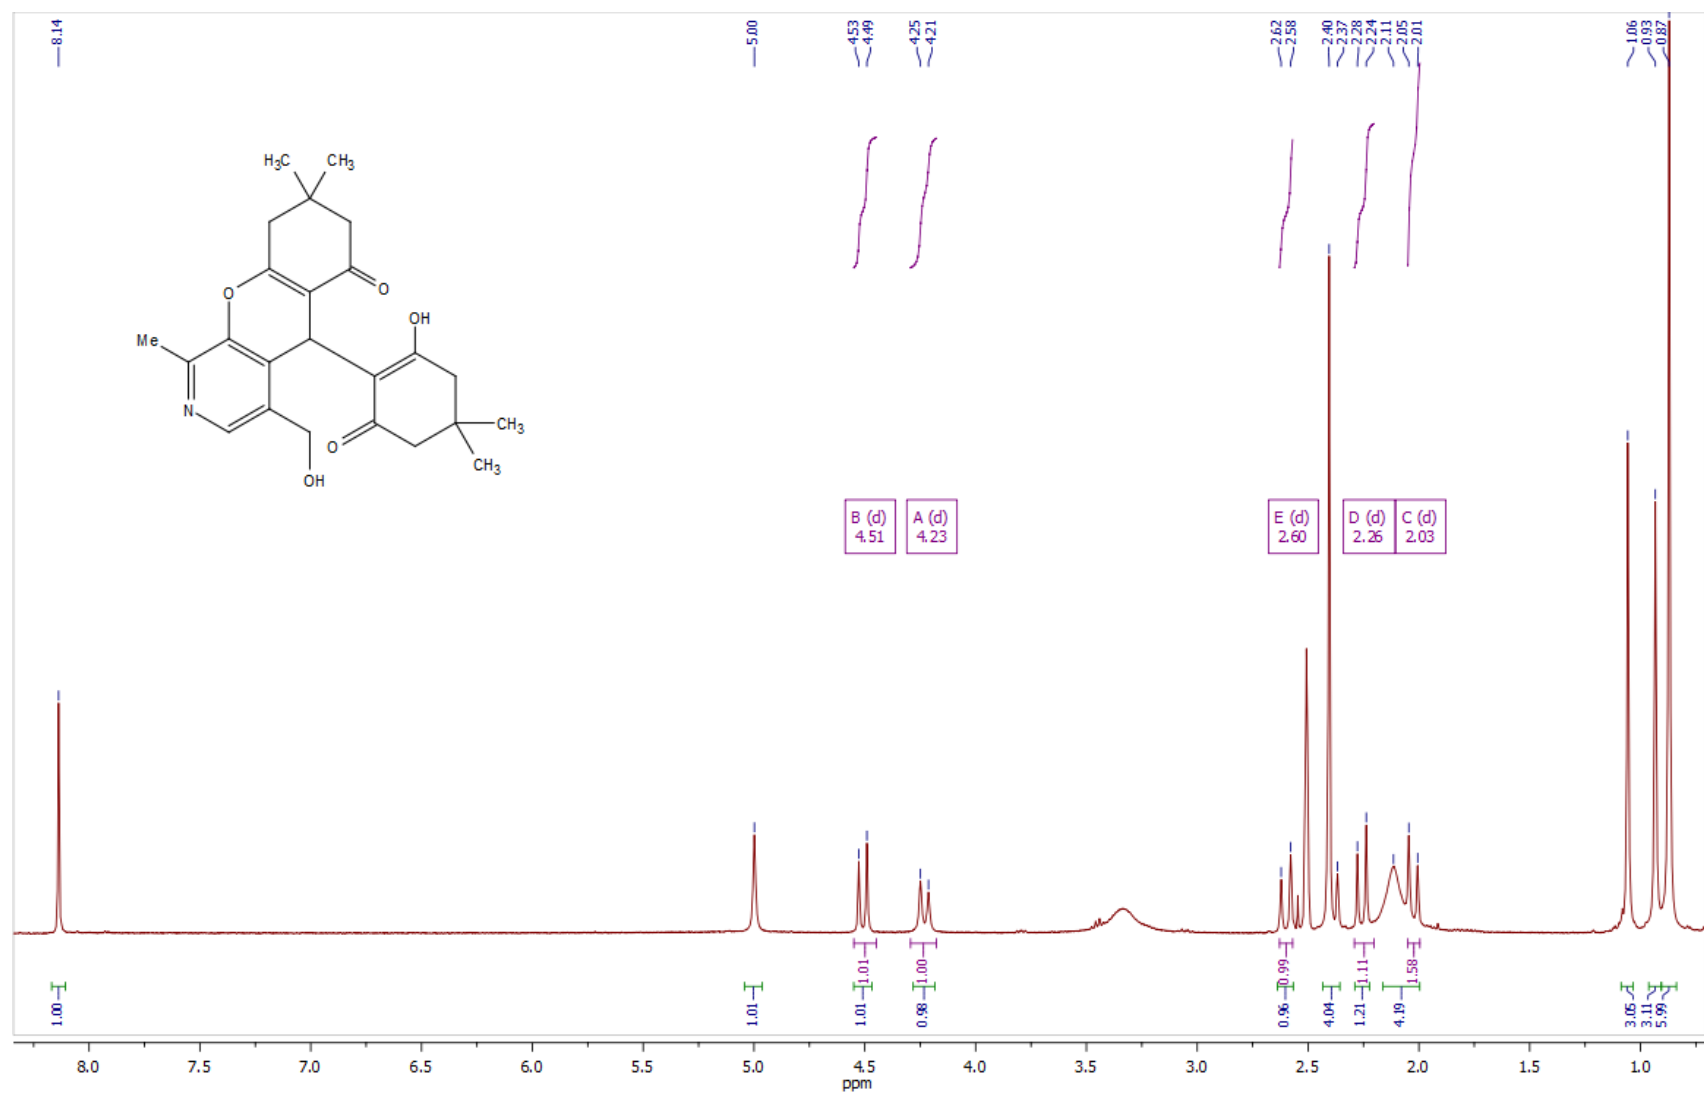

$^1\text{H}$  NMR (400 MHz,  $\text{DMSO}-d_6$ )  $\delta$  4.51 (d,  $J = 14.5$  Hz, 1H), 4.23 (d,  $J = 14.5$  Hz, 1H), 2.60 (d,  $J = 17.3$  Hz, 1H), 2.26 (d,  $J = 15.9$  Hz, 1H), 2.03 (d,  $J = 16.0$  Hz, 2H).

Figure S12.  $^1\text{H}$  NMR spectra of the compound **4** (400 MHz,  $\text{DMSO}-d_6$ )

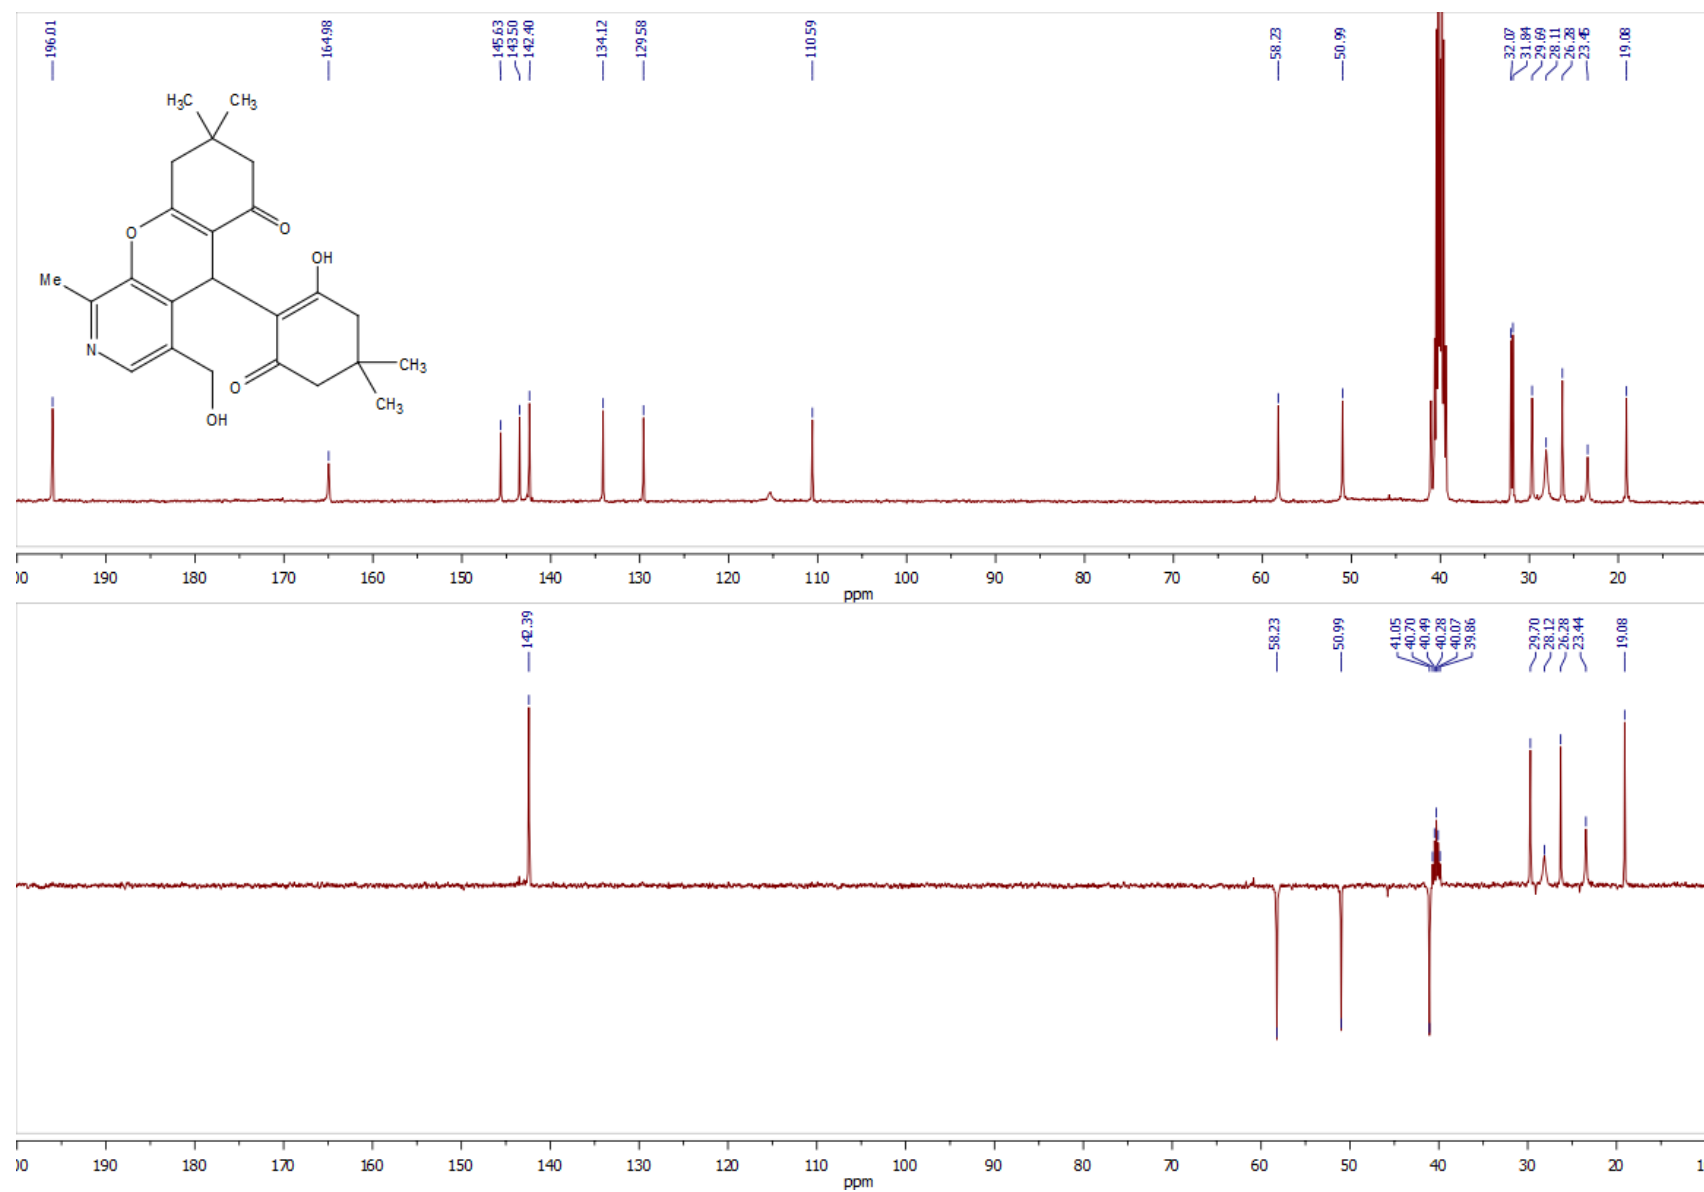

Figure S13.  $^{13}\text{C}$  NMR spectra of the compound **4** (400 MHz,  $\text{DMSO}-d_6$ )

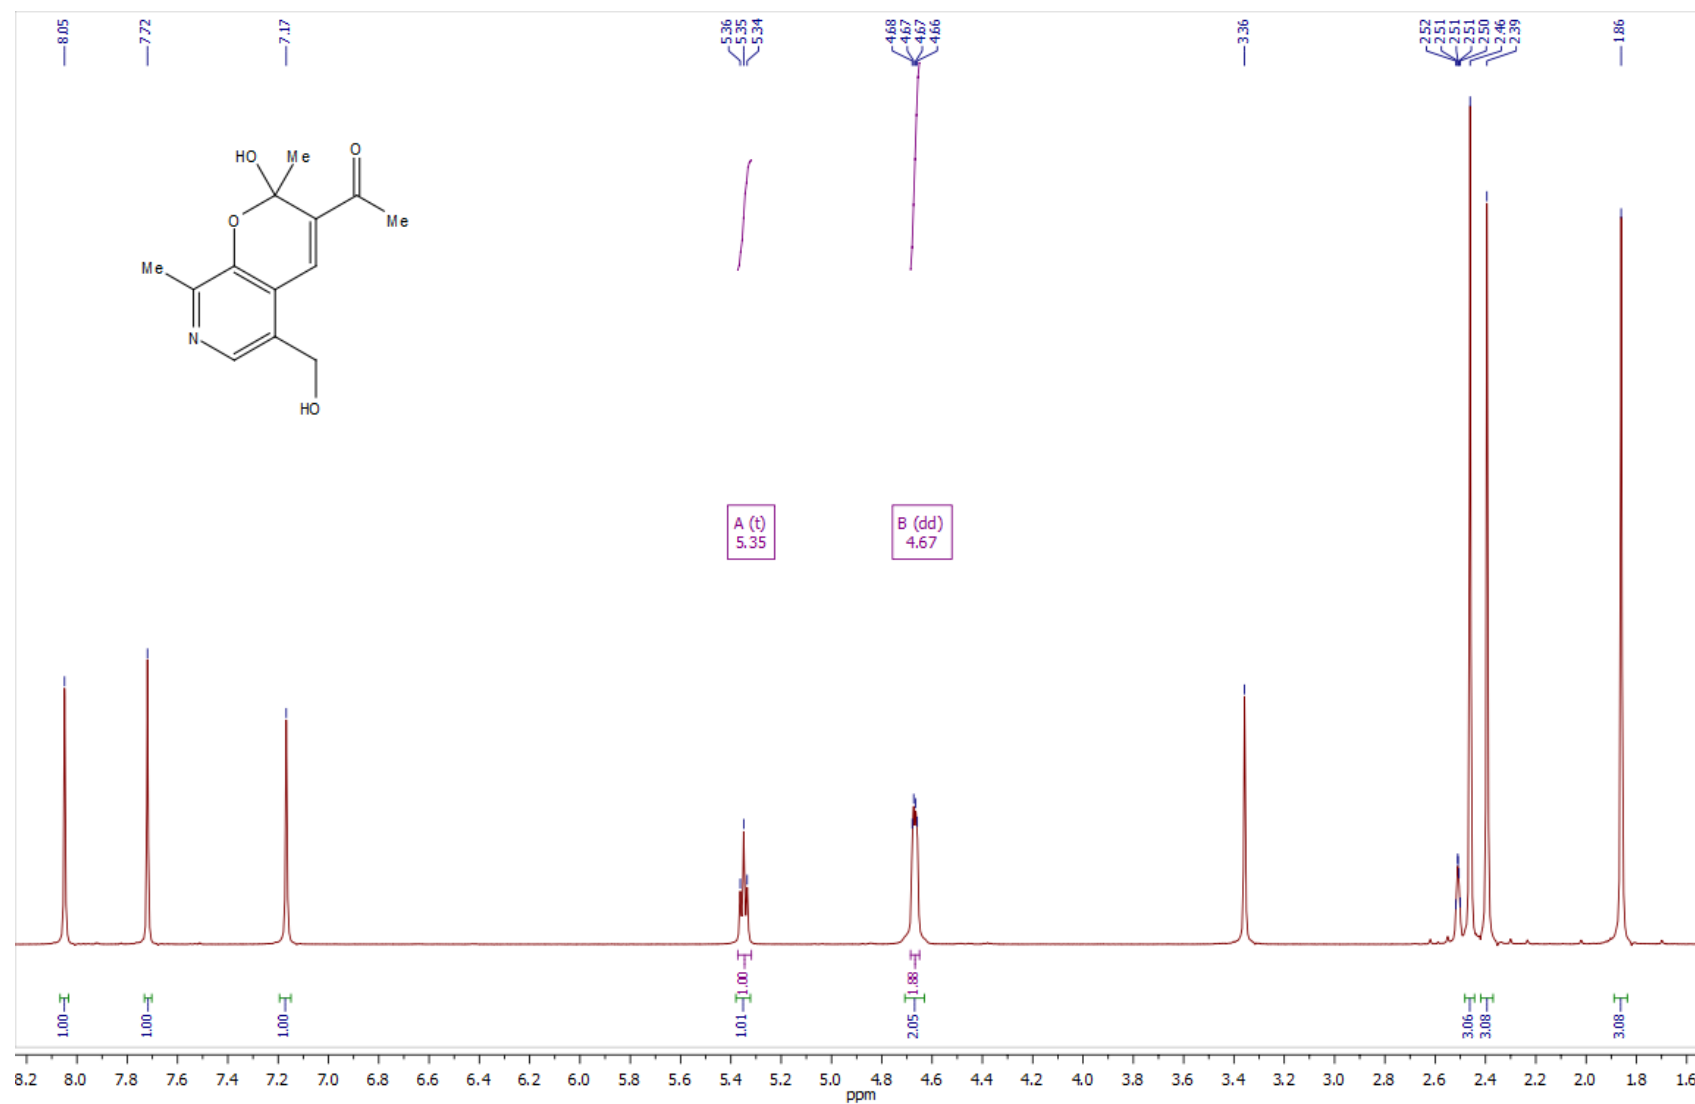

$^1\text{H}$  NMR (400 MHz,  $\text{DMSO}-d_6$ )  $\delta$  5.35 (t,  $J = 5.5$  Hz, 1H), 4.67 (dd,  $J = 5.6, 2.3$  Hz, 2H).

Figure S14.  $^1\text{H}$  NMR spectra of the compound **5** (400 MHz,  $\text{DMSO}-d_6$ )

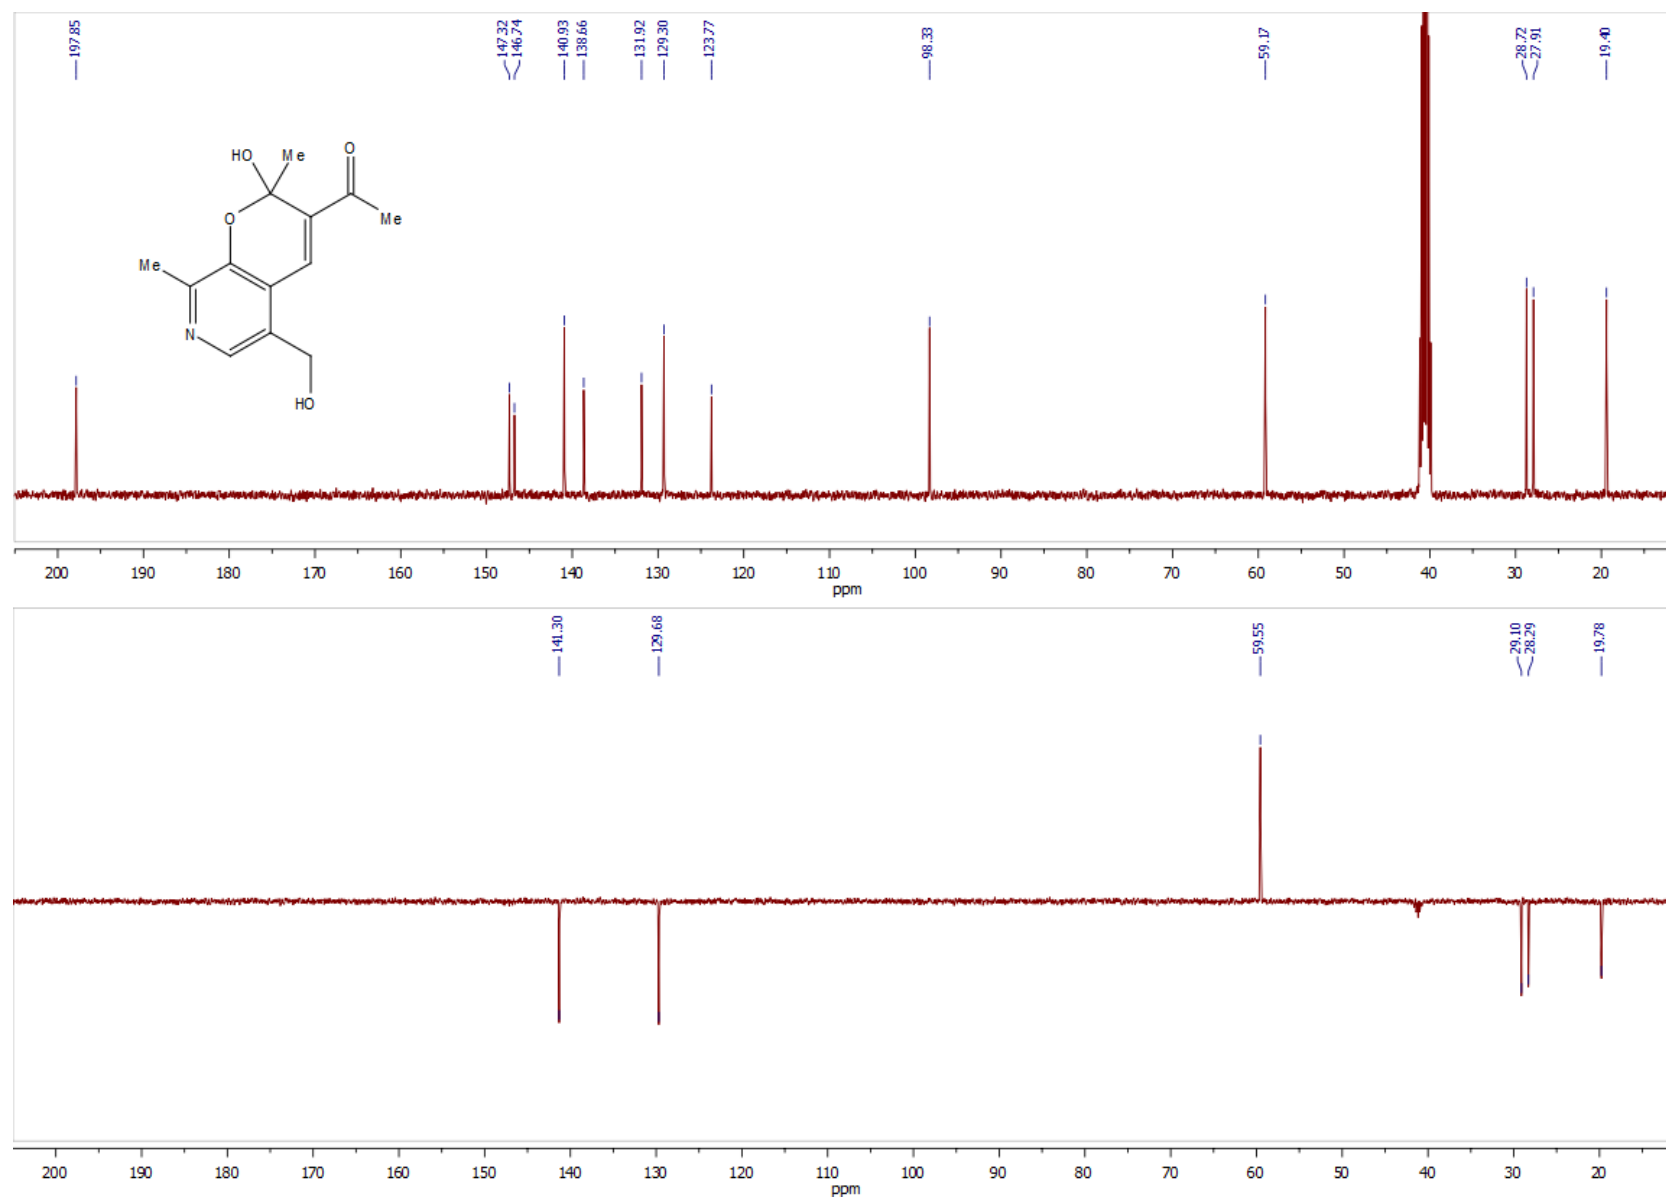

Figure S15.  $^{13}\text{C}$  NMR spectra of the compound 5 (400 MHz,  $\text{DMSO}-d_6$ )



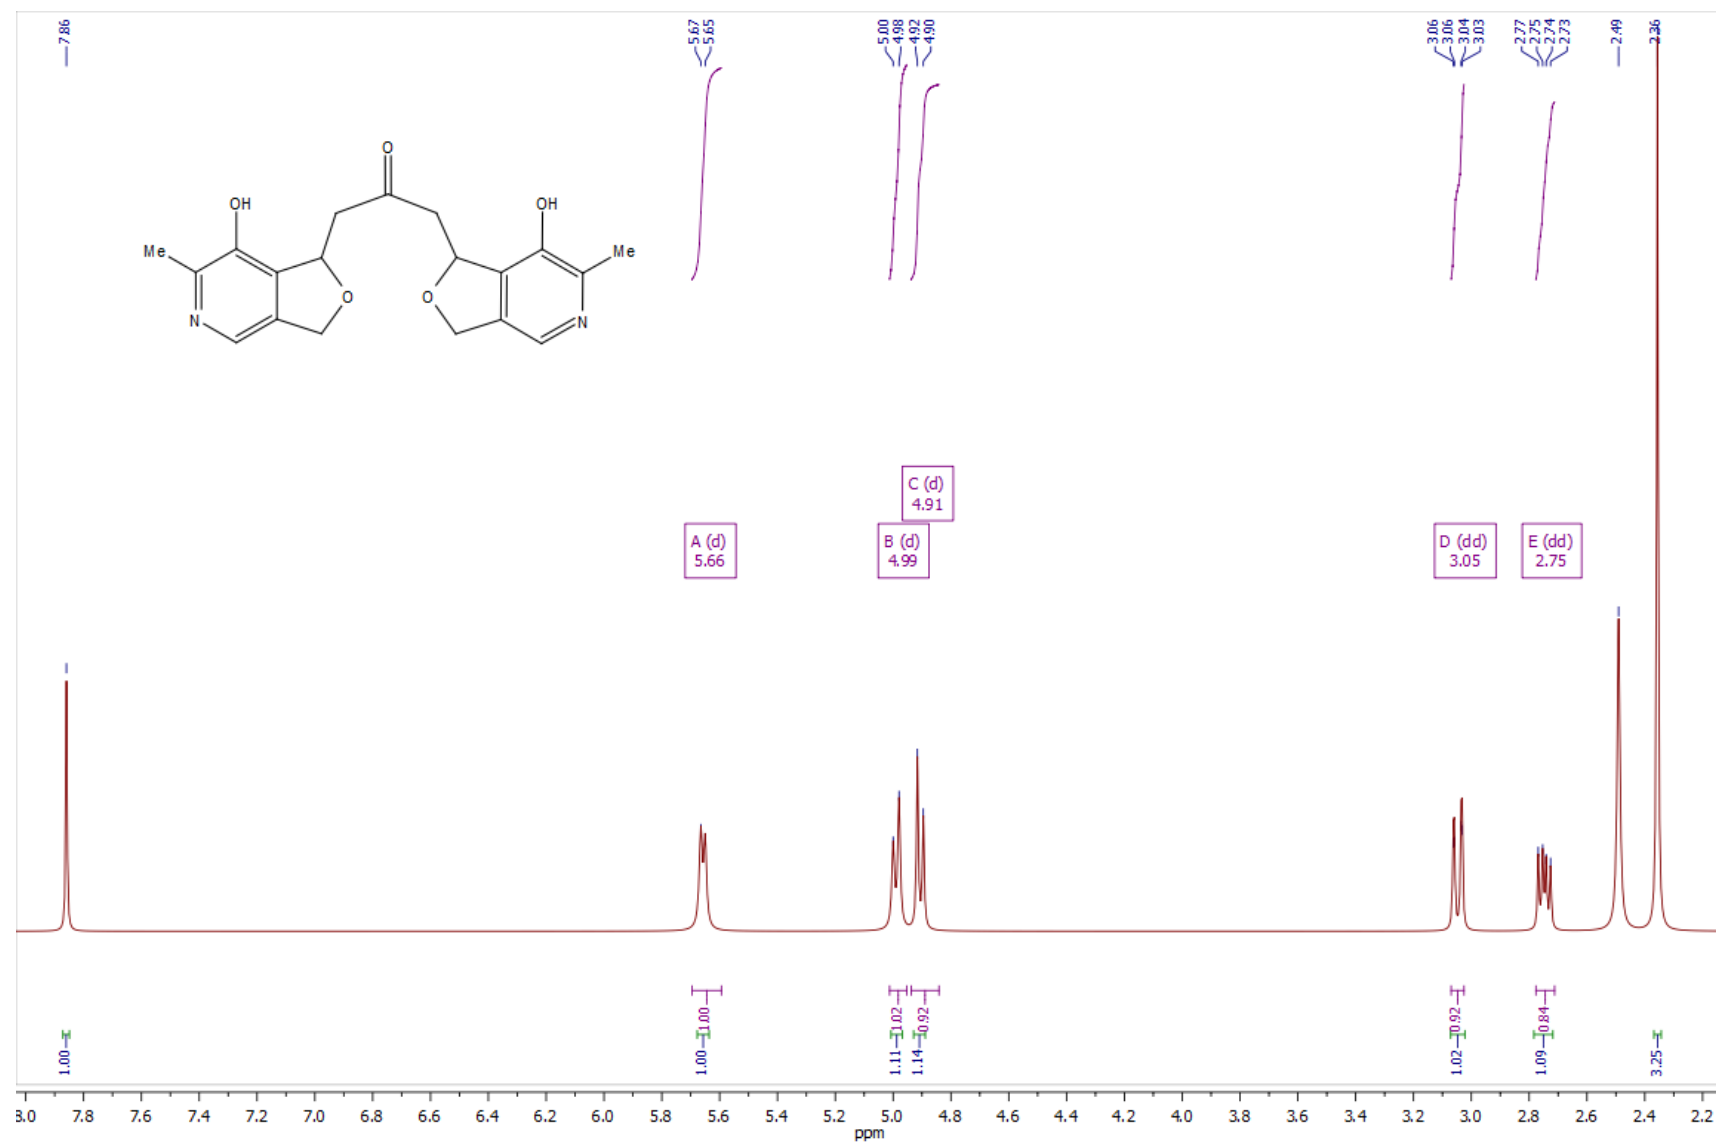

<sup>1</sup>H NMR (600 MHz, DMSO-*d*<sub>6</sub>) δ 5.66 (d, *J* = 9.1 Hz, 1H), 4.99 (d, *J* = 12.2 Hz, 1H), 4.91 (d, *J* = 12.3 Hz, 1H), 3.05 (dd, *J* = 16.3, 2.4 Hz, 1H), 2.75 (dd, *J* = 16.3, 9.2 Hz, 1H).

Figure S16. <sup>1</sup>H NMR spectra of the compound **6** (600 MHz, DMSO-*d*<sub>6</sub>)

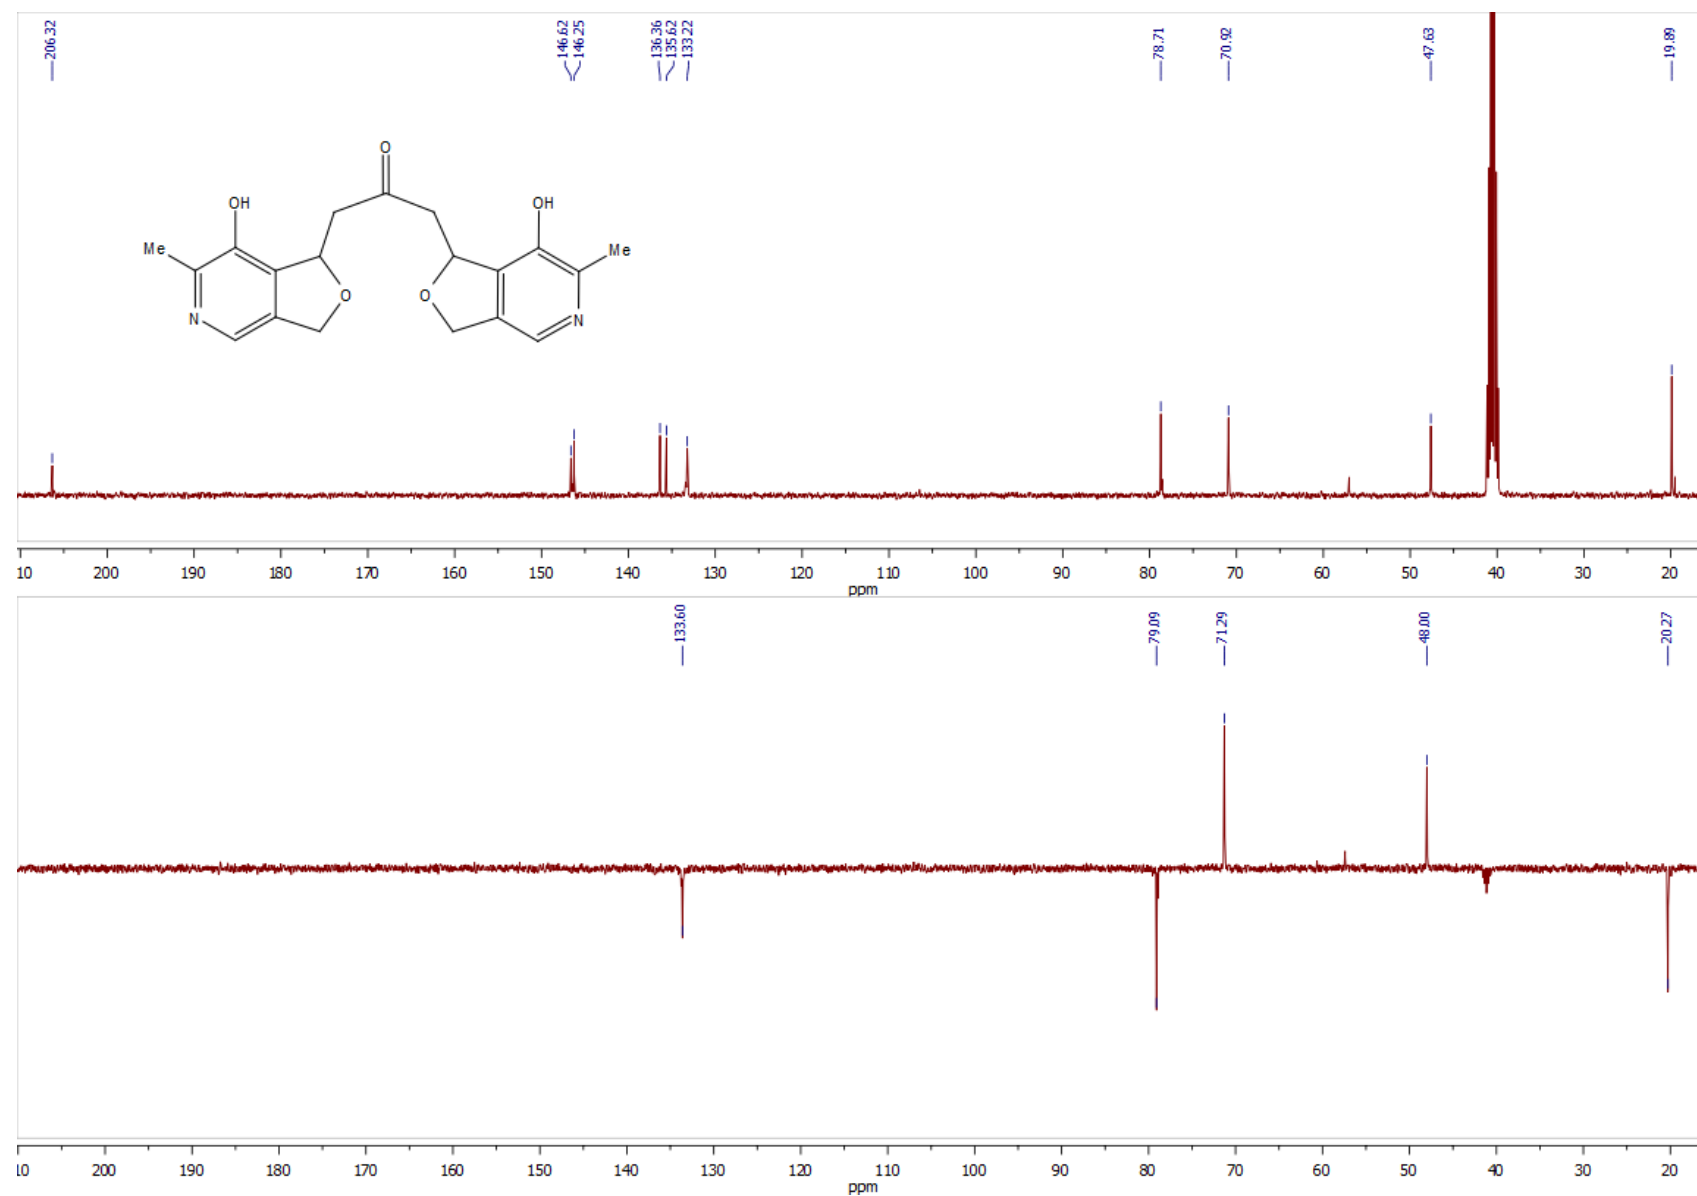

Figure S17. <sup>13</sup>C NMR spectra of the compound 6 (600 MHz, DMSO-*d*<sub>6</sub>)

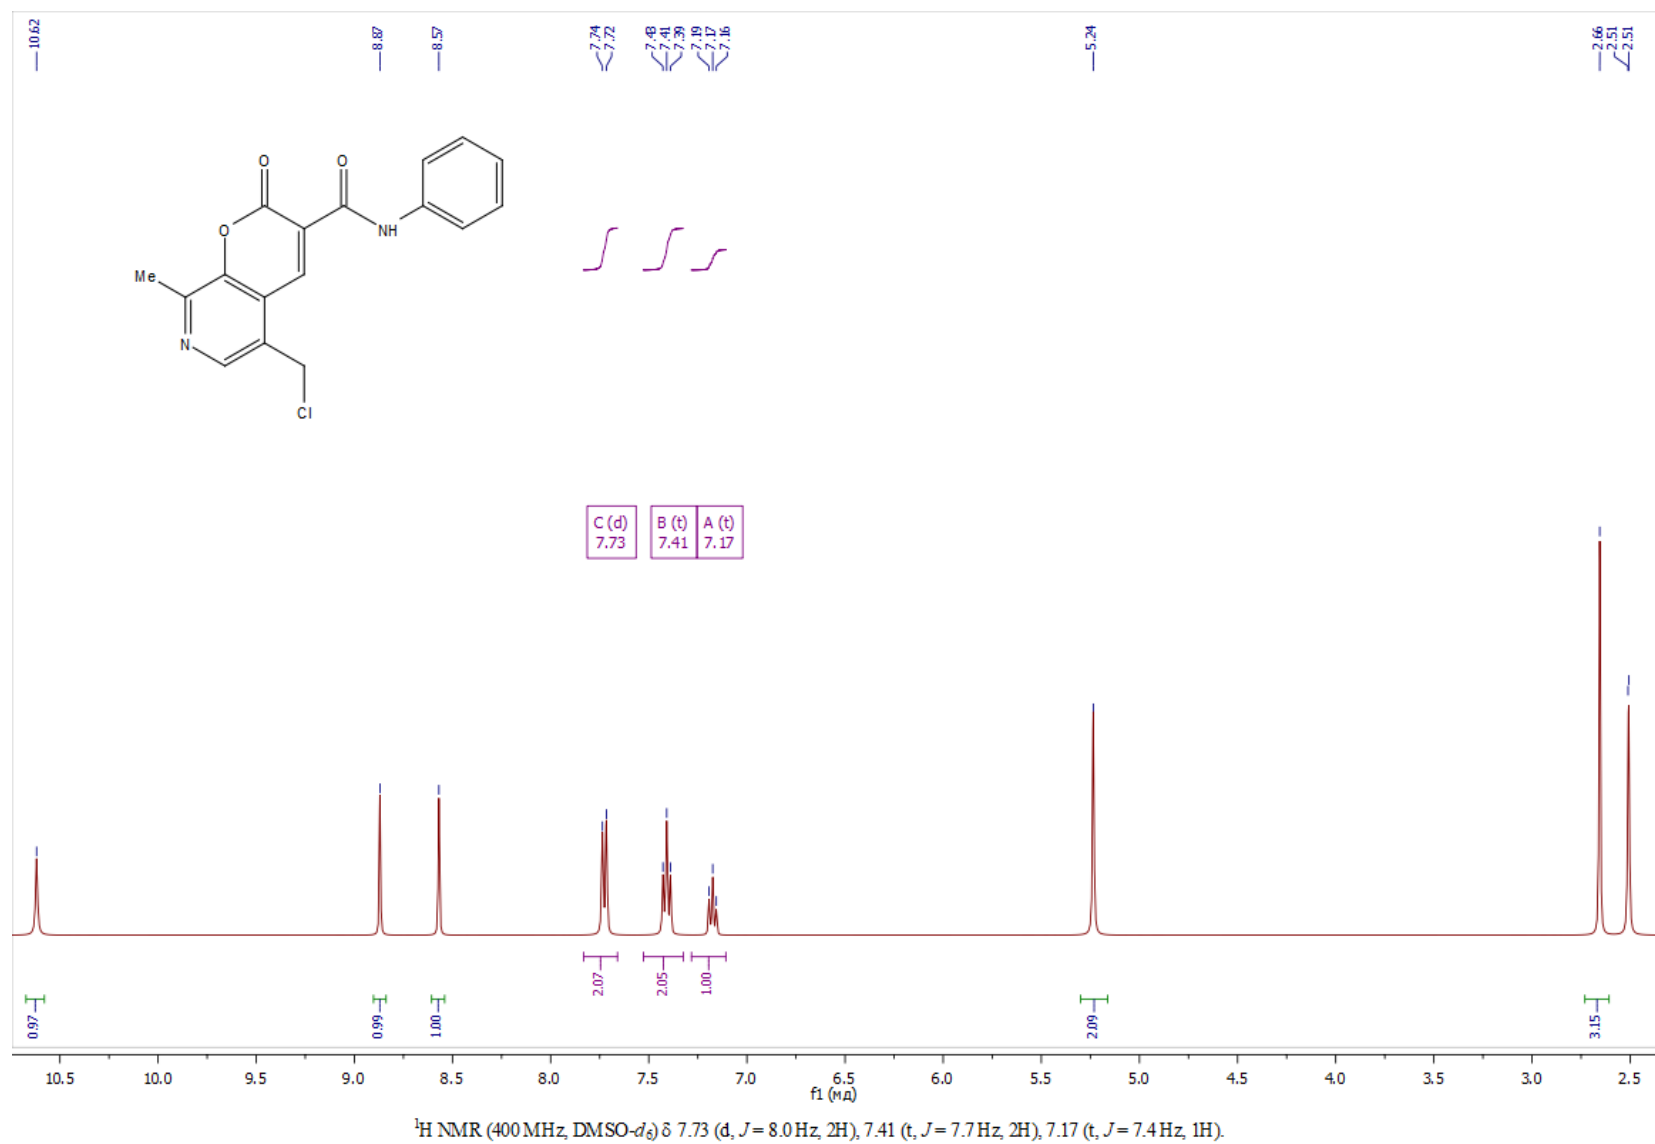

Figure S18. <sup>1</sup>H NMR spectra of the compound **7a** (400 MHz, DMSO-*d*<sub>6</sub>)

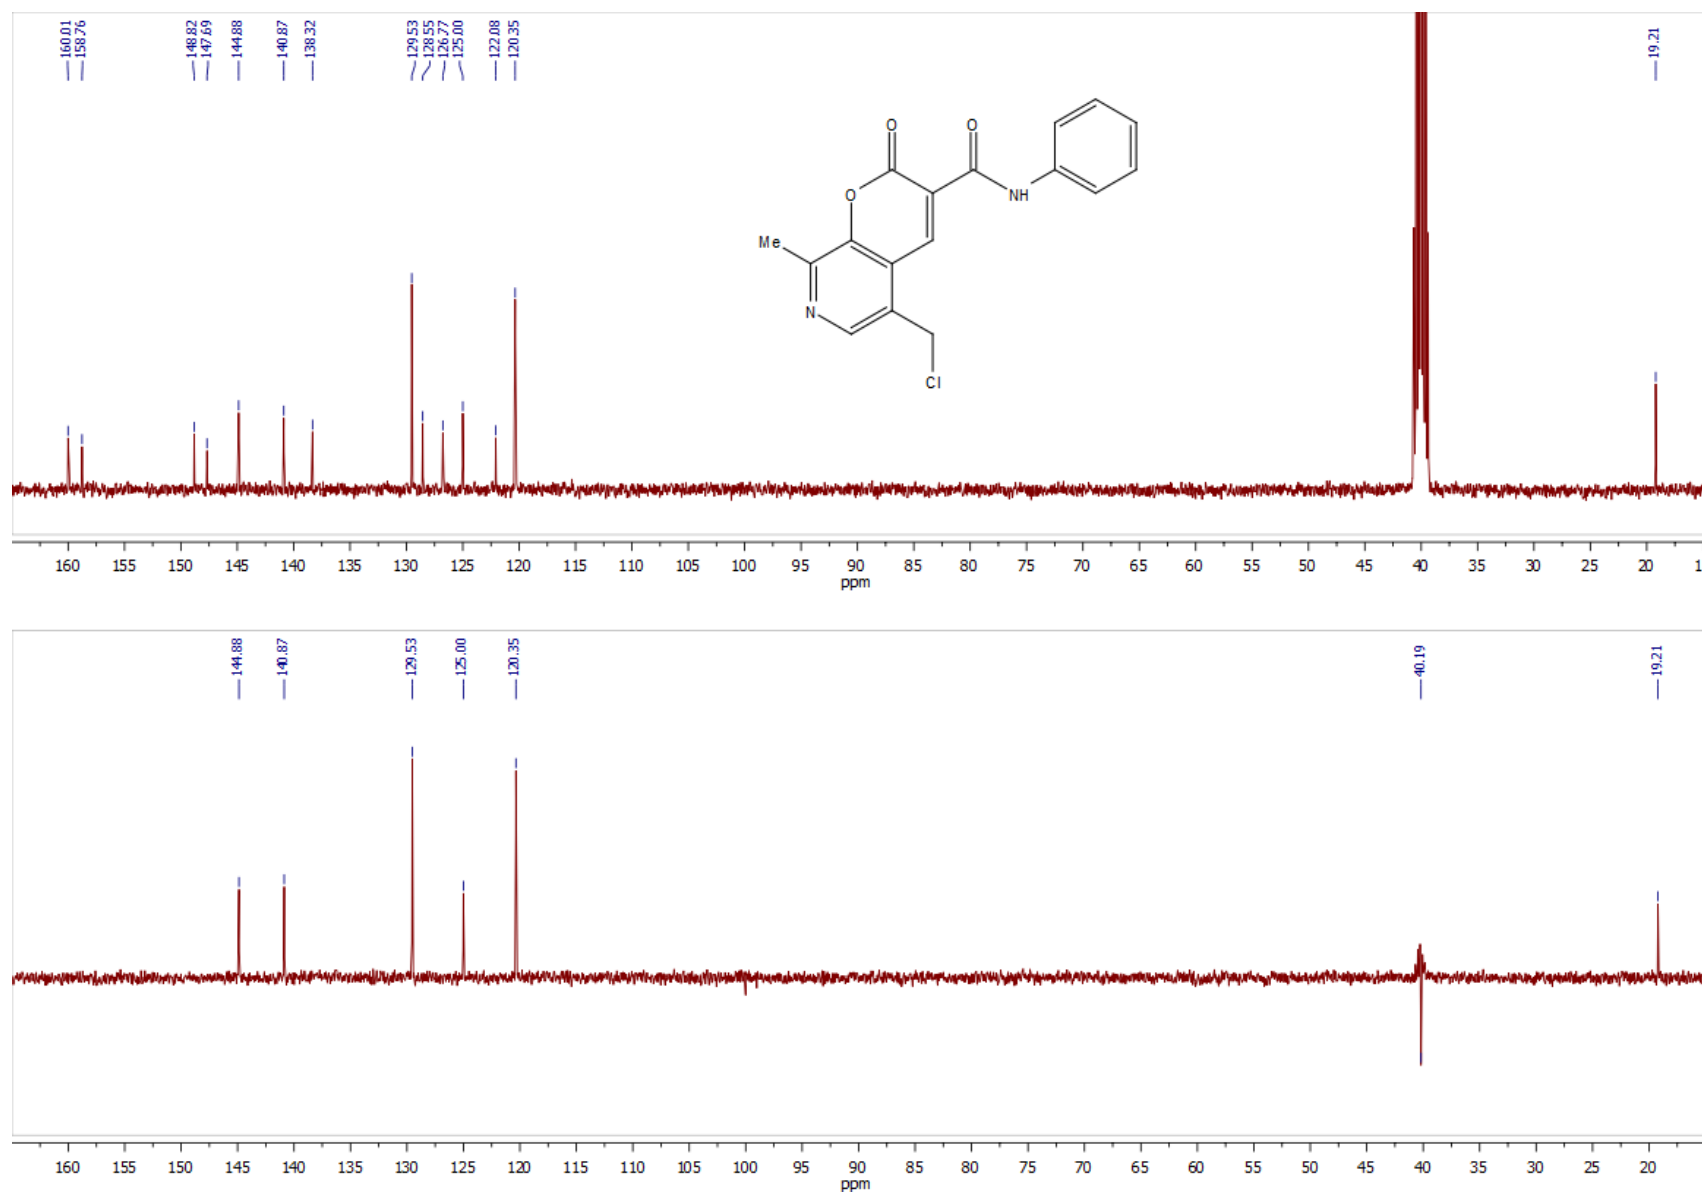

Figure S19.  $^{13}\text{C}$  NMR spectra of the compound **7a** (400 MHz,  $\text{DMSO}-d_6$ )

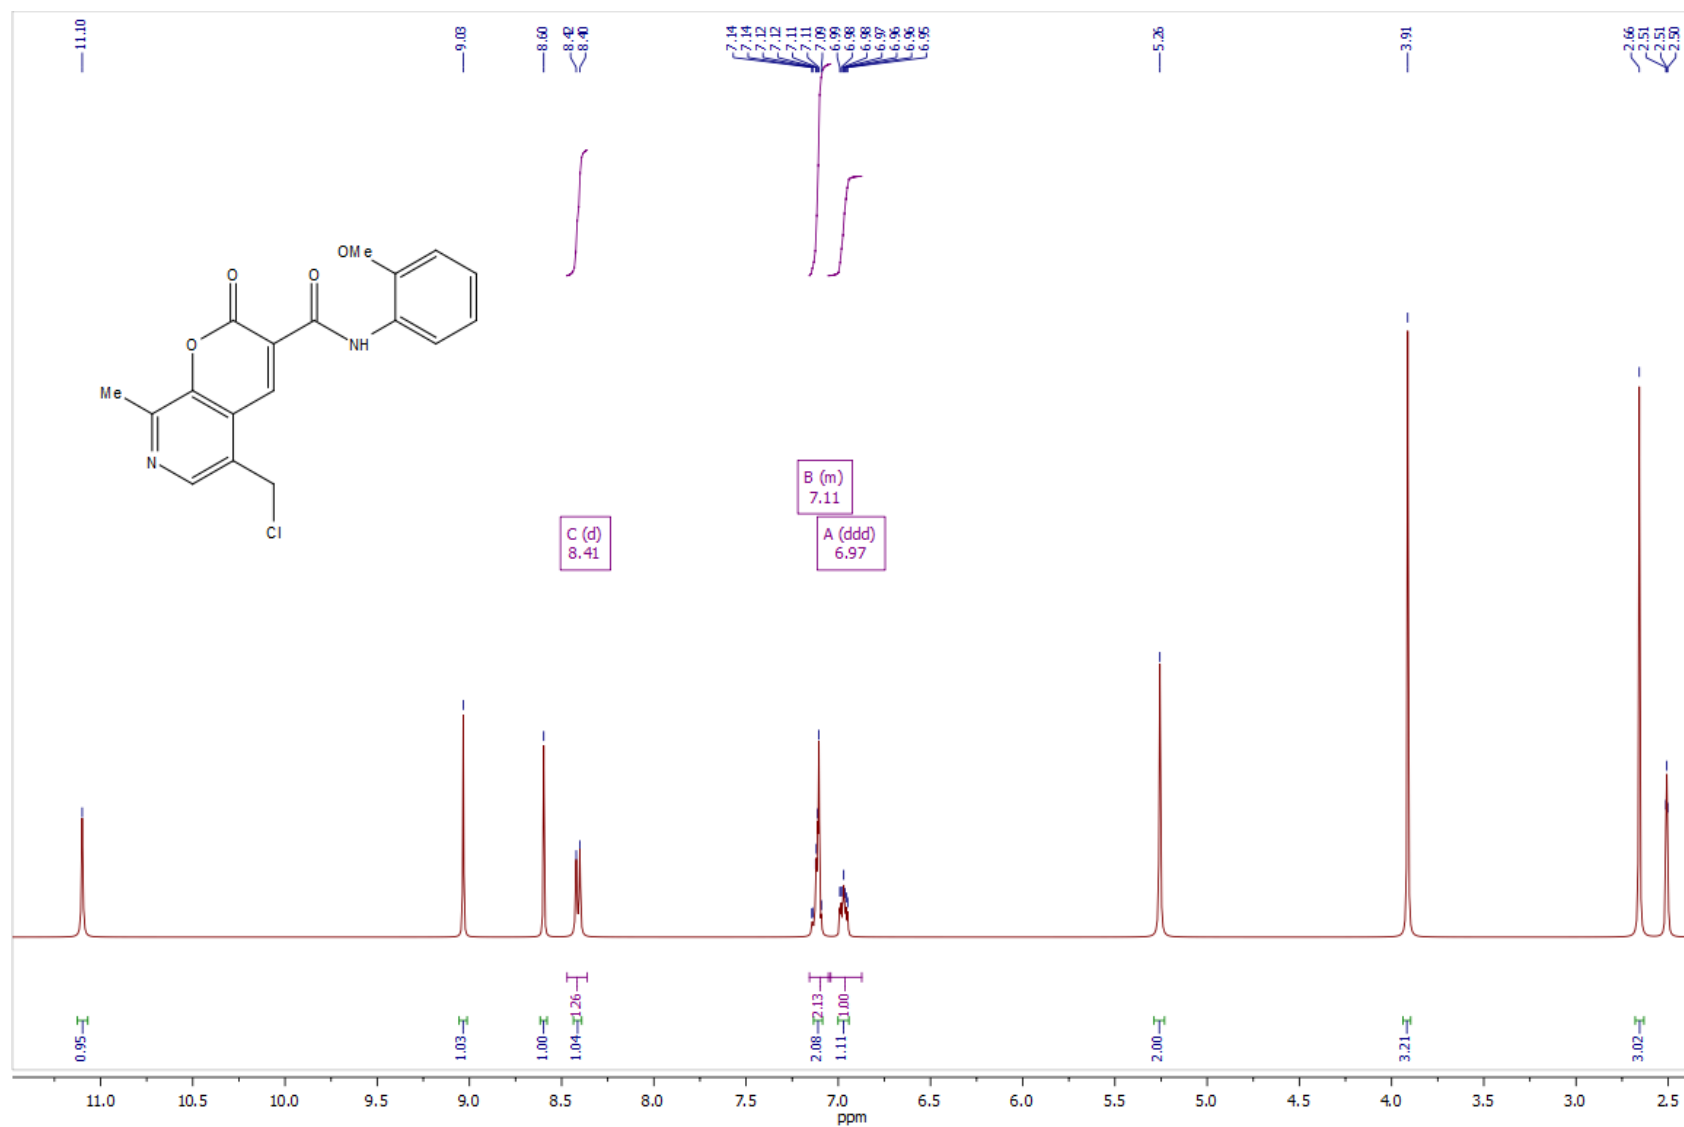

$^1\text{H}$  NMR (400 MHz,  $\text{DMSO}-d_6$ )  $\delta$  8.41 (d,  $J = 7.8$  Hz, 1H), 7.16 – 7.04 (m, 2H), 6.97 (ddd,  $J = 8.5, 5.9, 2.9$  Hz, 1H).

Figure S20.  $^1\text{H}$  NMR spectra of the compound **7b** (400 MHz,  $\text{DMSO}-d_6$ )

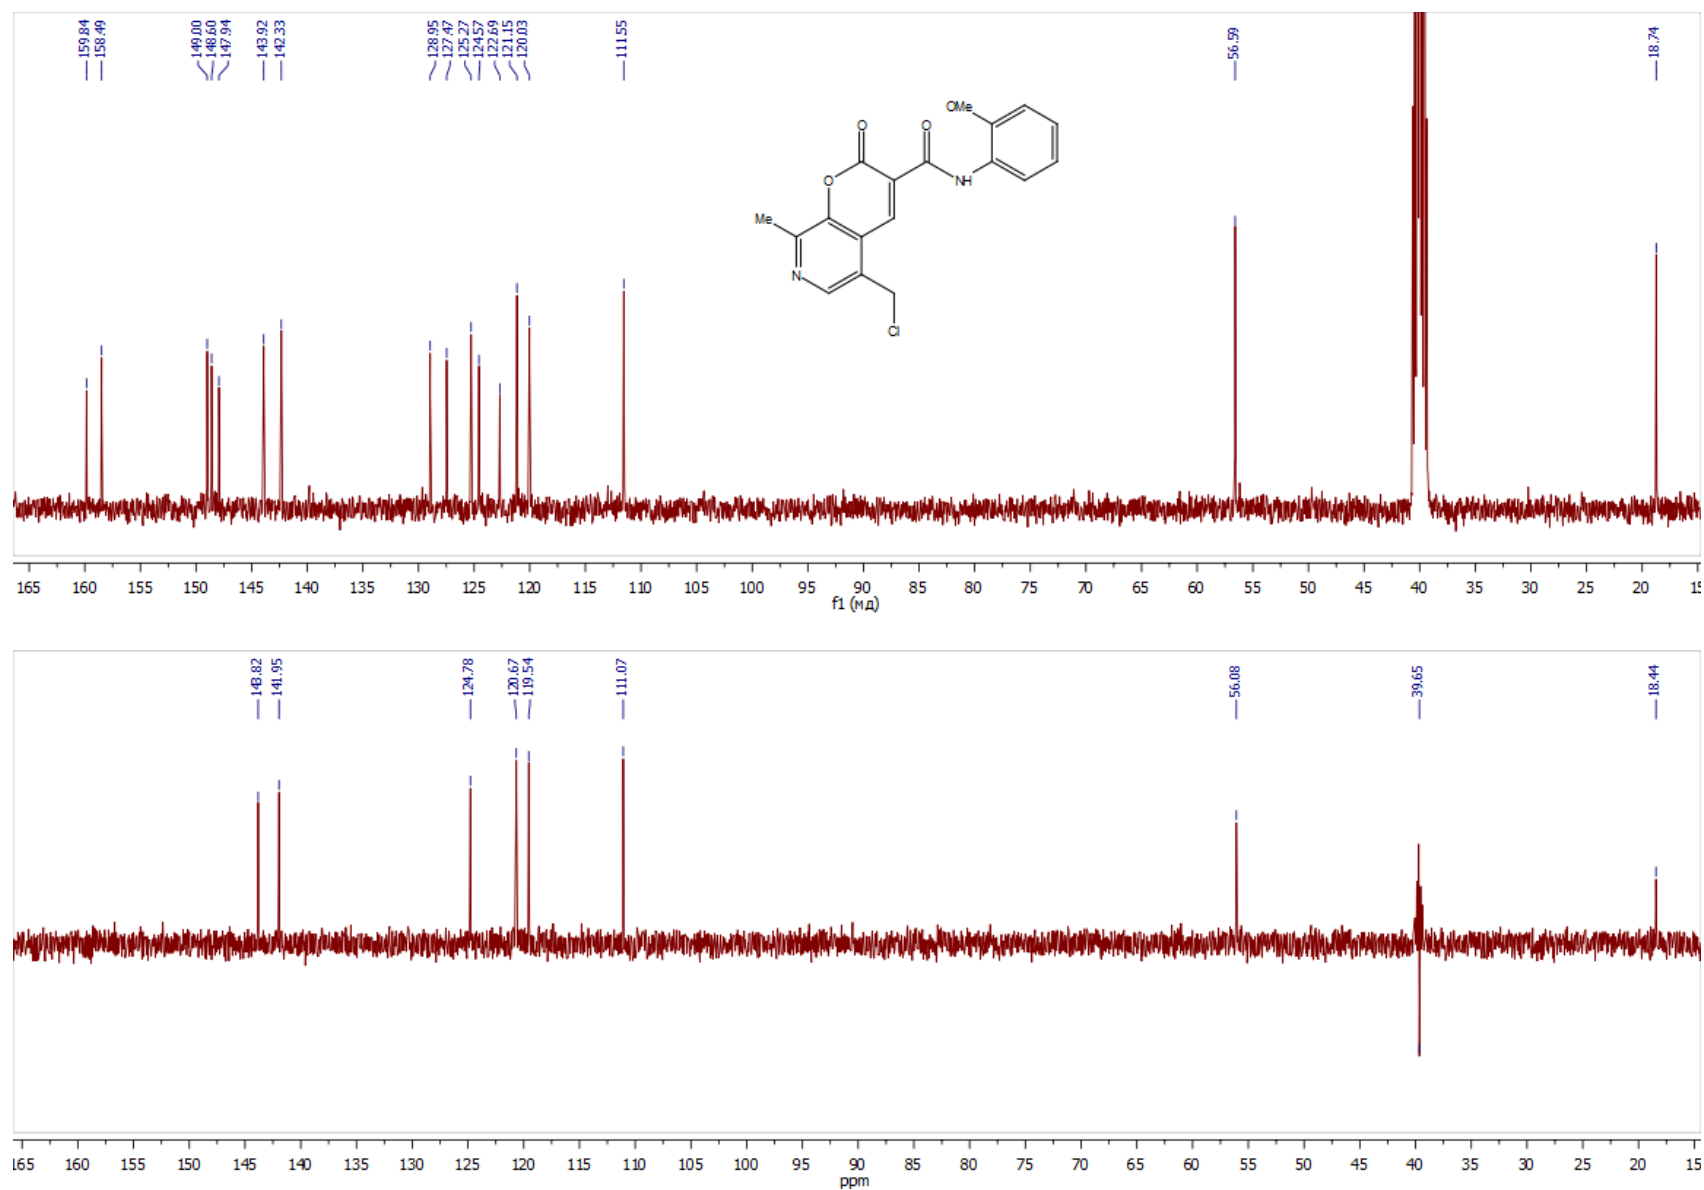

Figure S21.  $^{13}\text{C}$  NMR spectra of the compound **7b** (400 MHz,  $\text{DMSO}-d_6$ )

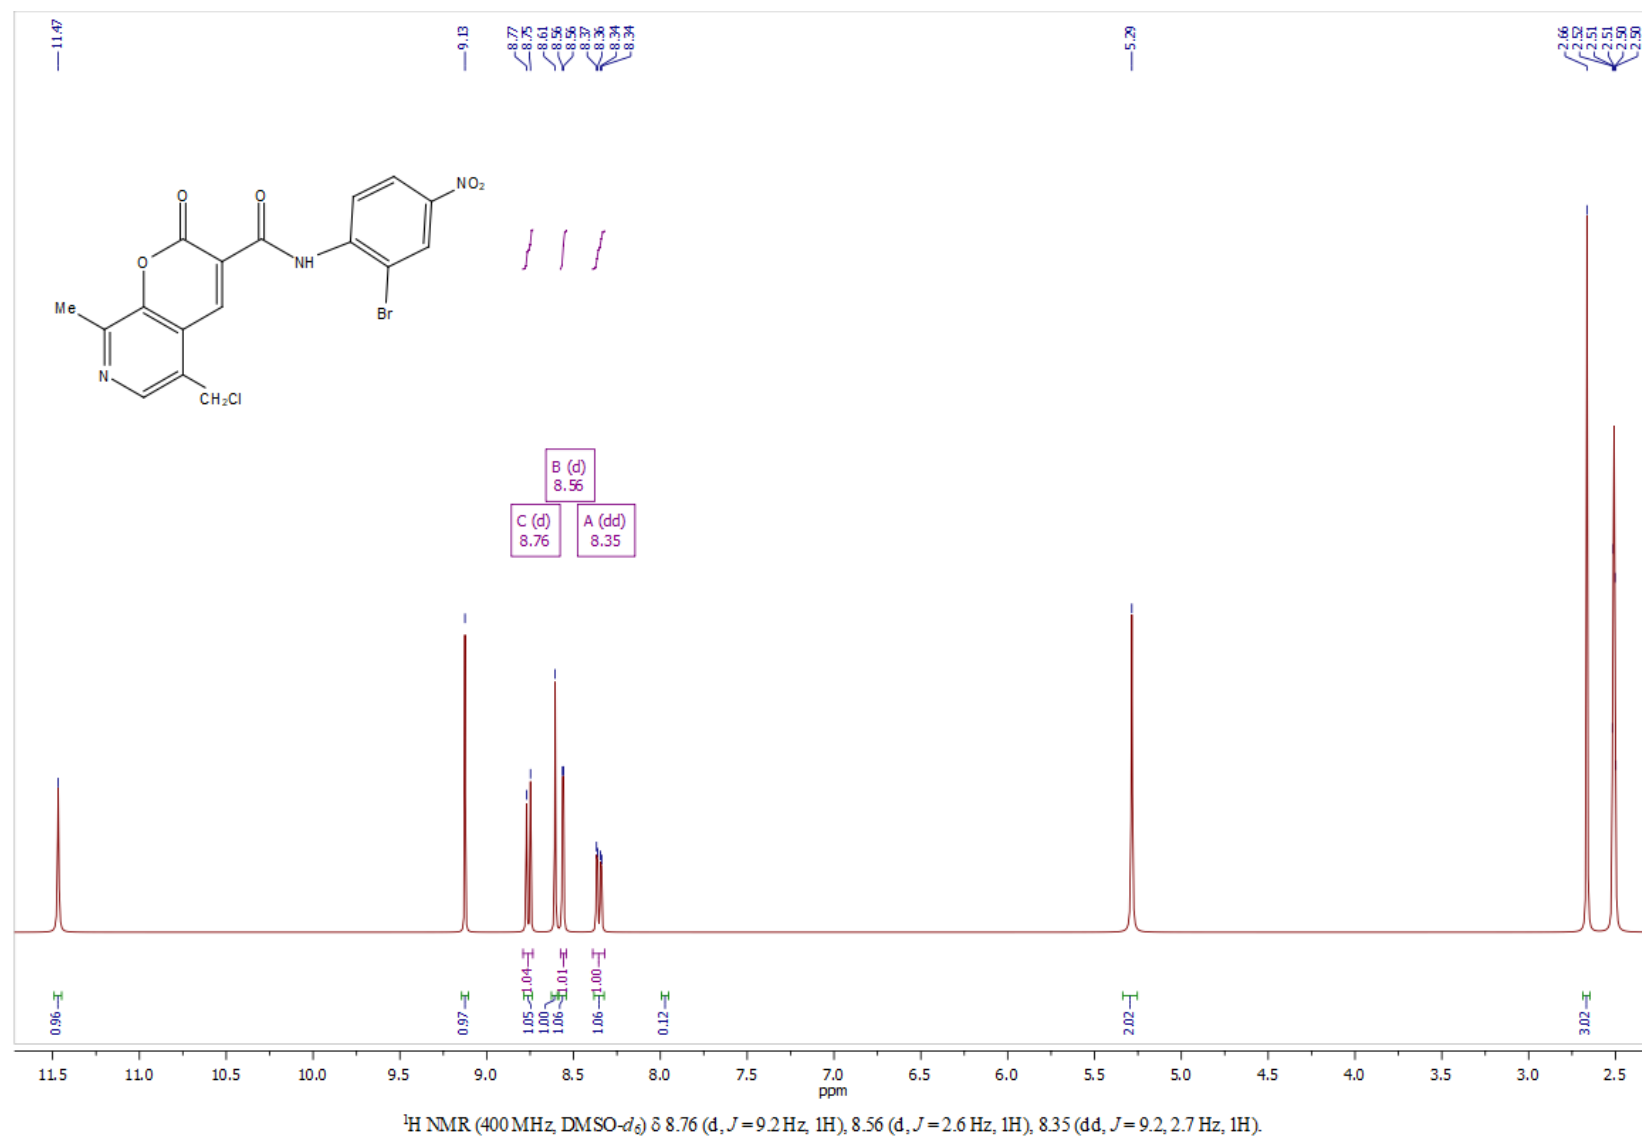

Figure S22. <sup>1</sup>H NMR spectra of the compound **7c** (400 MHz, DMSO-*d*<sub>6</sub>)

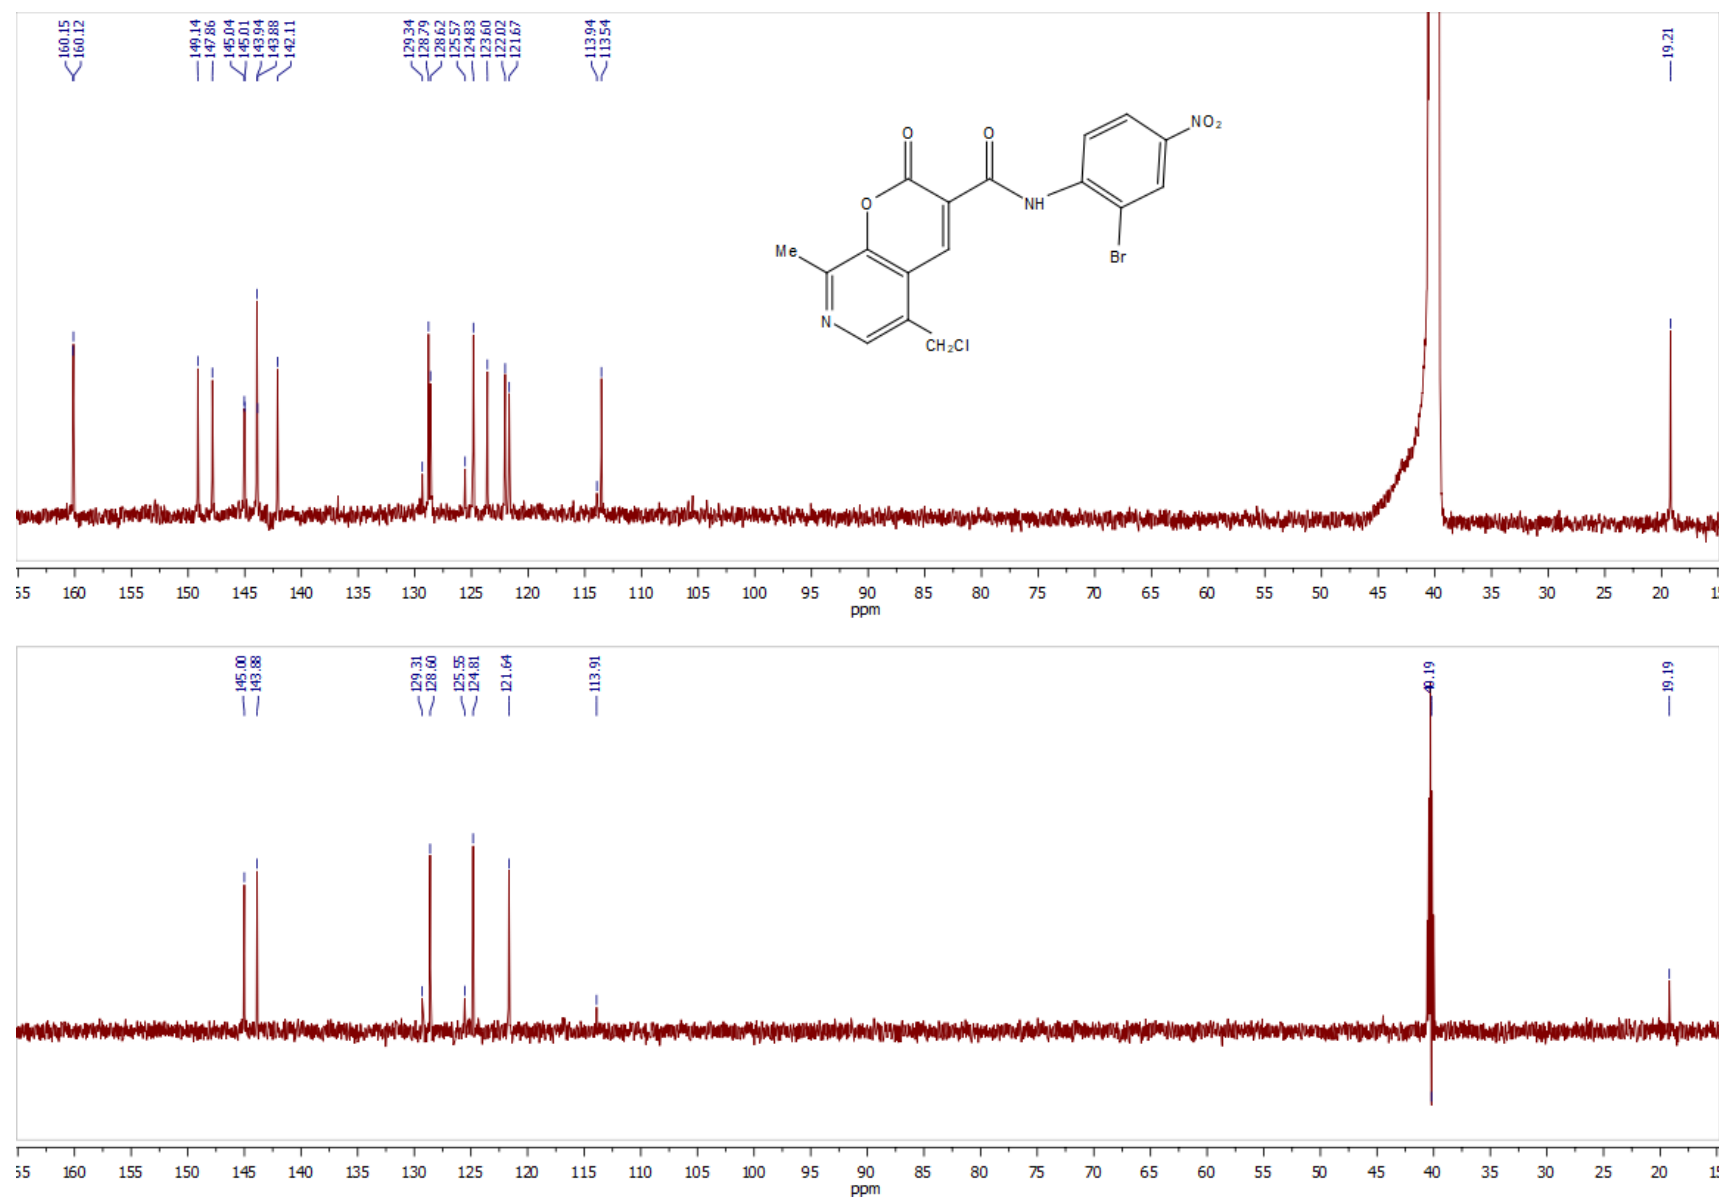

Figure S23.  $^{13}\text{C}$  NMR spectra of the compound **7c** (400 MHz,  $\text{DMSO}-d_6$ )



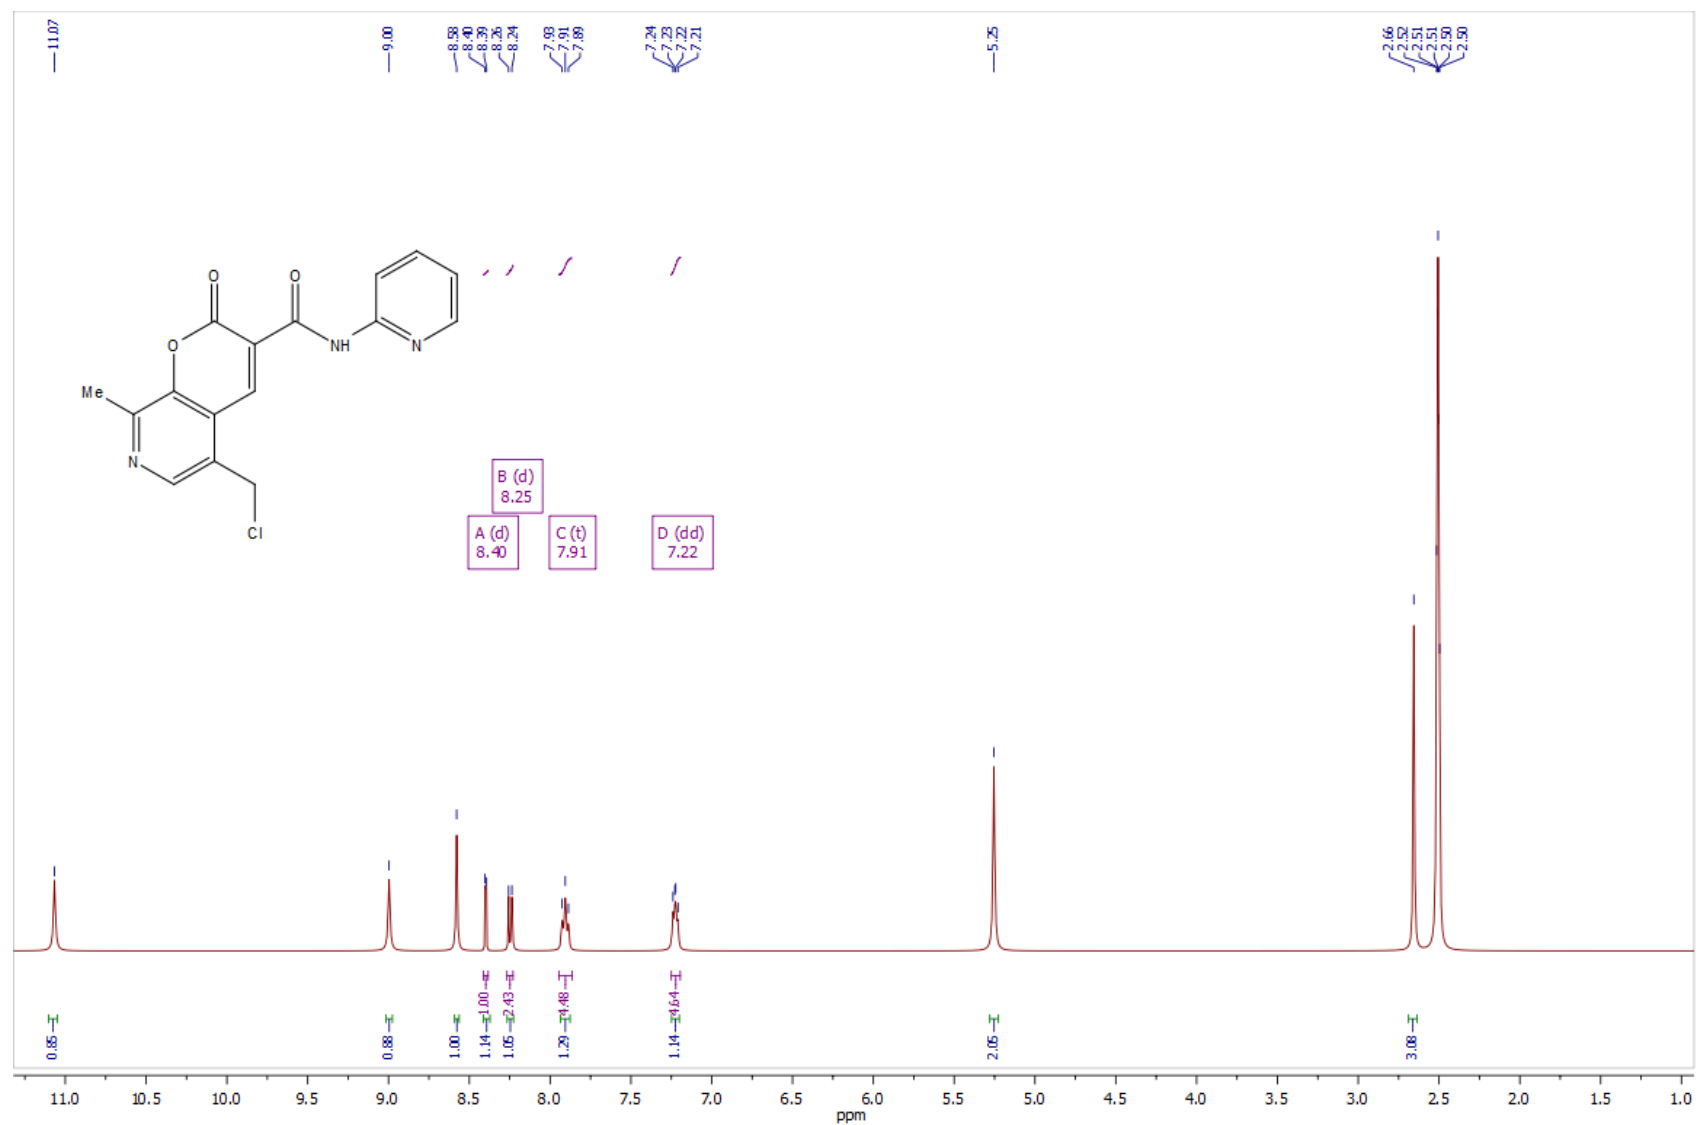

<sup>1</sup>H NMR (400 MHz, DMSO-*d*<sub>6</sub>)  $\delta$  8.40 (d,  $J$  = 4.0 Hz, 1H), 8.25 (d,  $J$  = 8.1 Hz, 2H), 7.91 (t,  $J$  = 7.9 Hz, 4H), 7.22 (dd,  $J$  = 7.2, 5.1 Hz, 5H).

Figure S24. <sup>1</sup>H NMR spectra of the compound **7d** (400 MHz, DMSO-*d*<sub>6</sub>)

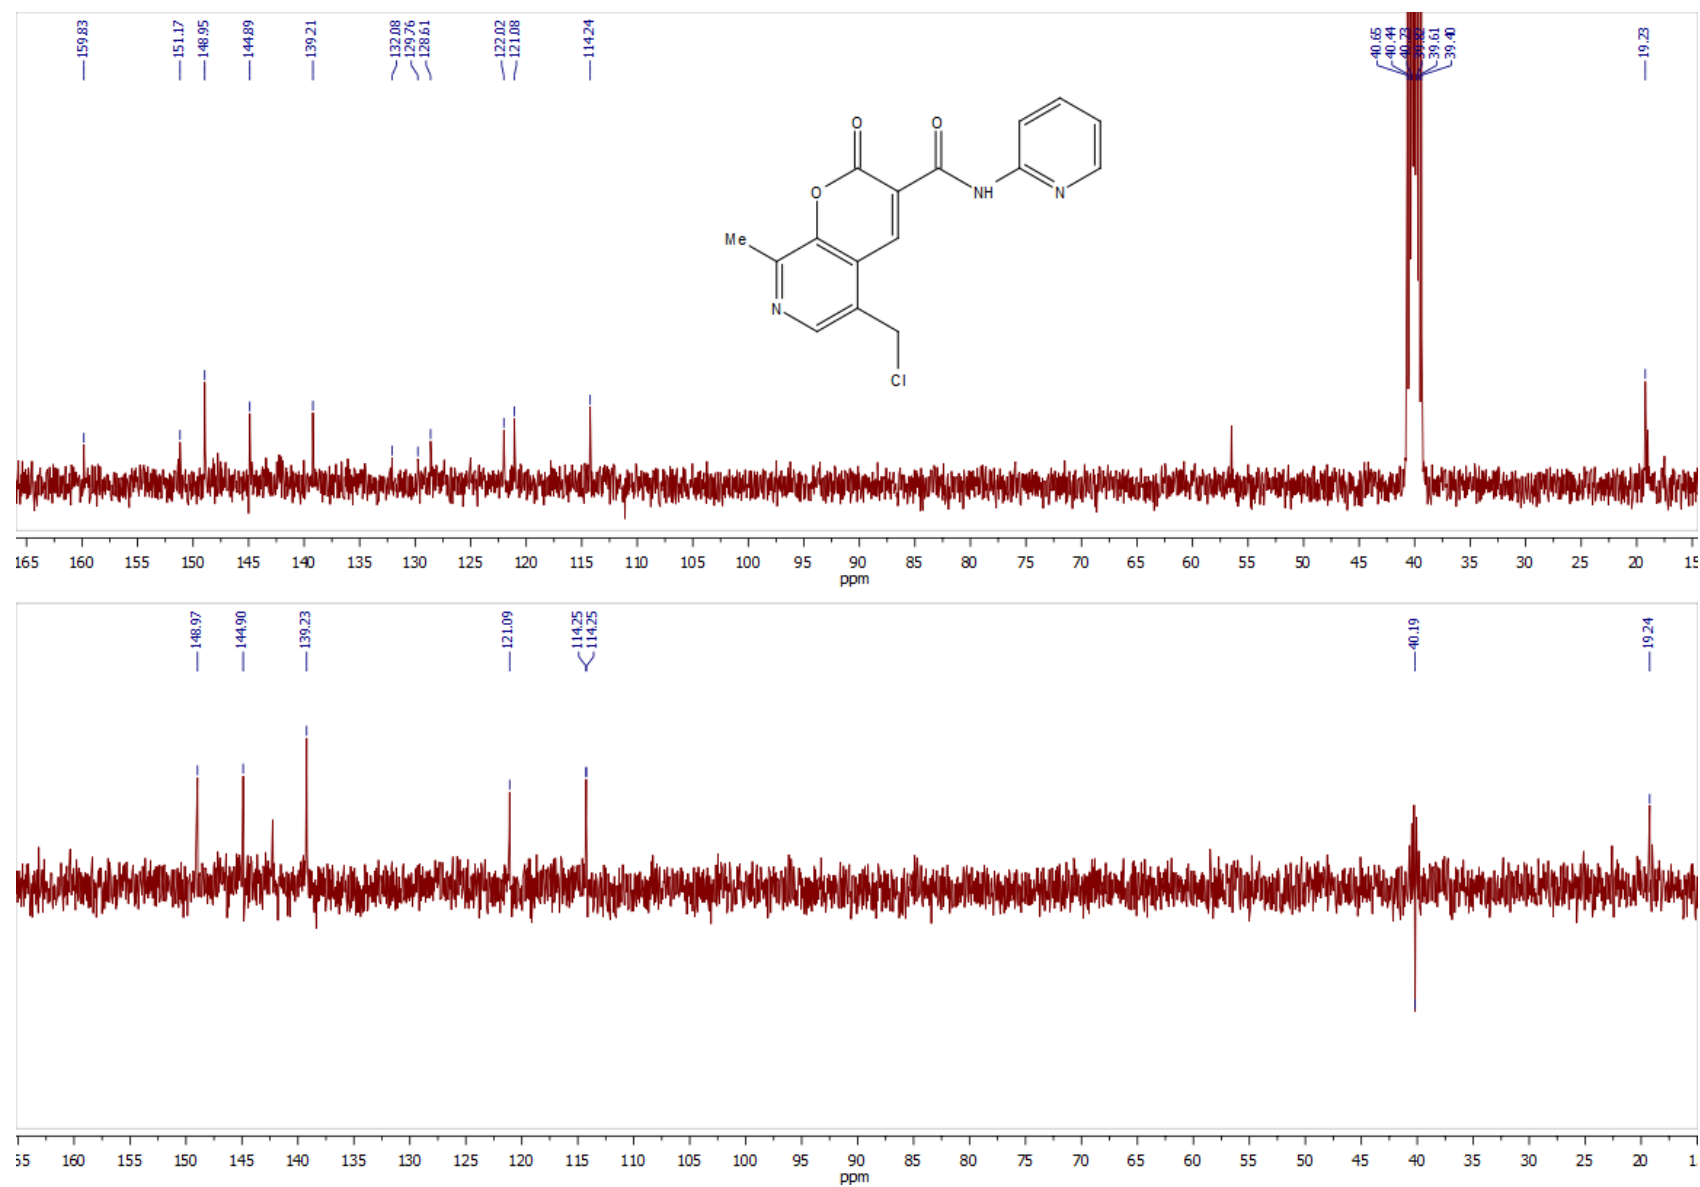

Figure S25.  $^{13}\text{C}$  NMR spectra of the compound **7d** (400 MHz,  $\text{DMSO}-d_6$ )

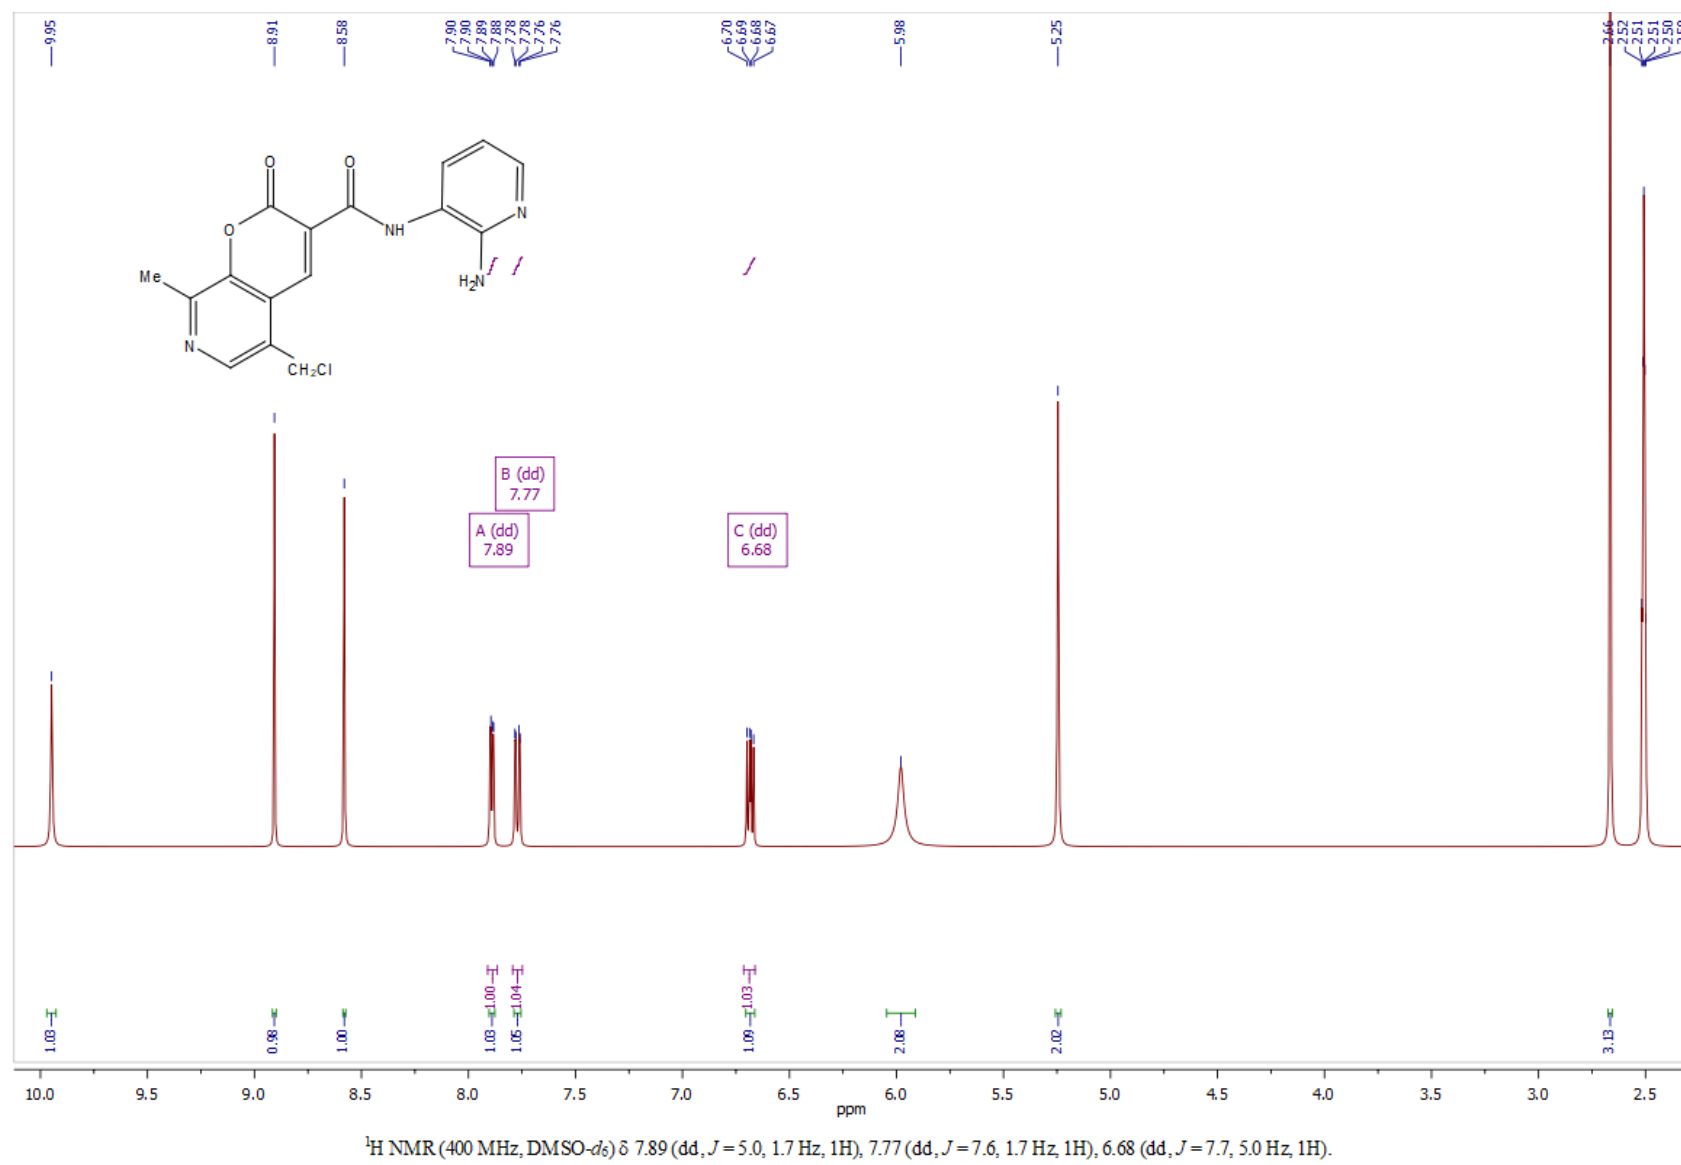

Figure S26.  $^1\text{H}$  NMR spectra of the compound **7e** (400 MHz,  $\text{DMSO}-d_6$ )

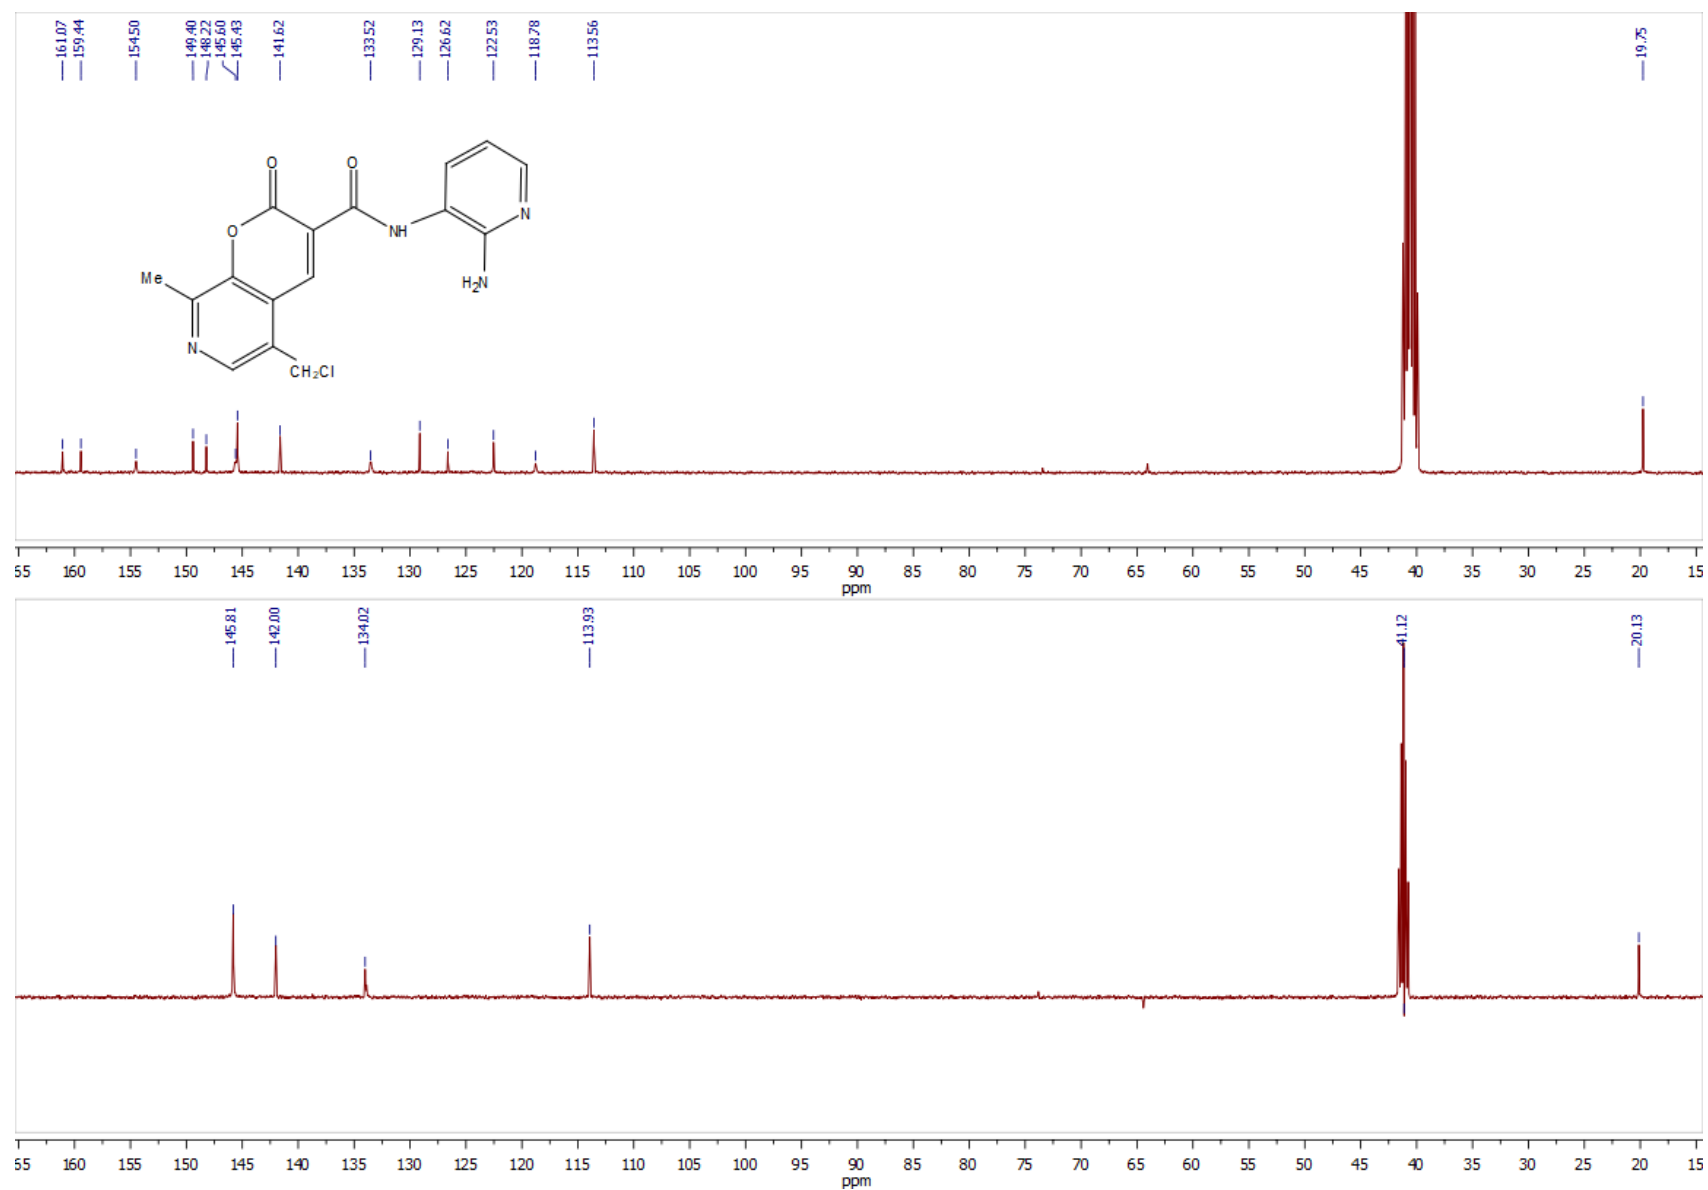

Figure S27.  $^{13}\text{C}$  NMR spectra of the compound **7e** (400 MHz,  $\text{DMSO}-d_6$ )

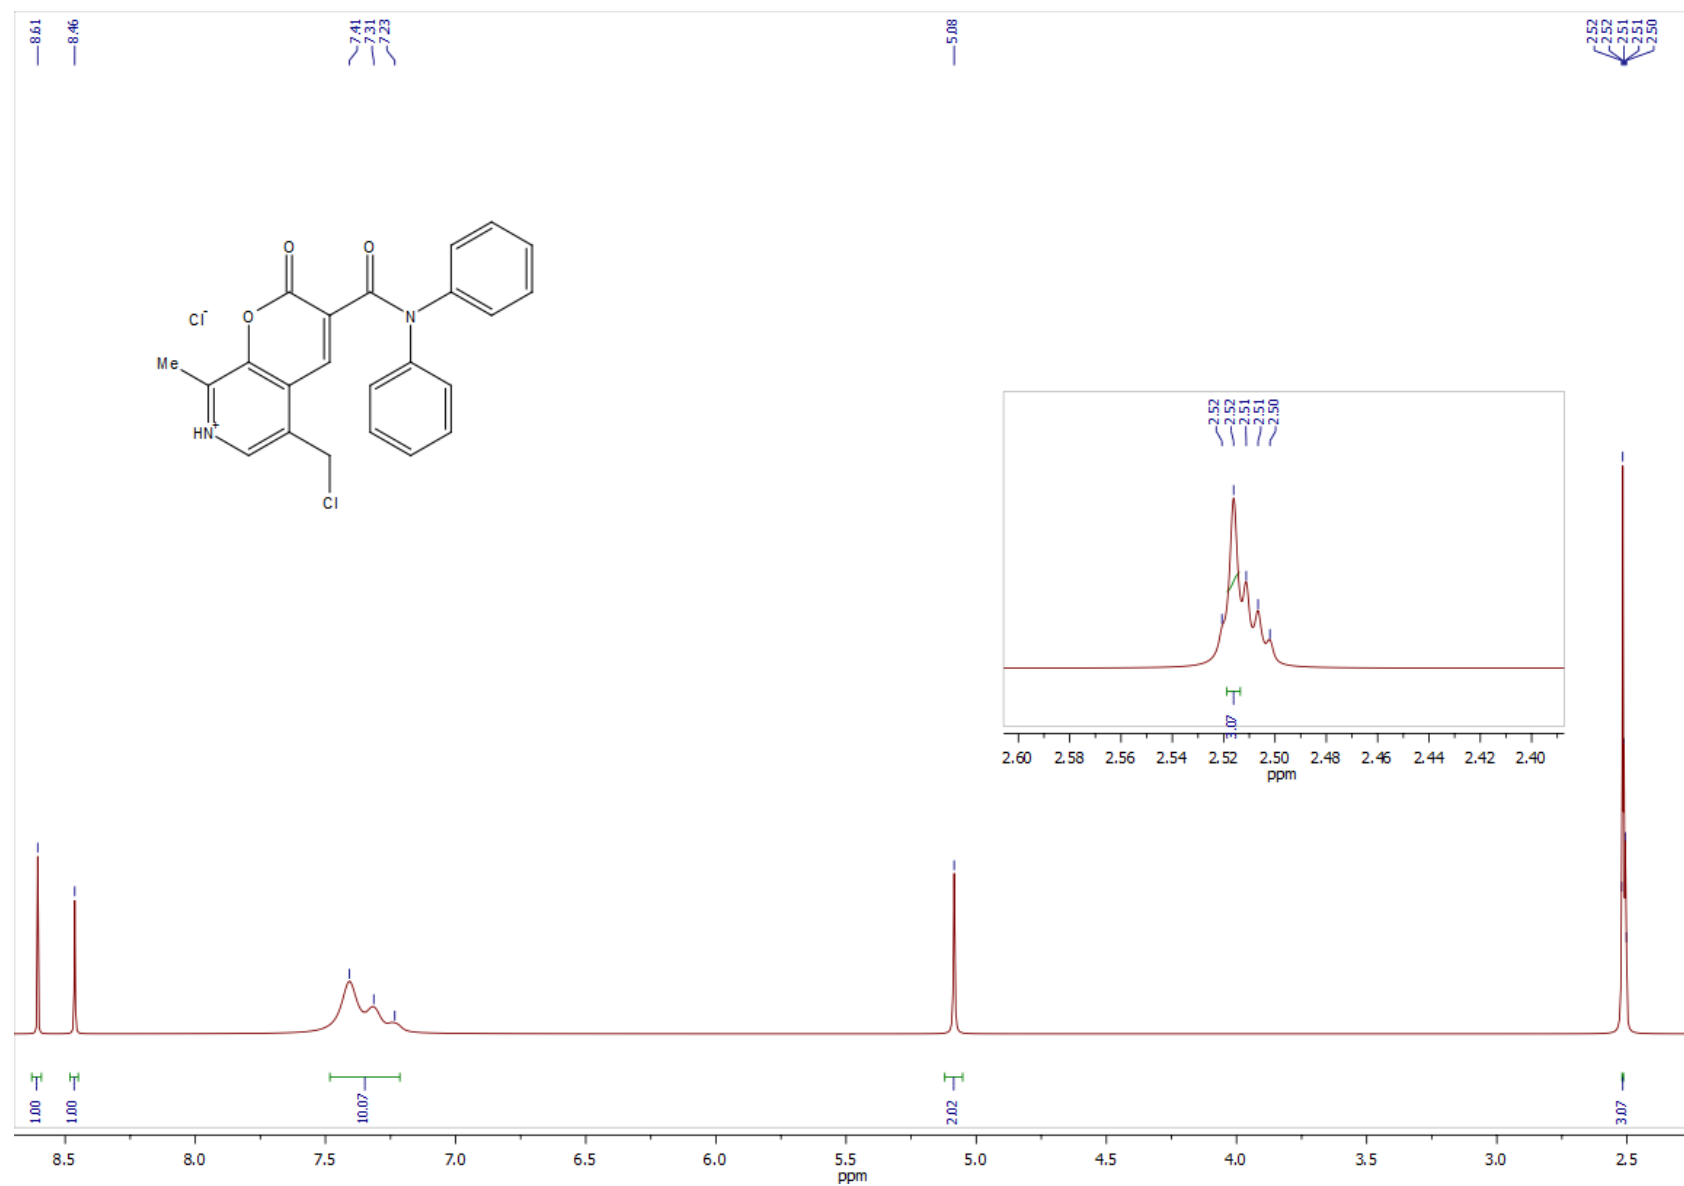

Figure S28. <sup>1</sup>H NMR spectra of the compound **7f** (400 MHz, DMSO-*d*<sub>6</sub>)

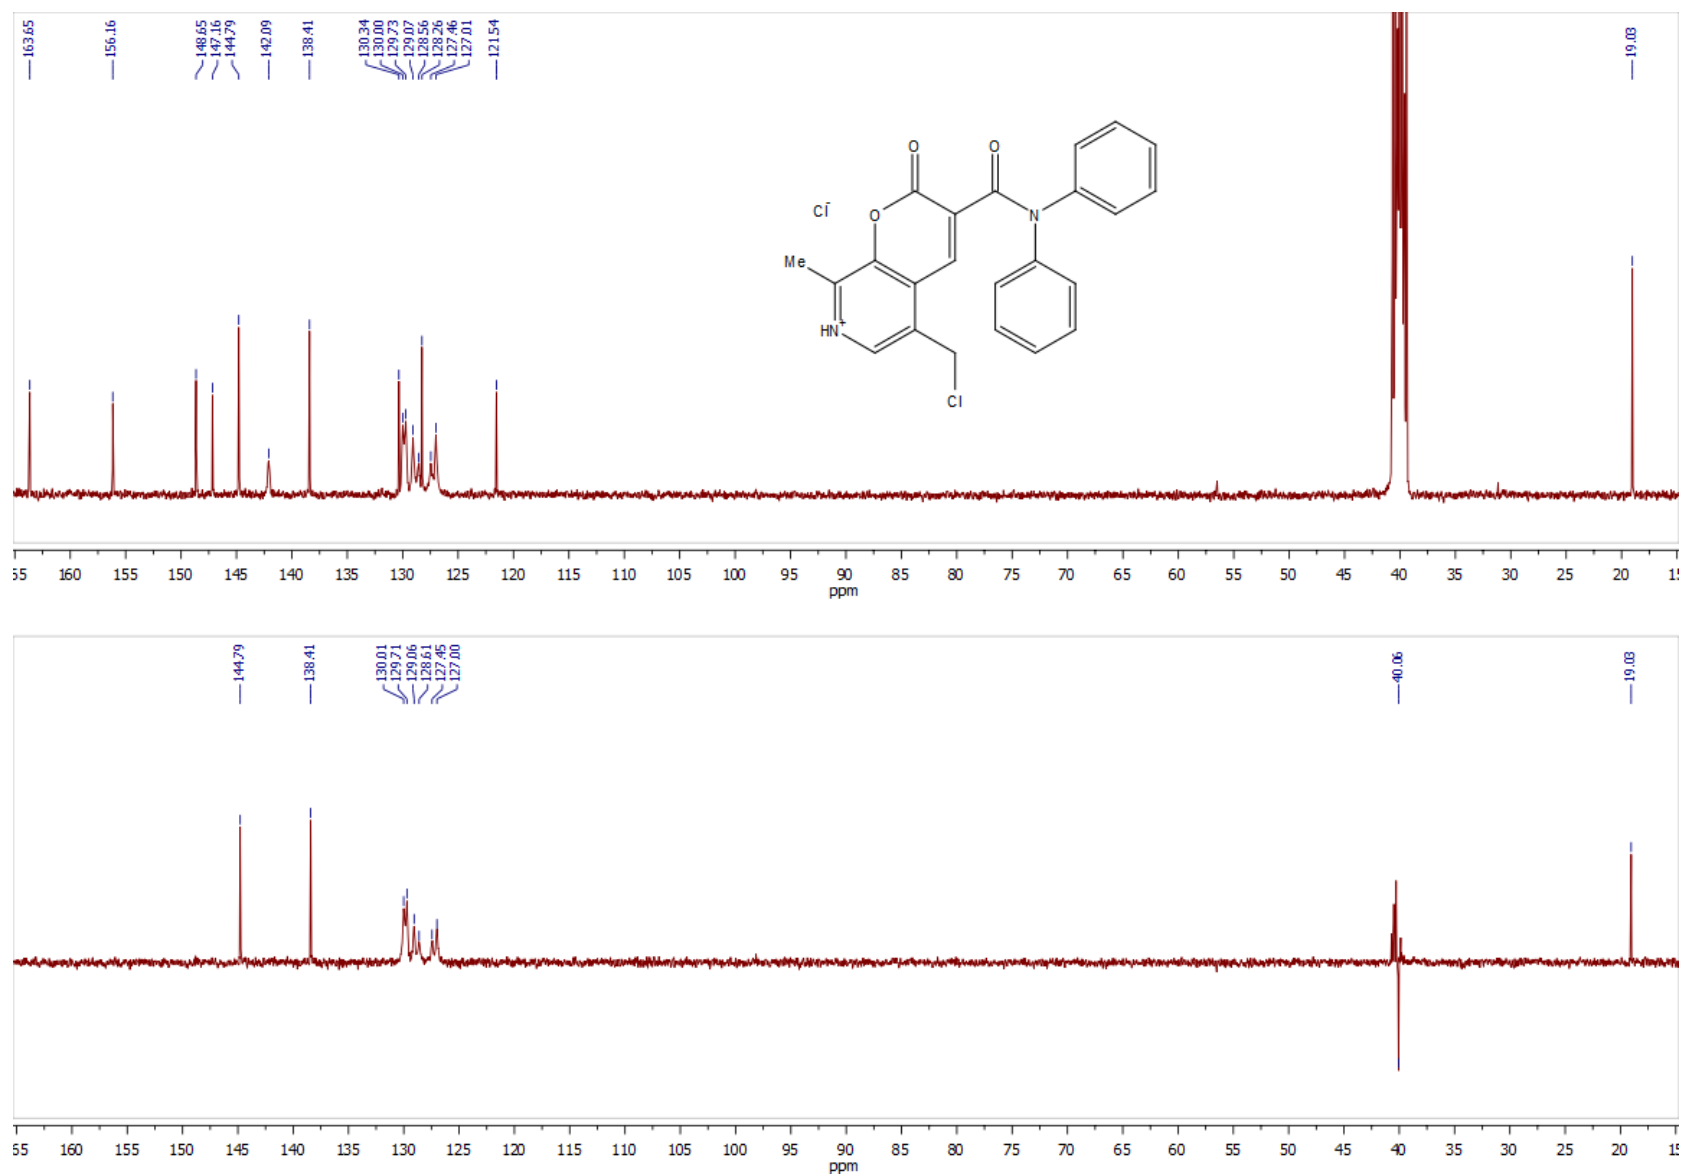

Figure S29.  $^{13}\text{C}$  NMR spectra of the compound **7f** (400 MHz,  $\text{DMSO}-d_6$ )

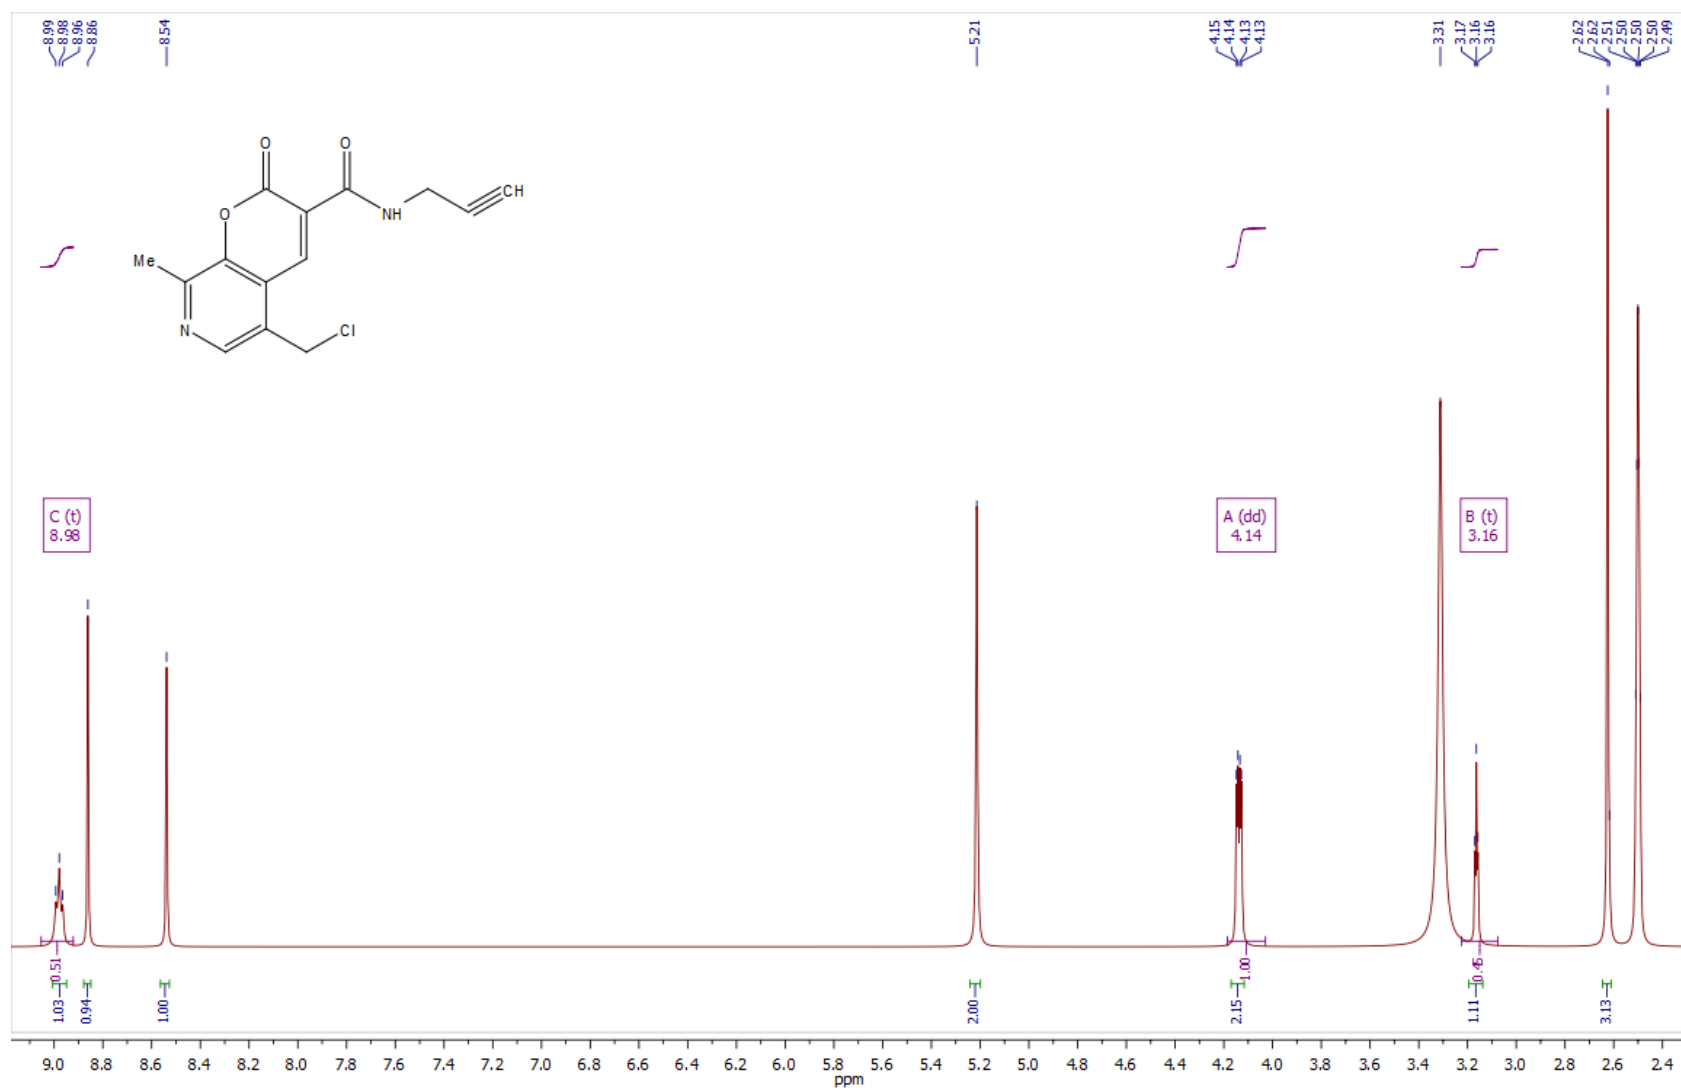

<sup>1</sup>H NMR (400 MHz, DMSO-*d*<sub>6</sub>) δ 8.98 (t, *J* = 5.7 Hz, 1H), 4.14 (dd, *J* = 5.7, 2.5 Hz, 1H), 3.16 (t, *J* = 2.5 Hz, 0H).

Figure S30. <sup>1</sup>H NMR spectra of the compound **7g** (400 MHz, DMSO-*d*<sub>6</sub>)

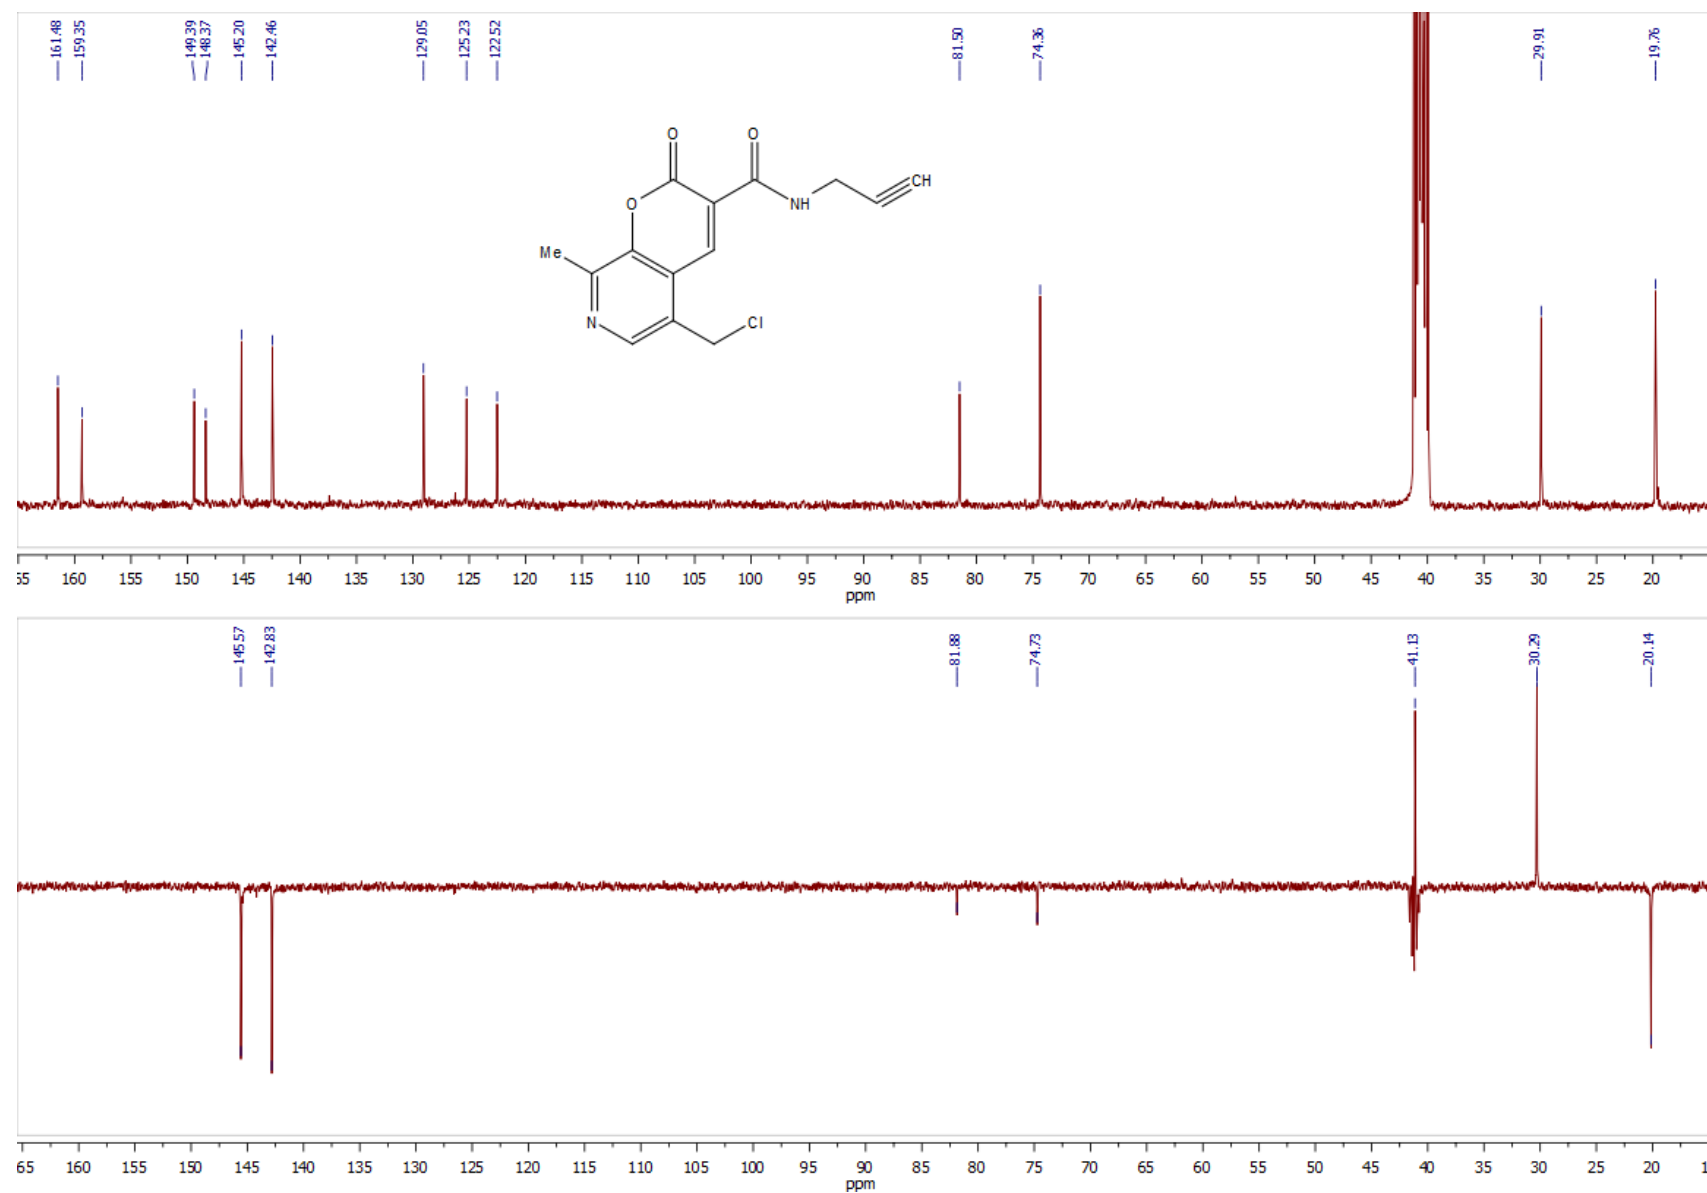

Figure S31.  $^{13}\text{C}$  NMR spectra of the compound **7g** (400 MHz,  $\text{DMSO-}d_6$ )



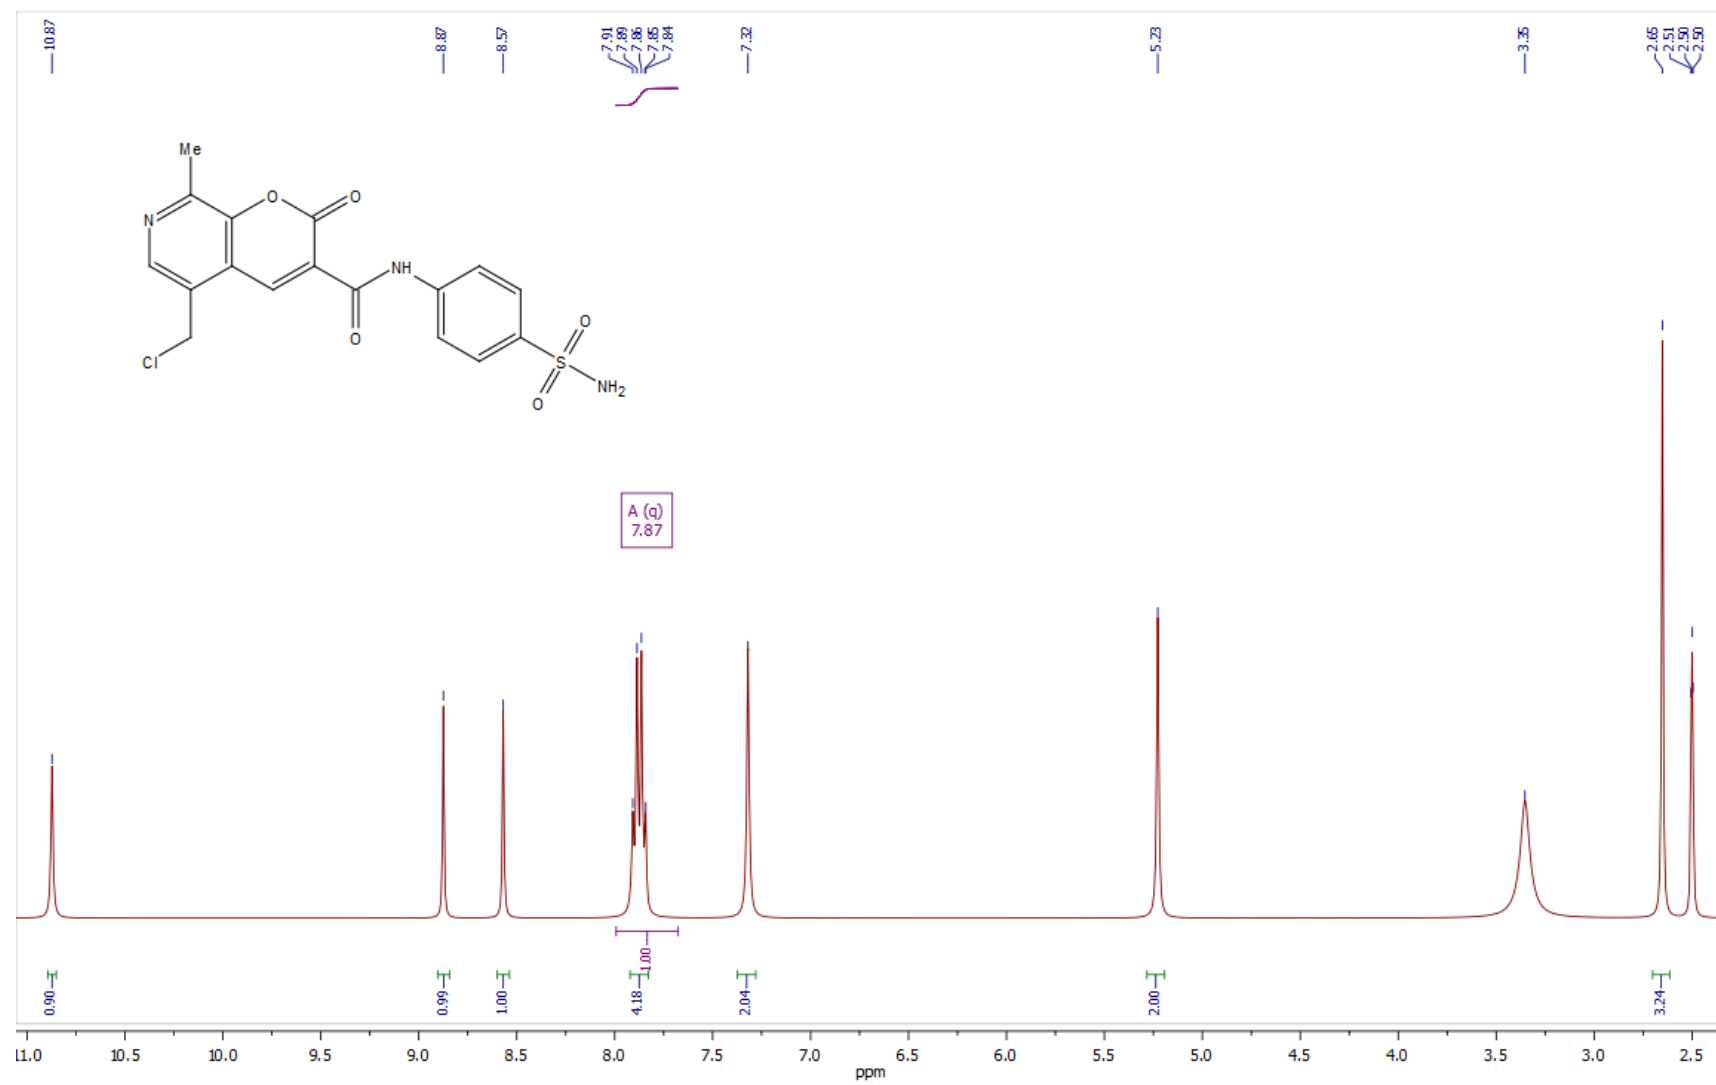

$^1\text{H}$  NMR (400 MHz,  $\text{DMSO}-d_6$ )  $\delta$  7.87 (q,  $J = 8.8$  Hz, 1H).

Figure S32.  $^1\text{H}$  NMR spectra of the compound **7h** (400 MHz,  $\text{DMSO}-d_6$ )

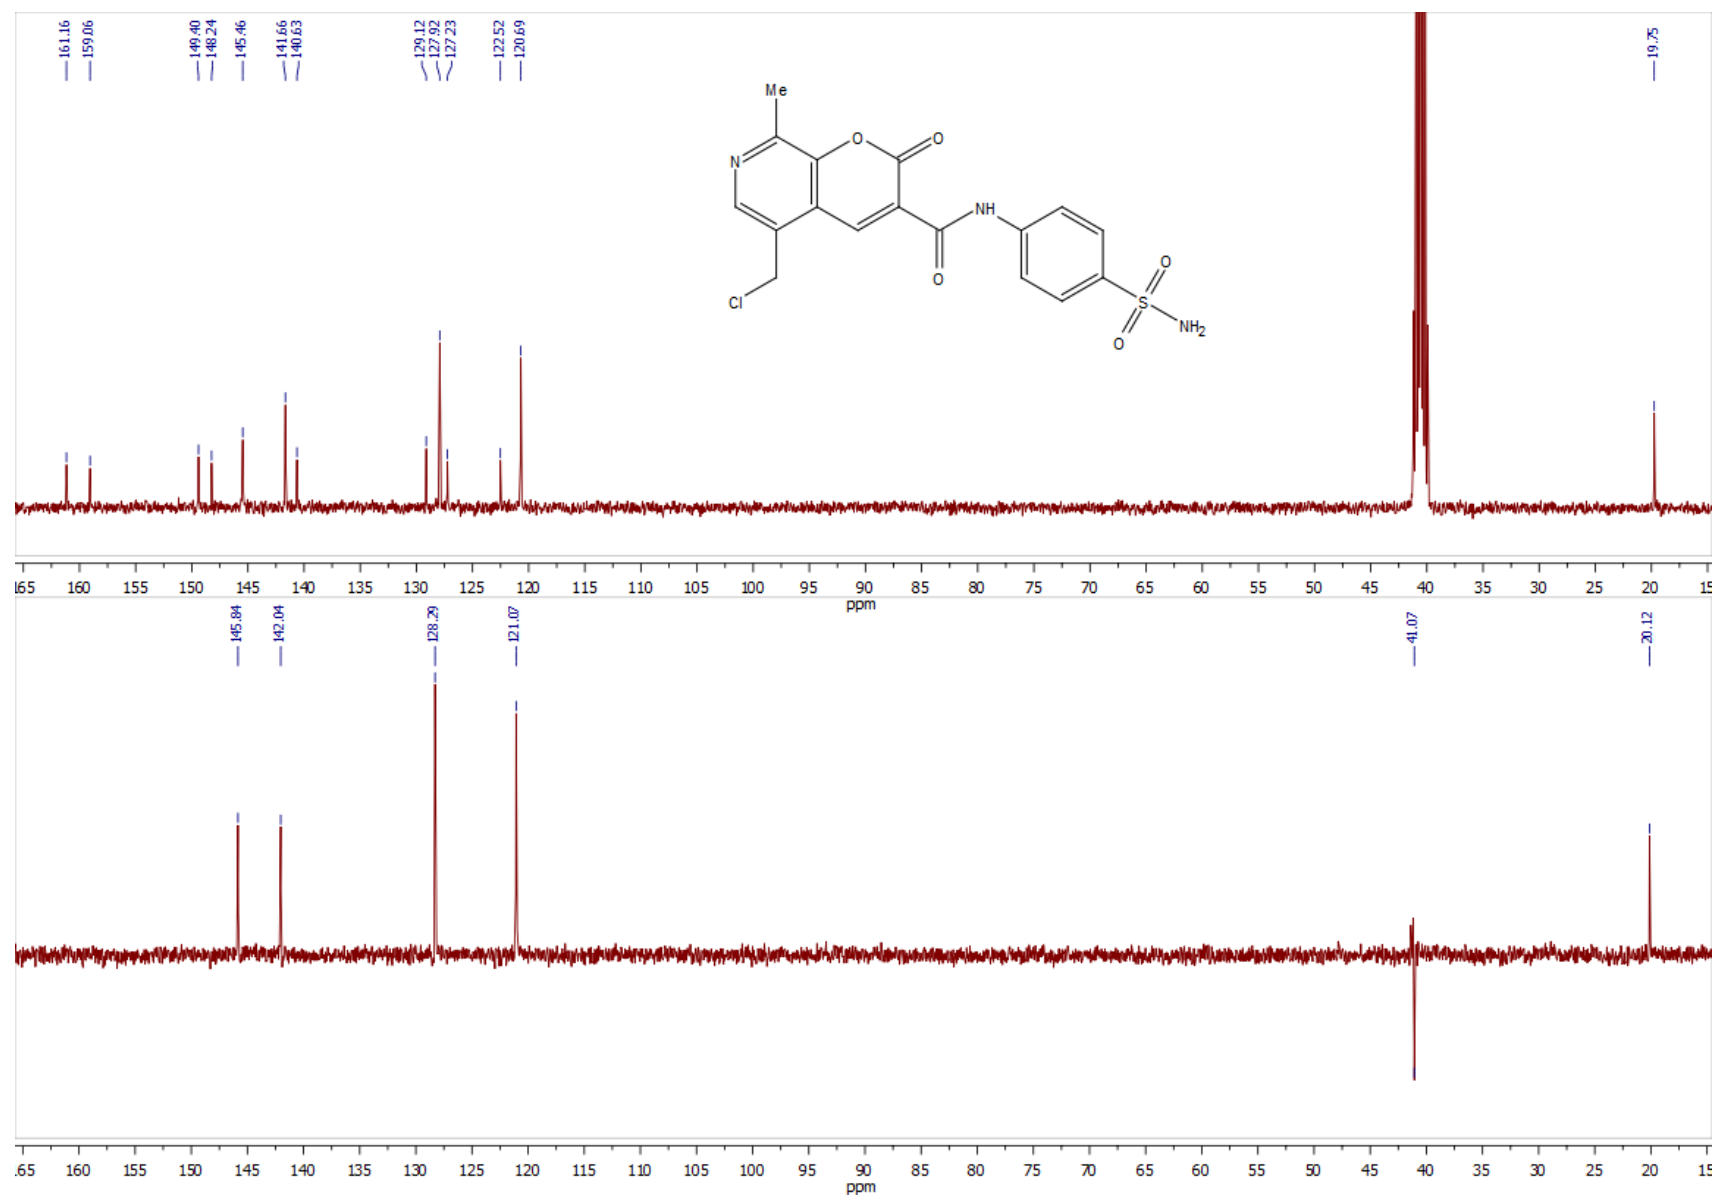

Figure S33.  $^{13}\text{C}$  NMR spectra of the compound **7h** (400 MHz,  $\text{DMSO}-d_6$ )

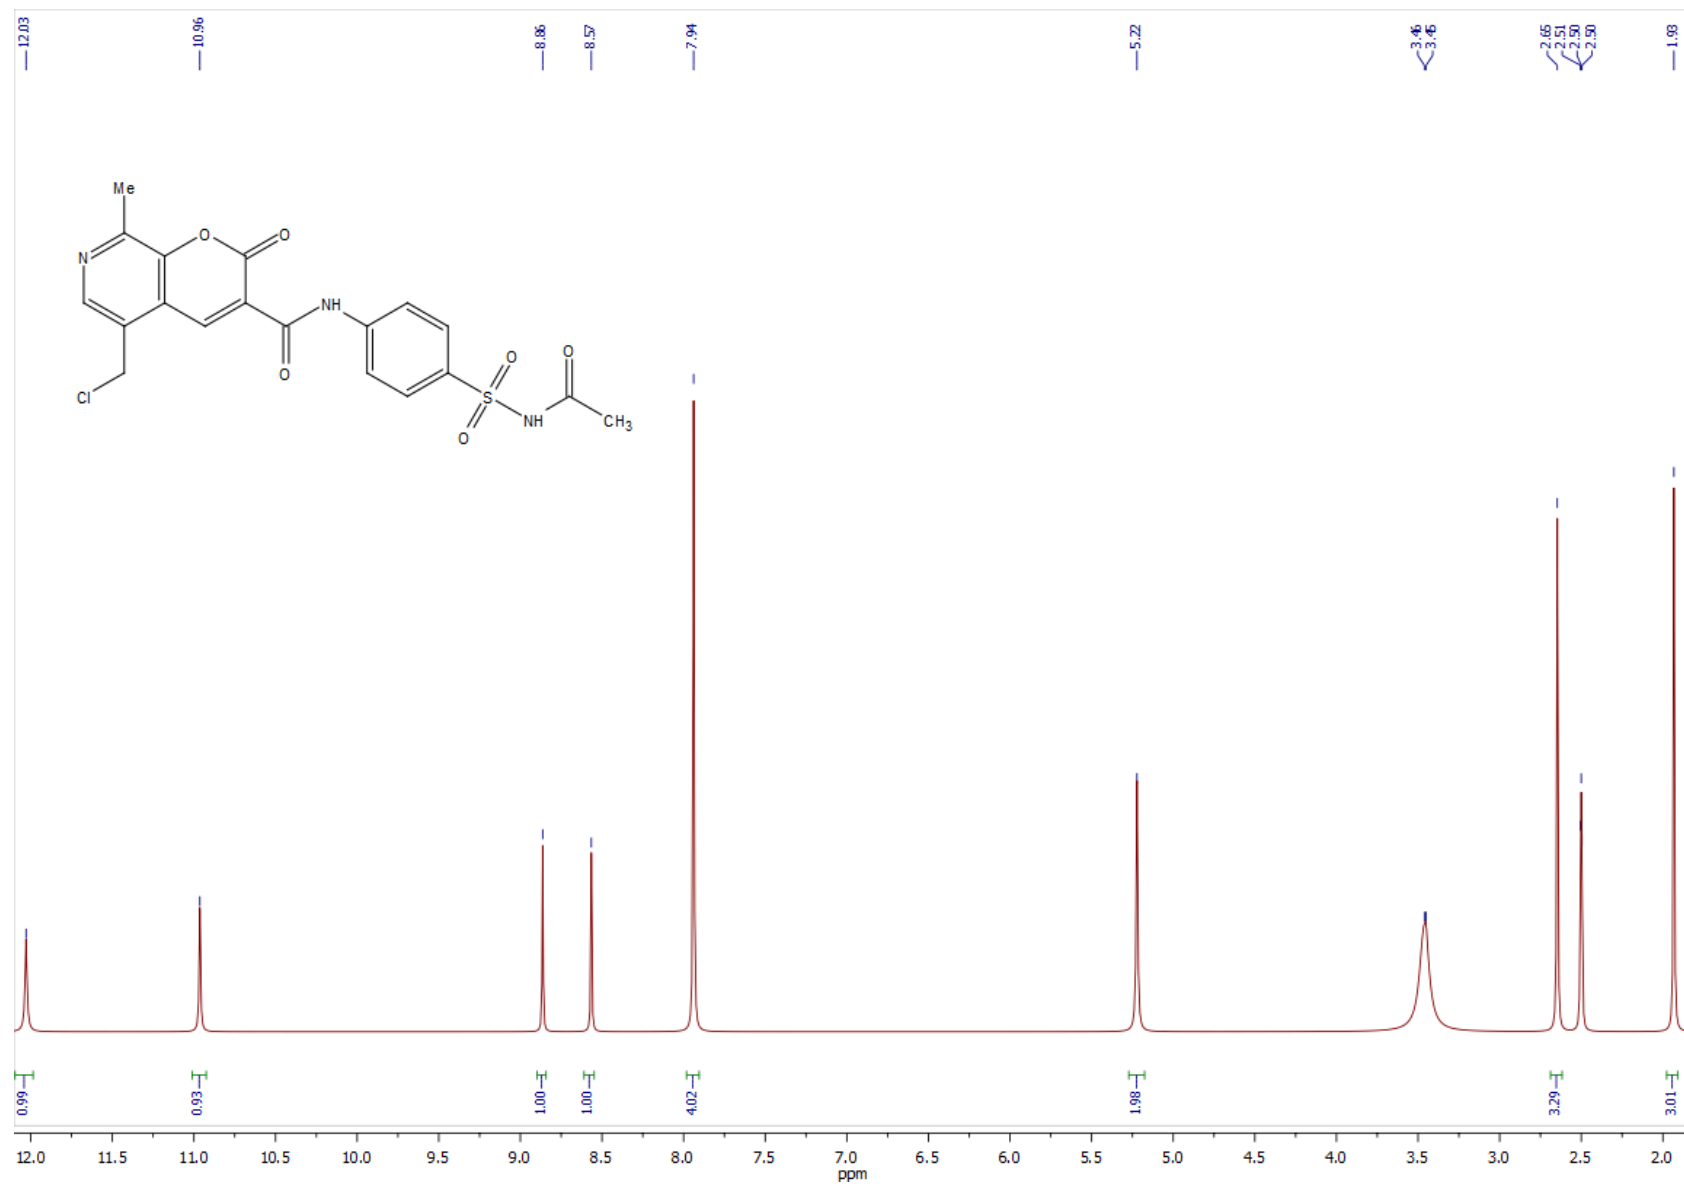

Figure S34. <sup>1</sup>H NMR spectra of the compound **7i** (400 MHz, DMSO-*d*<sub>6</sub>)

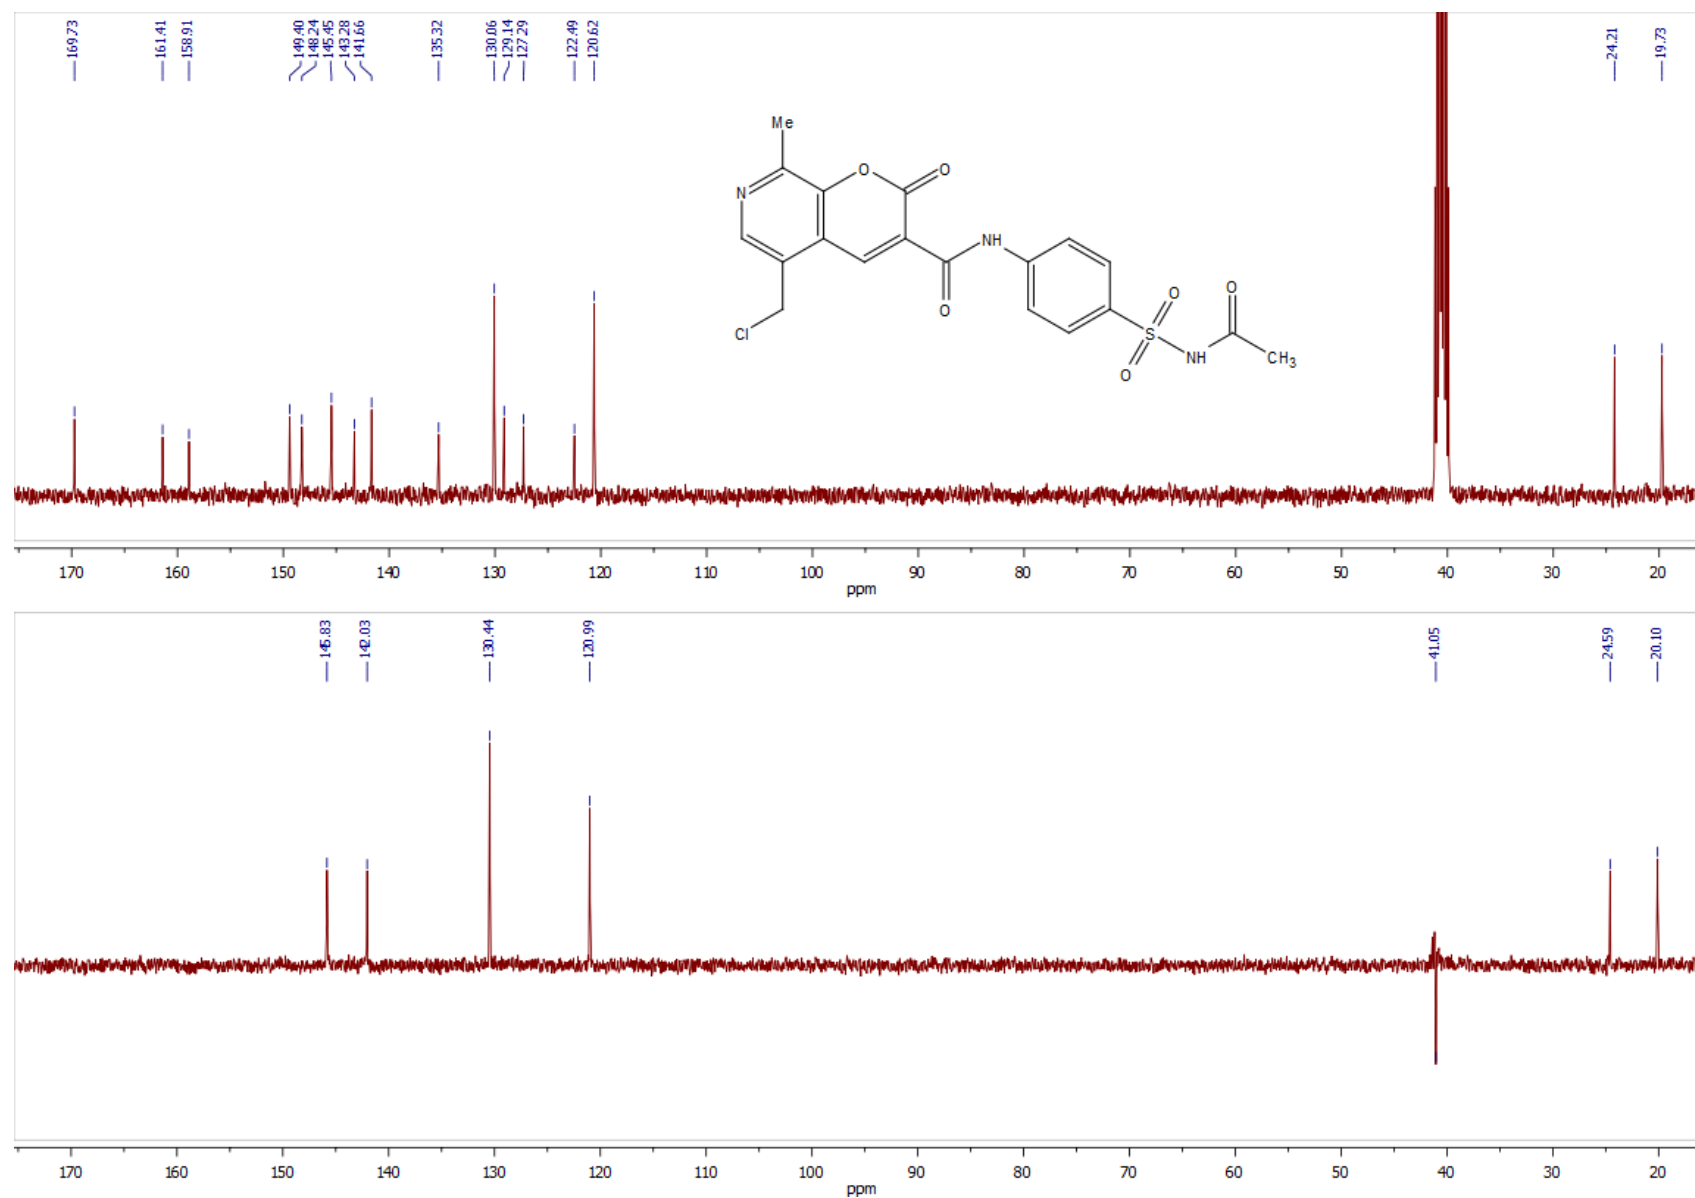

Figure S35.  $^{13}\text{C}$  NMR spectra of the compound **7i** (400 MHz,  $\text{DMSO}-d_6$ )

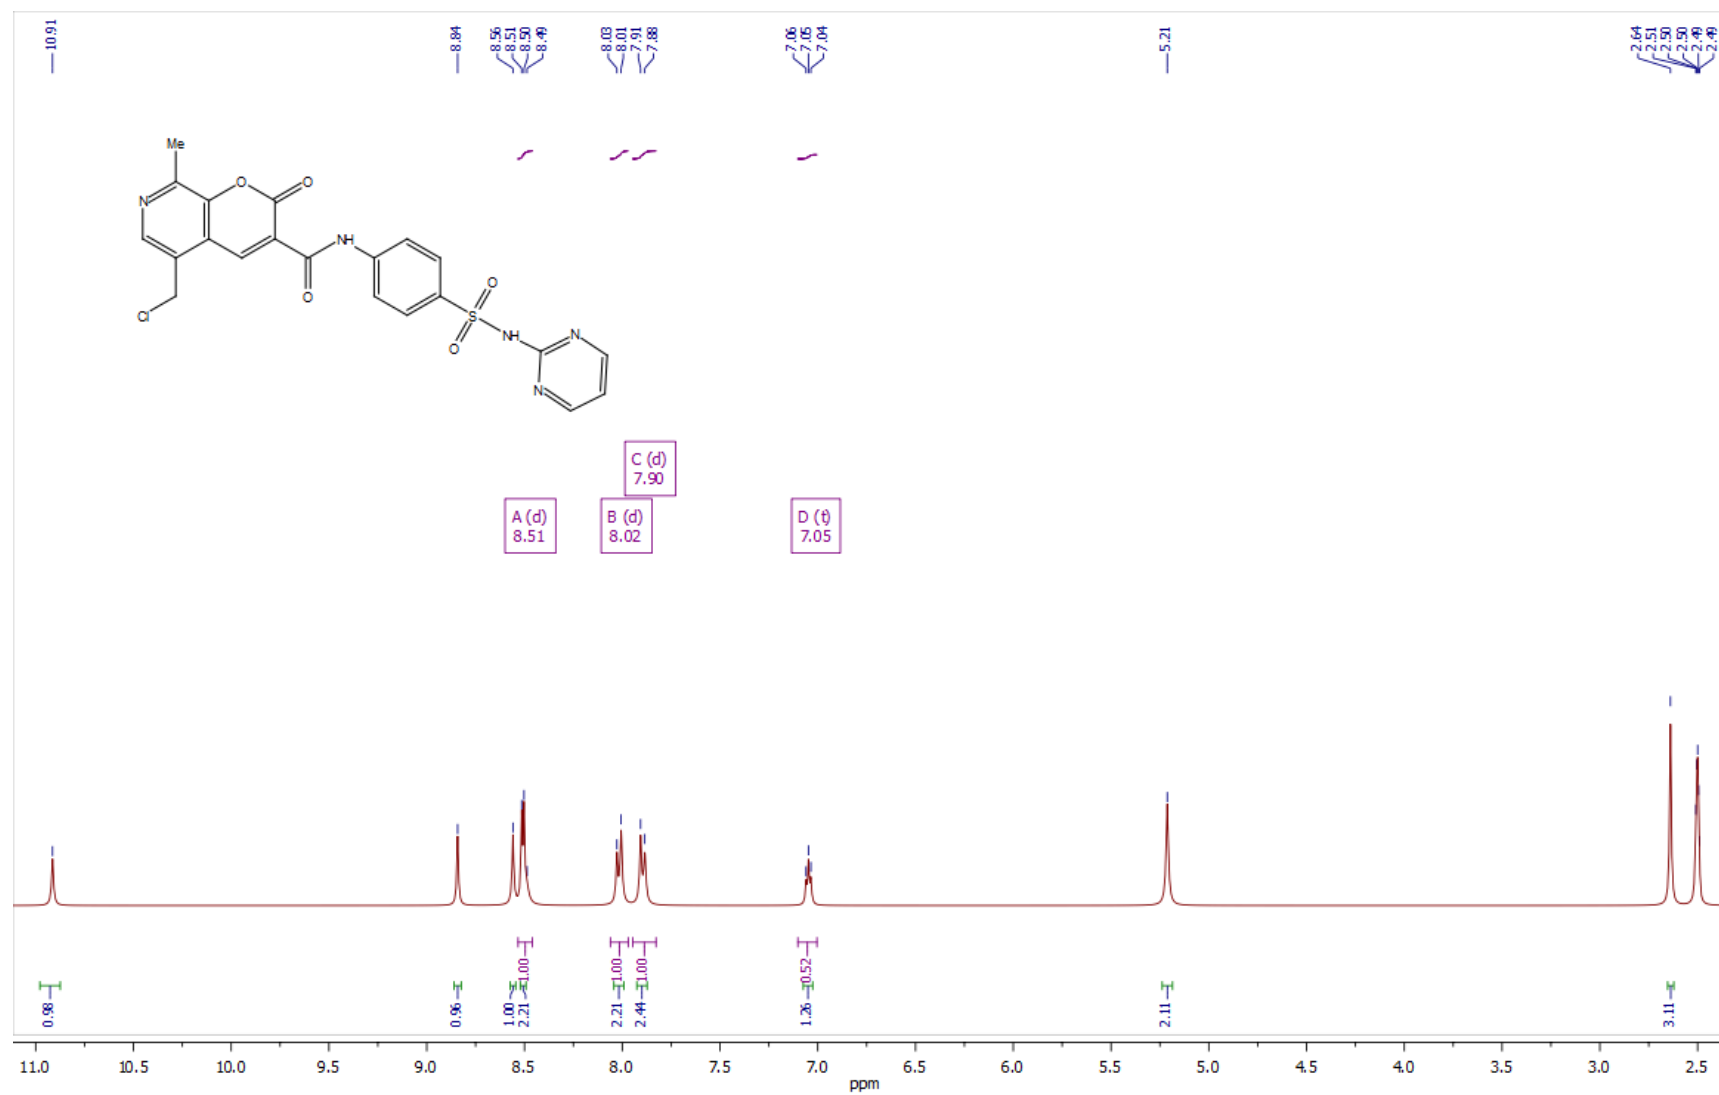

<sup>1</sup>H NMR (400 MHz, DMSO-*d*<sub>6</sub>) δ 8.51 (d, *J* = 4.9 Hz, 1H), 8.02 (d, *J* = 8.6 Hz, 1H), 7.90 (d, *J* = 8.6 Hz, 1H), 7.05 (t, *J* = 4.9 Hz, 1H).

Figure S36. <sup>1</sup>H NMR spectra of the compound **7j** (400 MHz, DMSO-*d*<sub>6</sub>)

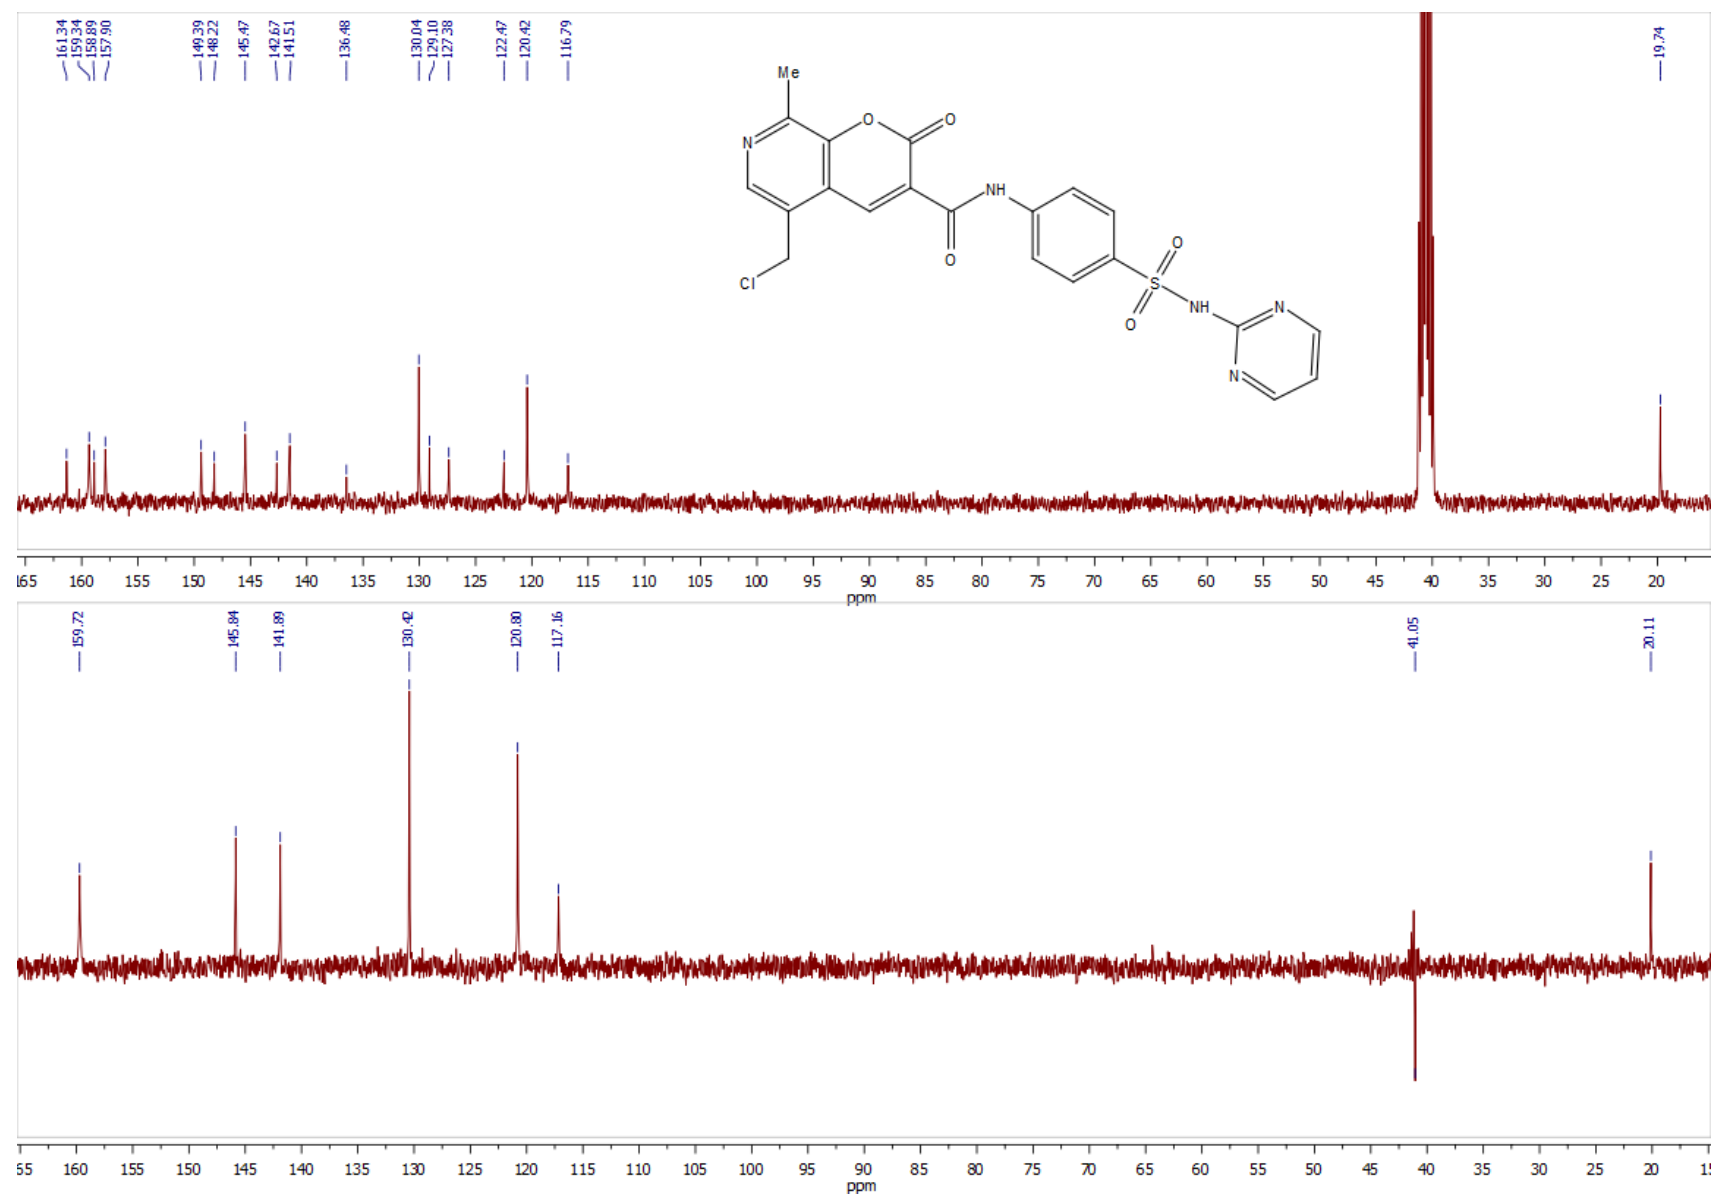

Figure S37.  $^{13}\text{C}$  NMR spectra of the compound **7j** (400 MHz,  $\text{DMSO}-d_6$ )

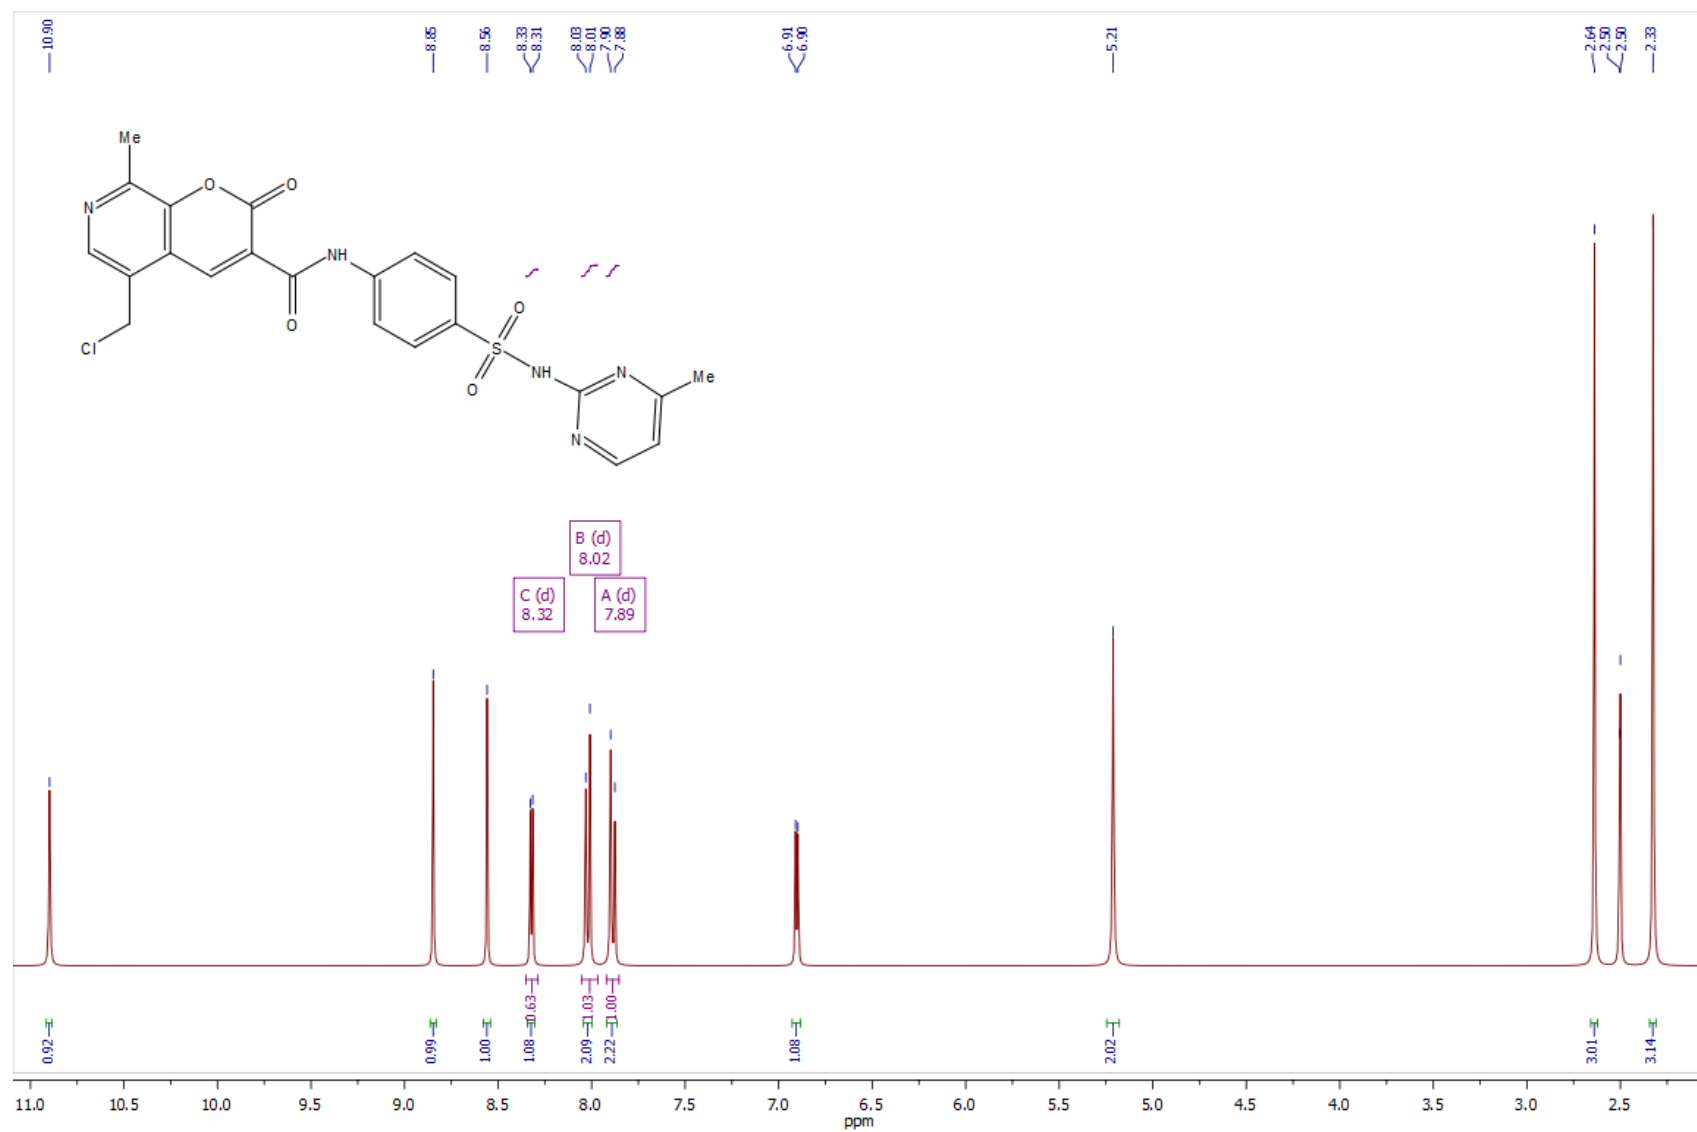

<sup>1</sup>H NMR (400 MHz, DMSO-*d*<sub>6</sub>) δ 8.32 (d, *J* = 5.1 Hz, 1H), 8.02 (d, *J* = 8.8 Hz, 1H), 7.89 (d, *J* = 8.9 Hz, 1H).

Figure S38. <sup>1</sup>H NMR spectra of the compound **7k** (400 MHz, DMSO-*d*<sub>6</sub>)

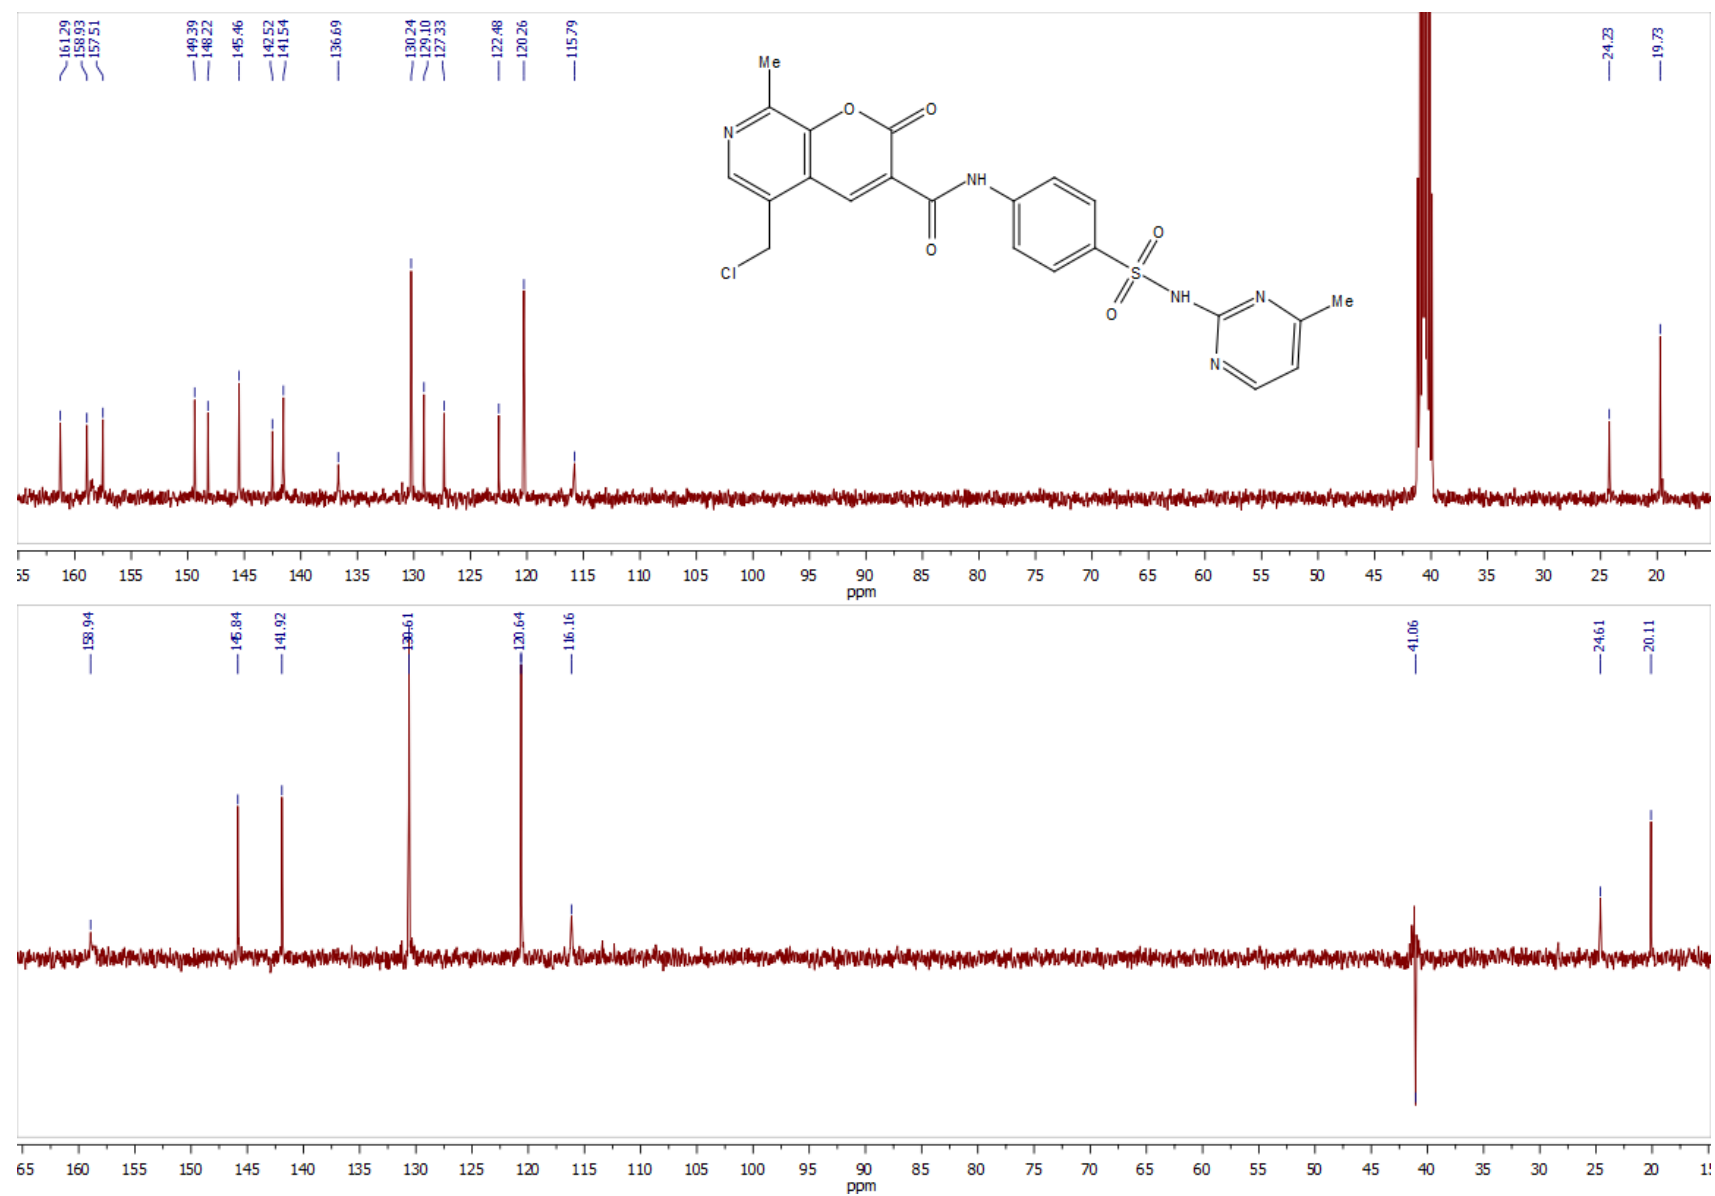

Figure S39.  $^{13}\text{C}$  NMR spectra of the compound **7k** (400 MHz,  $\text{DMSO}-d_6$ )



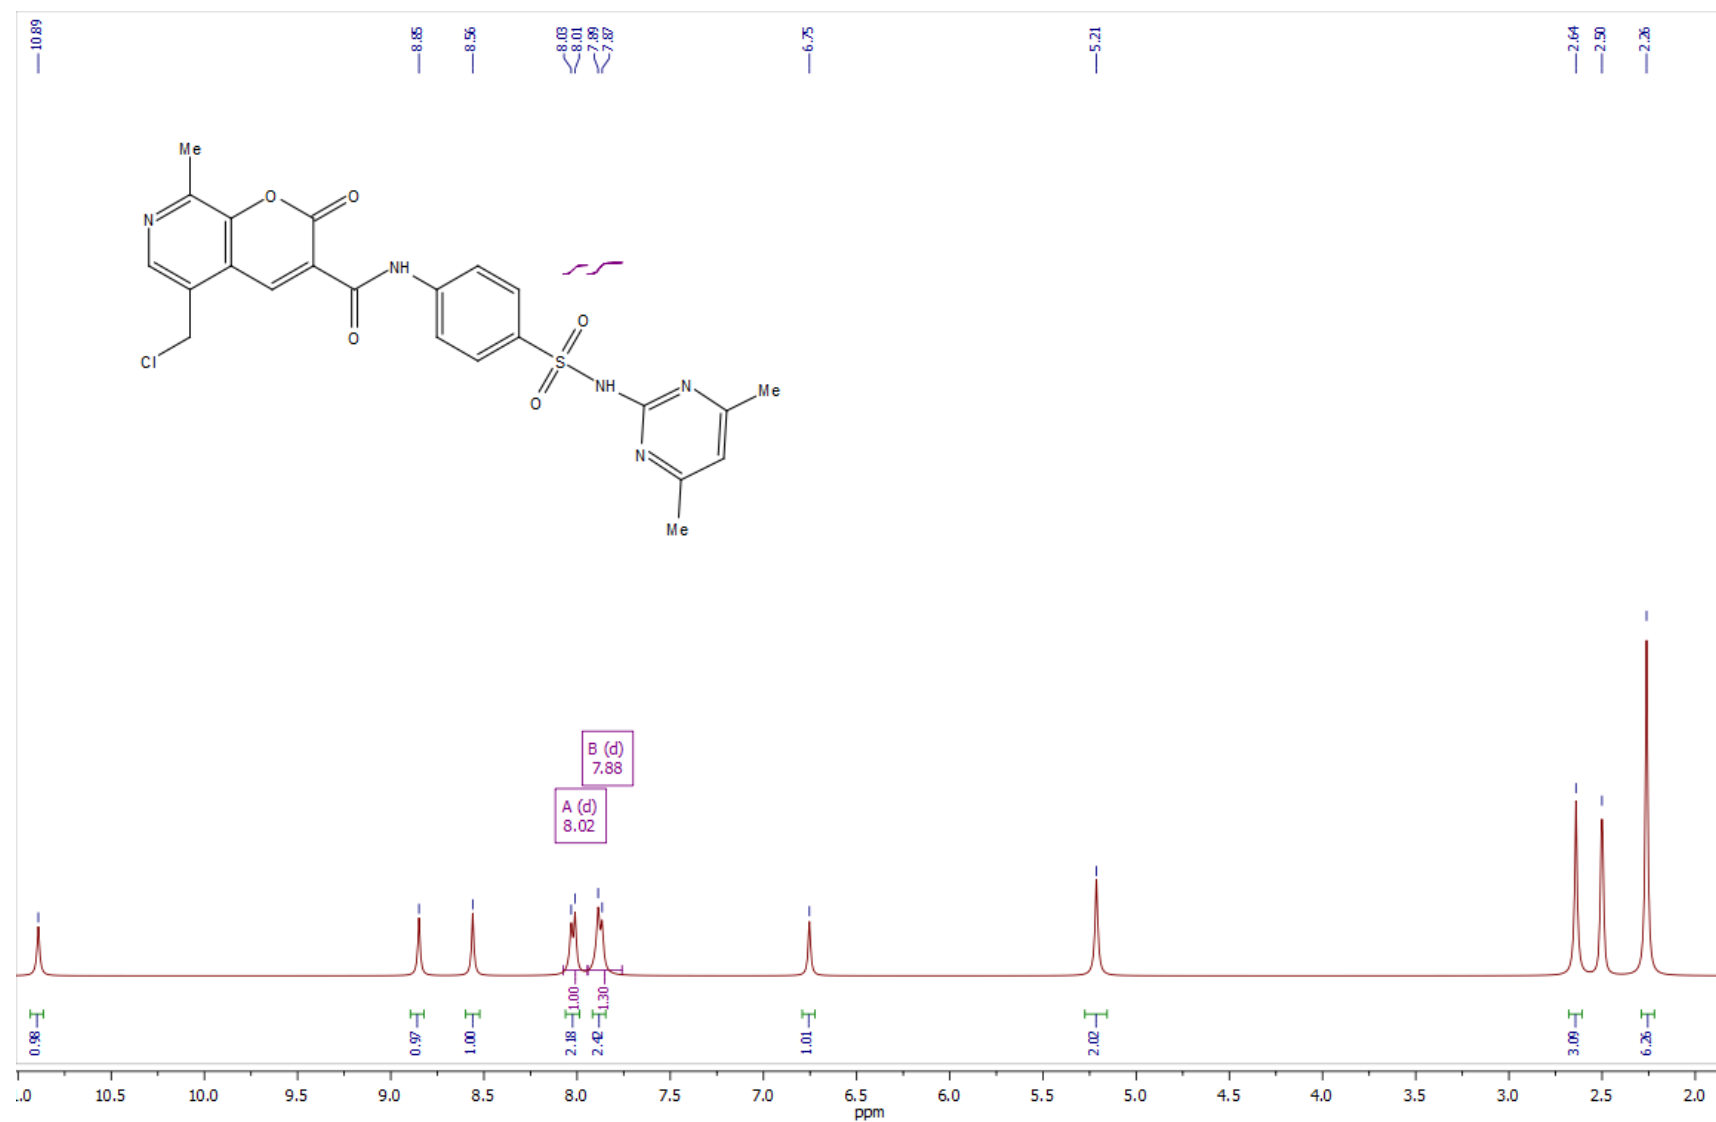

<sup>1</sup>H NMR (400 MHz, DMSO-*d*<sub>6</sub>) δ 8.02 (d, *J* = 8.5 Hz, 1H), 7.88 (d, *J* = 8.7 Hz, 1H).

Figure S40. <sup>1</sup>H NMR spectra of the compound **7I** (400 MHz, DMSO-*d*<sub>6</sub>)

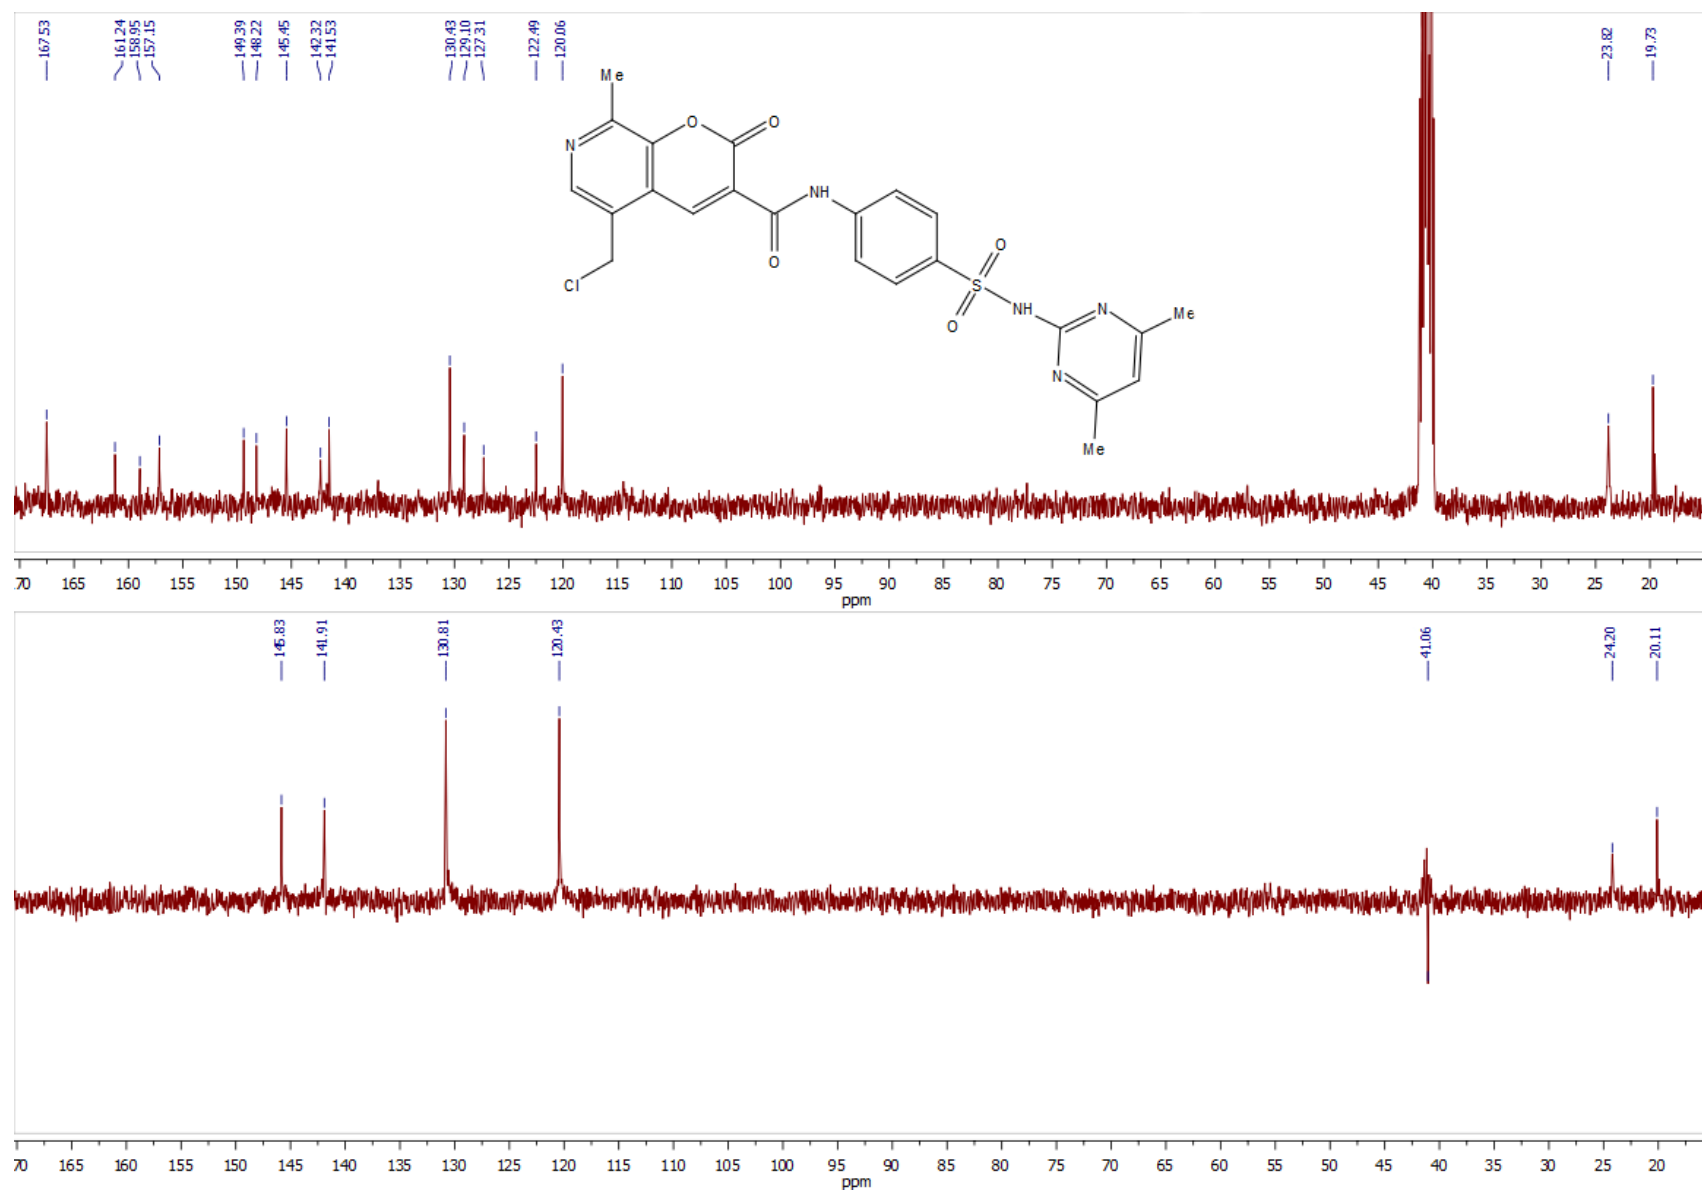

Figure S41.  $^{13}\text{C}$  NMR spectra of the compound **71** (400 MHz,  $\text{DMSO}-d_6$ )

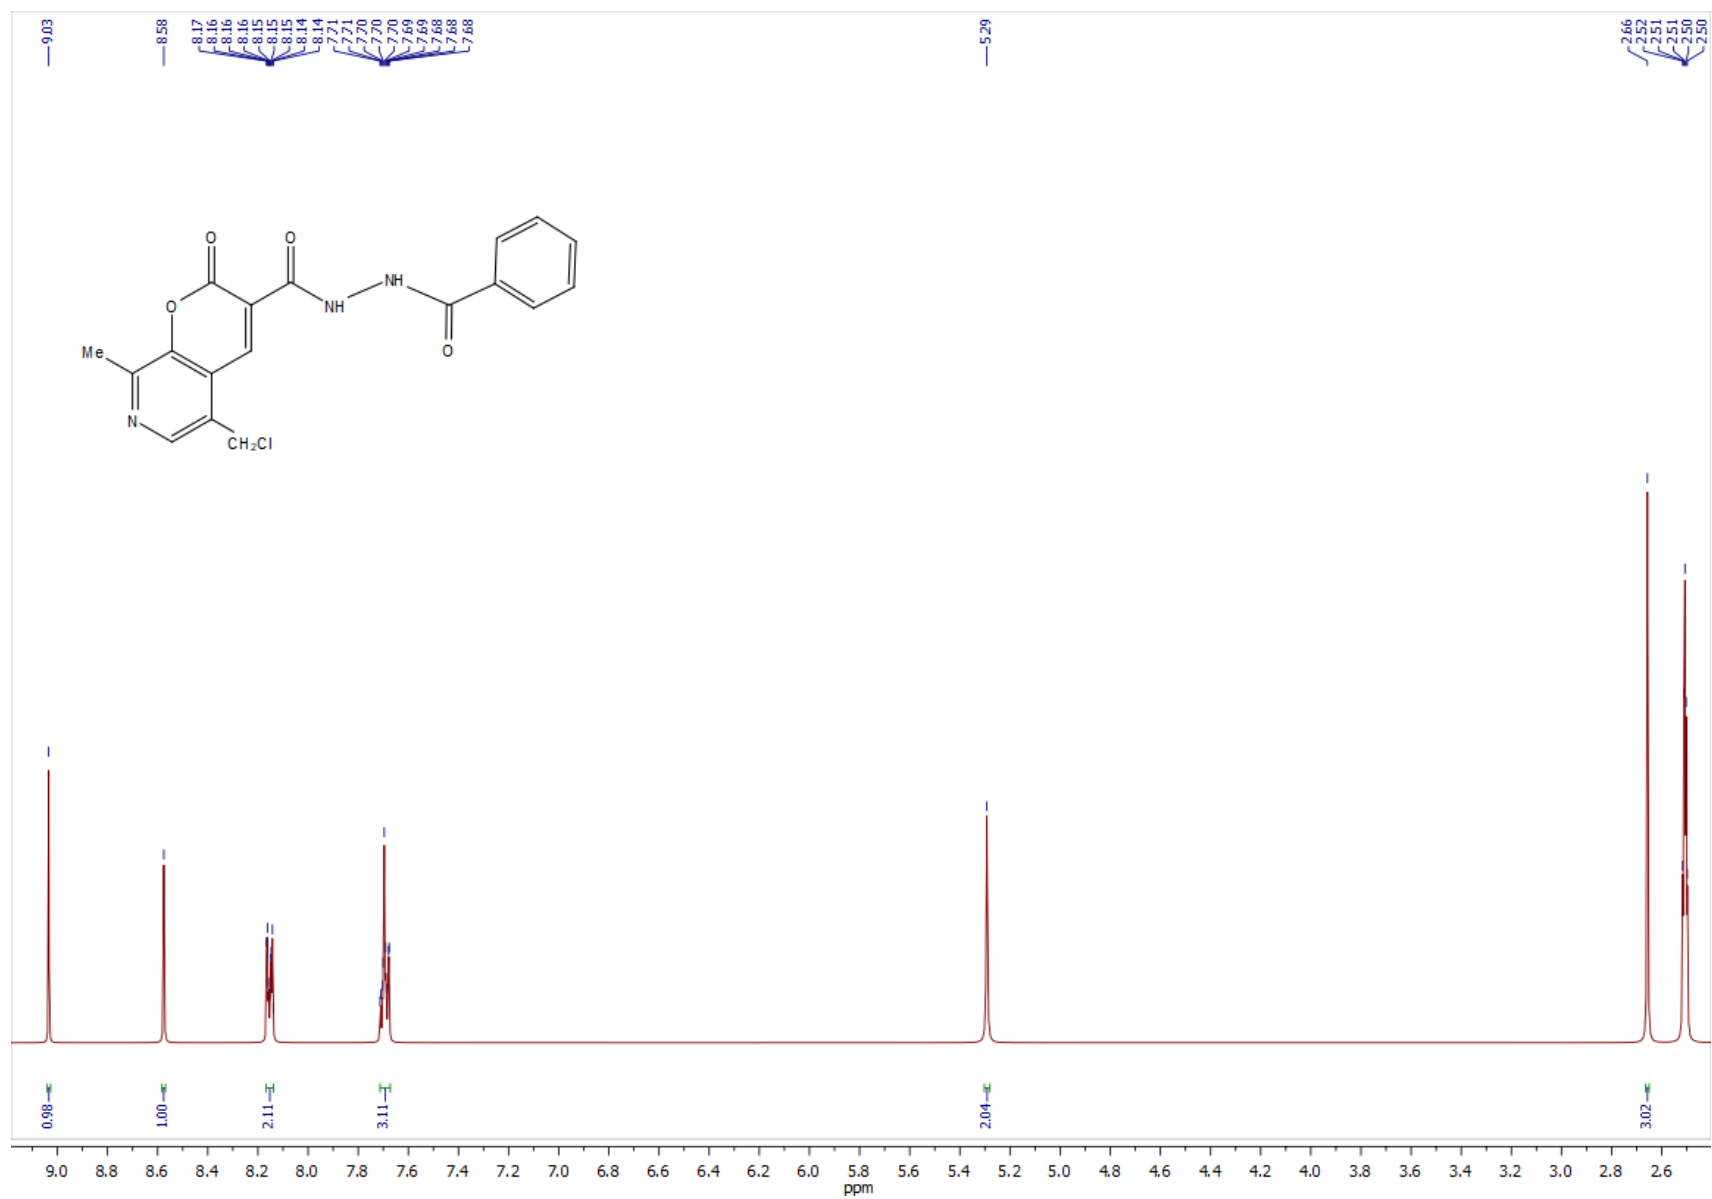

Figure S42. <sup>1</sup>H NMR spectra of the compound **7m** (400 MHz, DMSO-*d*<sub>6</sub>)

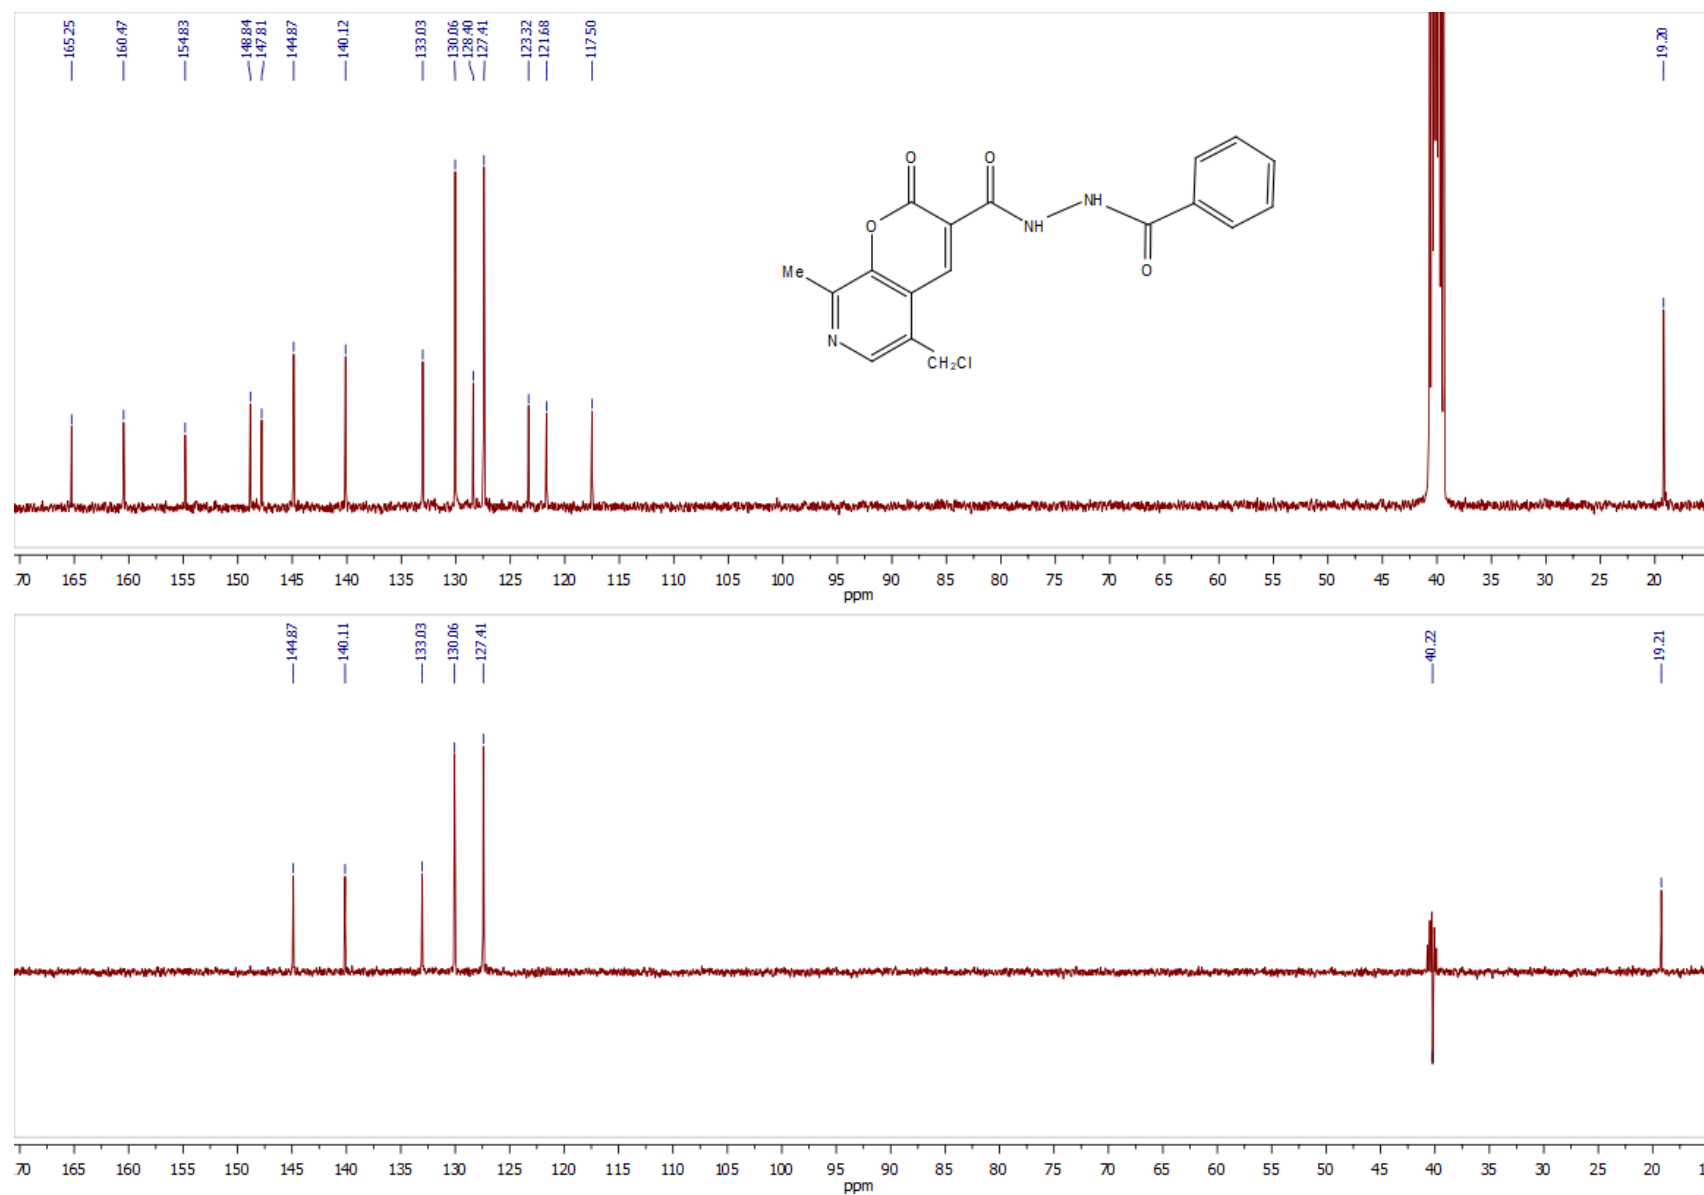

Figure S43.  $^{13}\text{C}$  NMR spectra of the compound **7m** (400 MHz,  $\text{DMSO}-d_6$ )

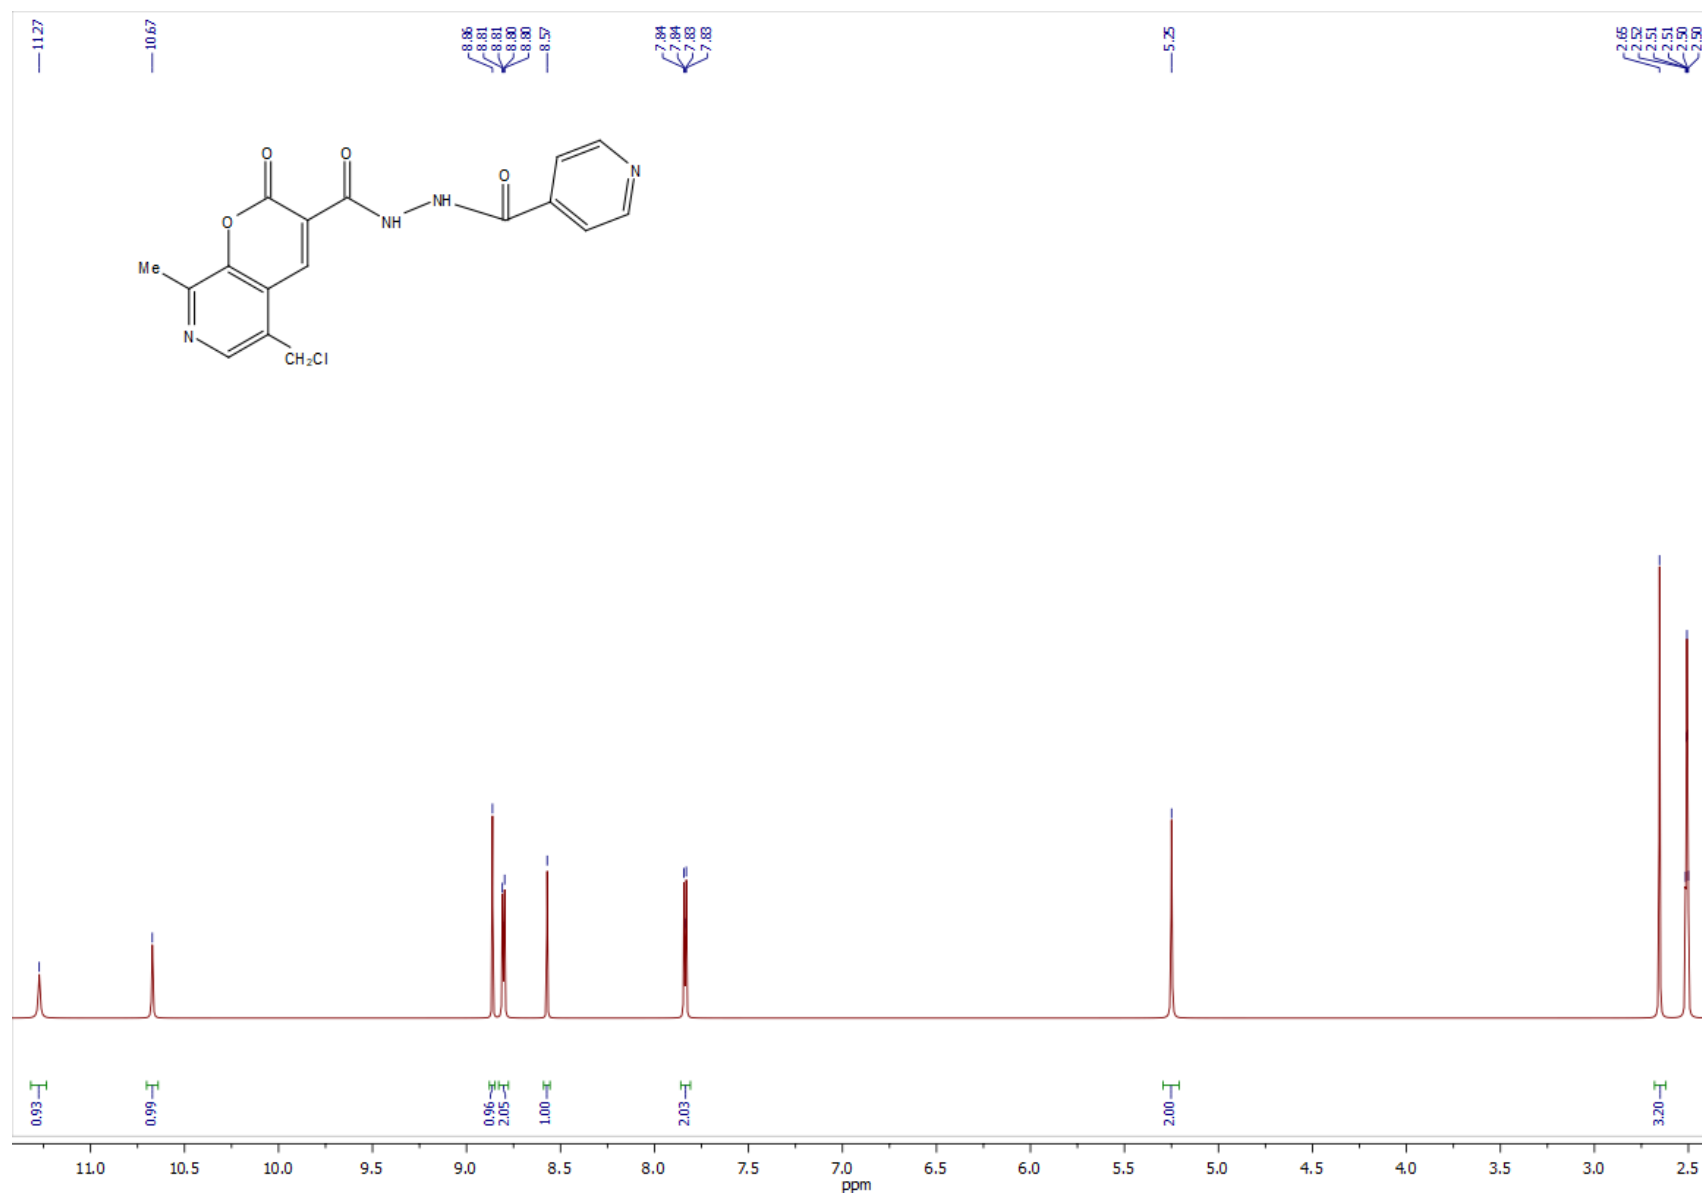

Figure S44. <sup>1</sup>H NMR spectra of the compound **7n** (400 MHz, DMSO-*d*<sub>6</sub>)

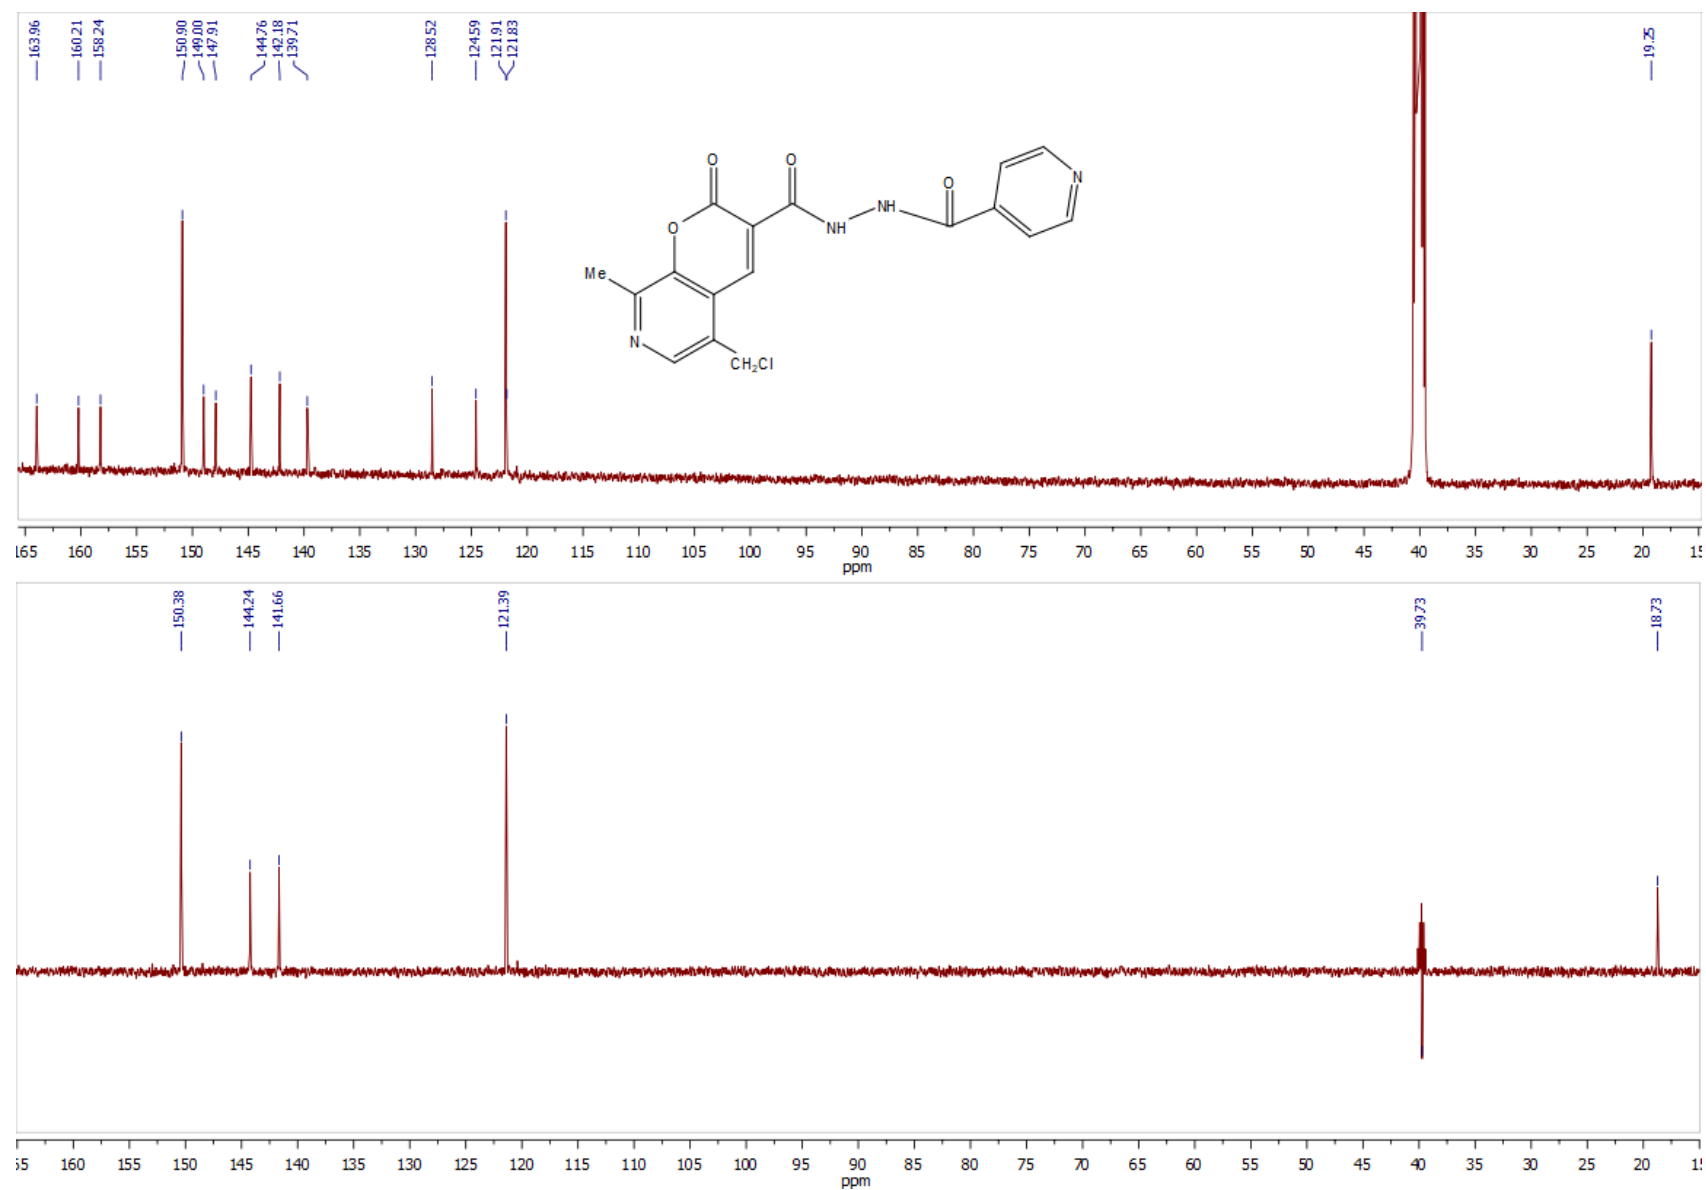

Figure S45.  $^{13}\text{C}$  NMR spectra of the compound **7n** (400 MHz,  $\text{DMSO}-d_6$ )

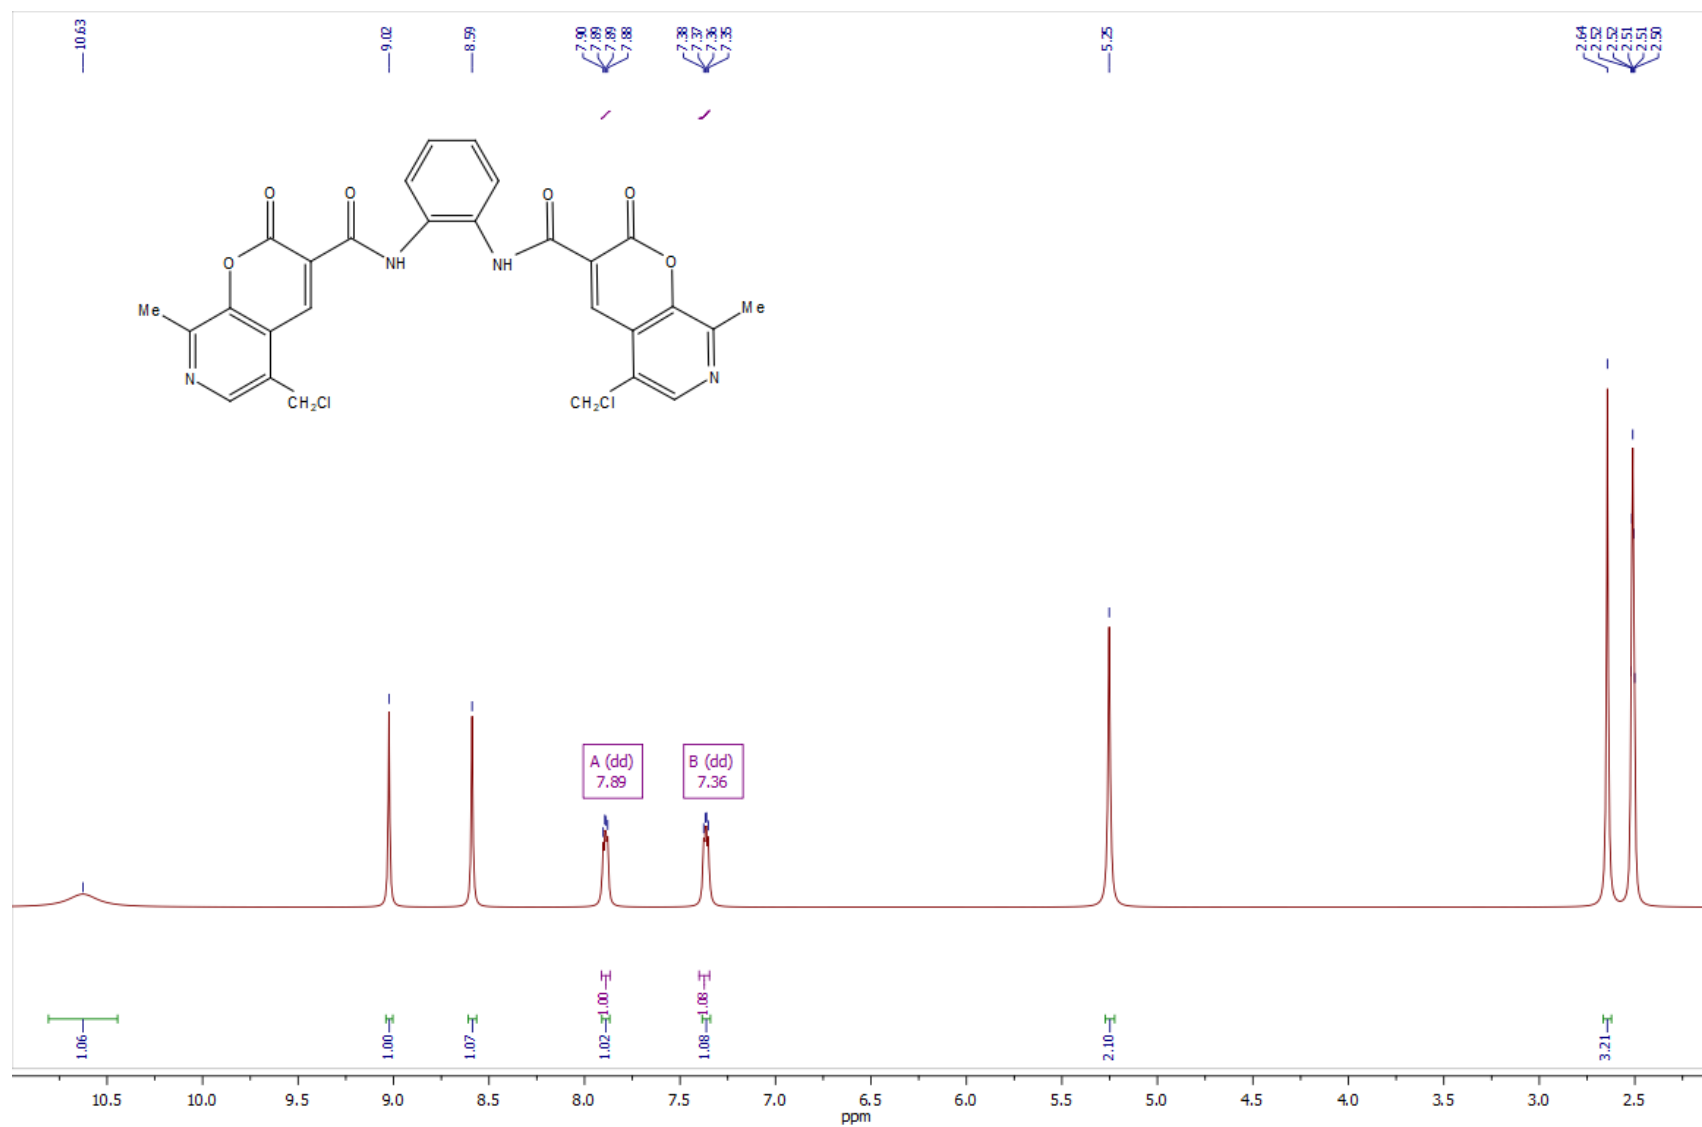

<sup>1</sup>H NMR (400 MHz, DMSO-*d*<sub>6</sub>) δ 7.89 (dd, *J* = 6.0, 3.5 Hz, 1H), 7.36 (dd, *J* = 6.1, 3.5 Hz, 1H).

Figure S46. <sup>1</sup>H NMR spectra of the compound **7o** (400 MHz, DMSO-*d*<sub>6</sub>)

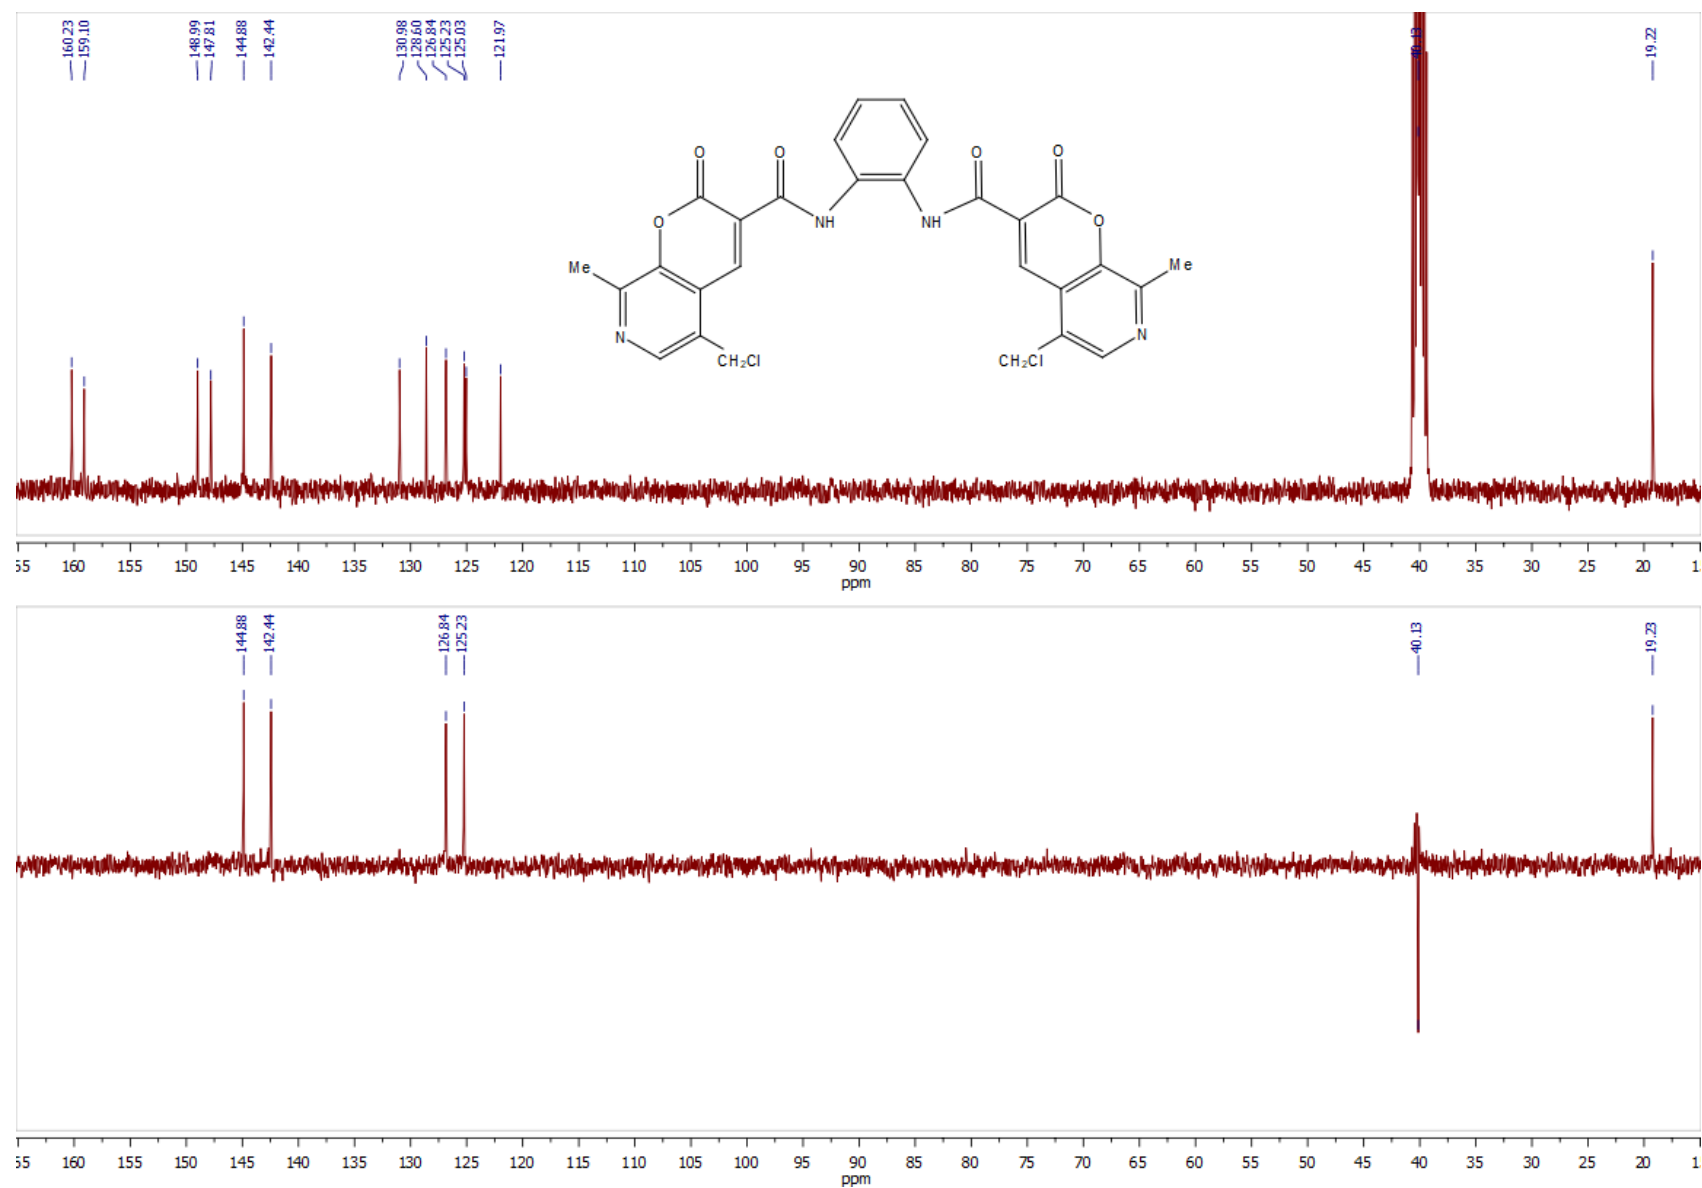

Figure S47.  $^{13}\text{C}$  NMR spectra of the compound **7a** (400 MHz,  $\text{DMSO}-d_6$ )



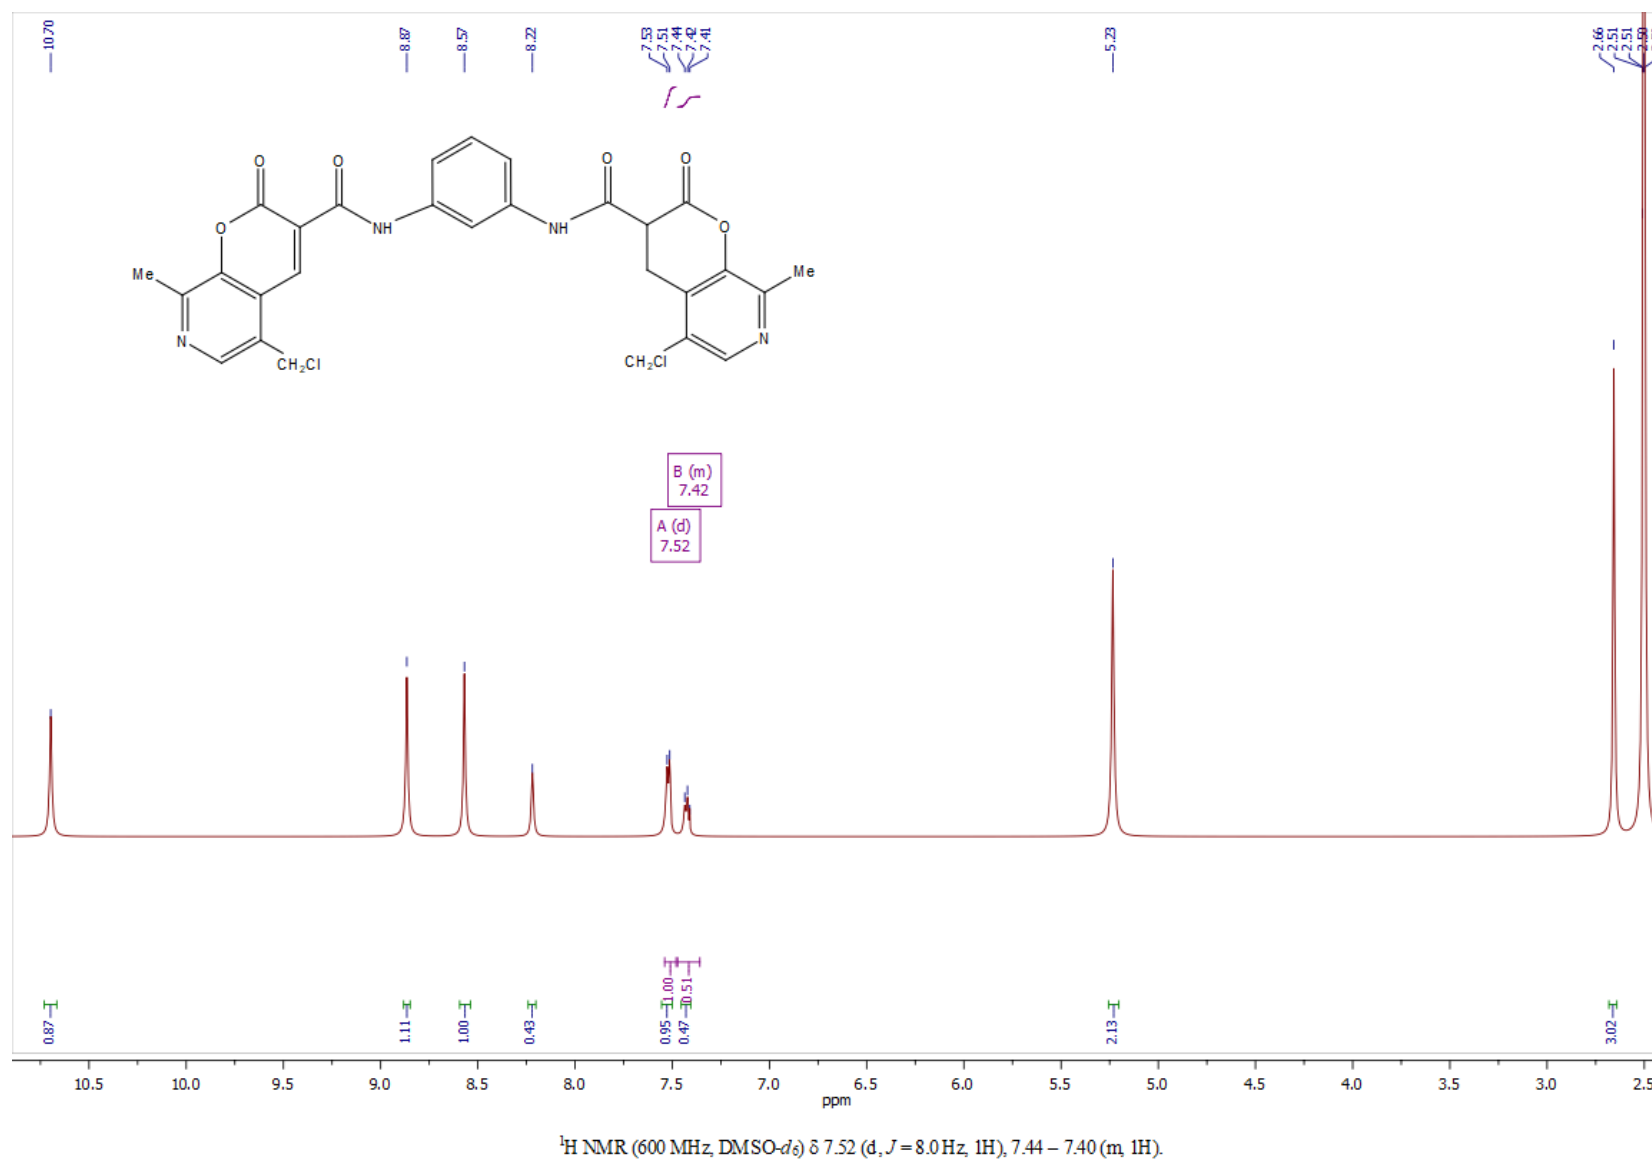

Figure S48. <sup>1</sup>H NMR spectra of the compound **7p** (600 MHz, DMSO-*d*<sub>6</sub>)

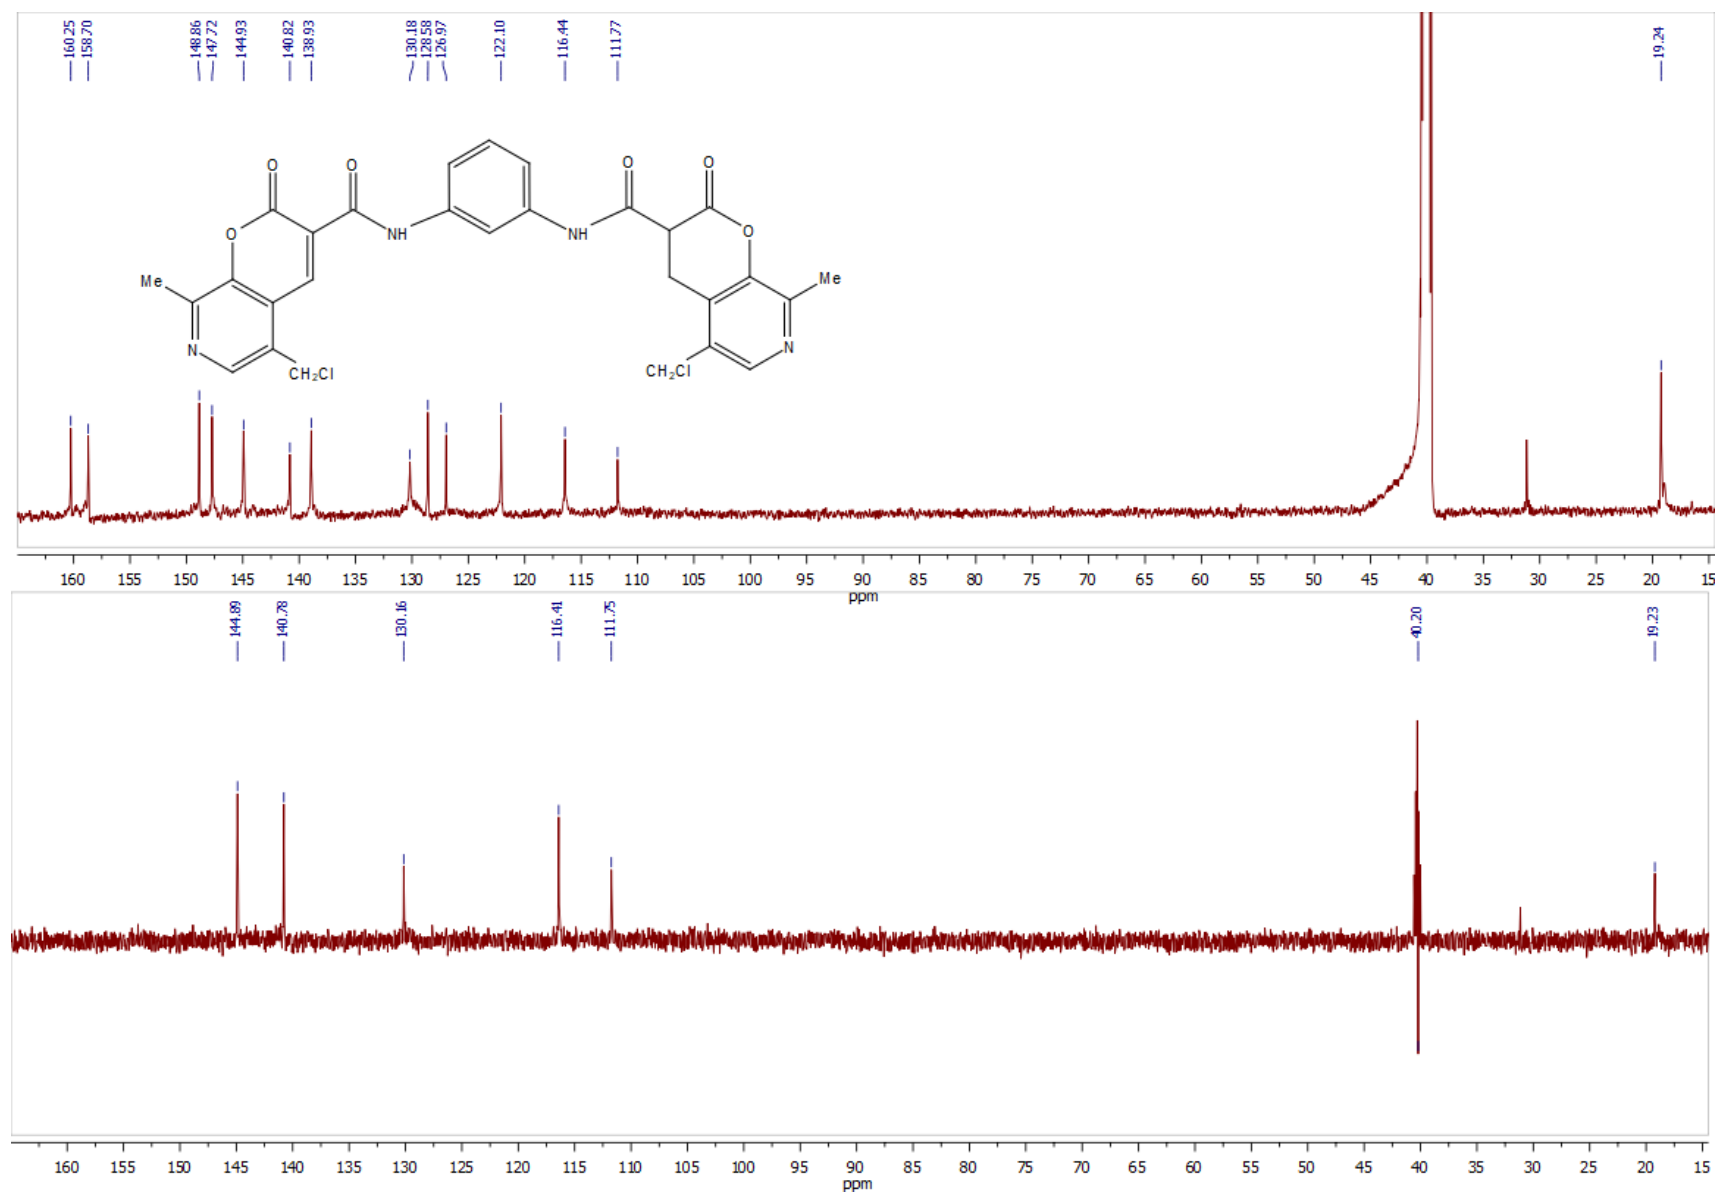

Figure S49.  $^{13}\text{C}$  NMR spectra of the compound **7p** (600 MHz,  $\text{DMSO}-d_6$ )

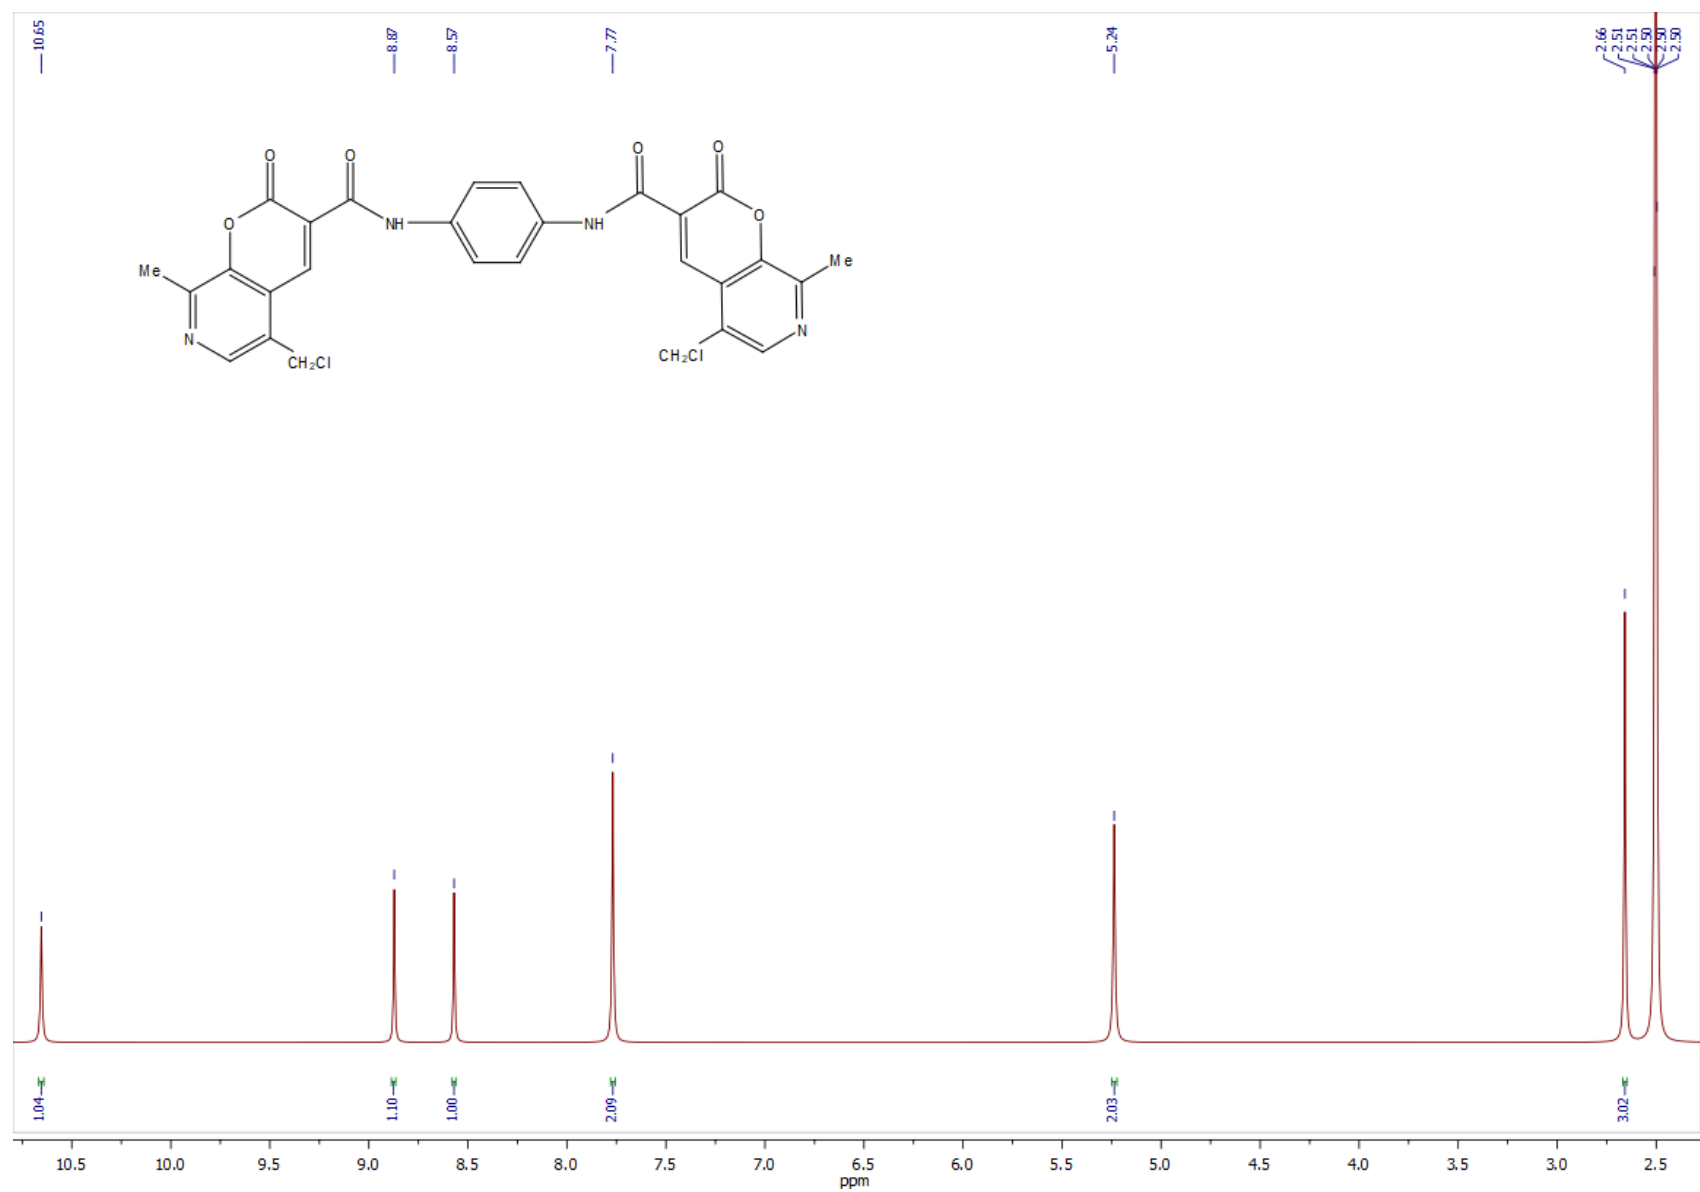

Figure S50.  $^1\text{H}$  NMR spectra of the compound **7q** (600 MHz,  $\text{DMSO}-d_6$ )

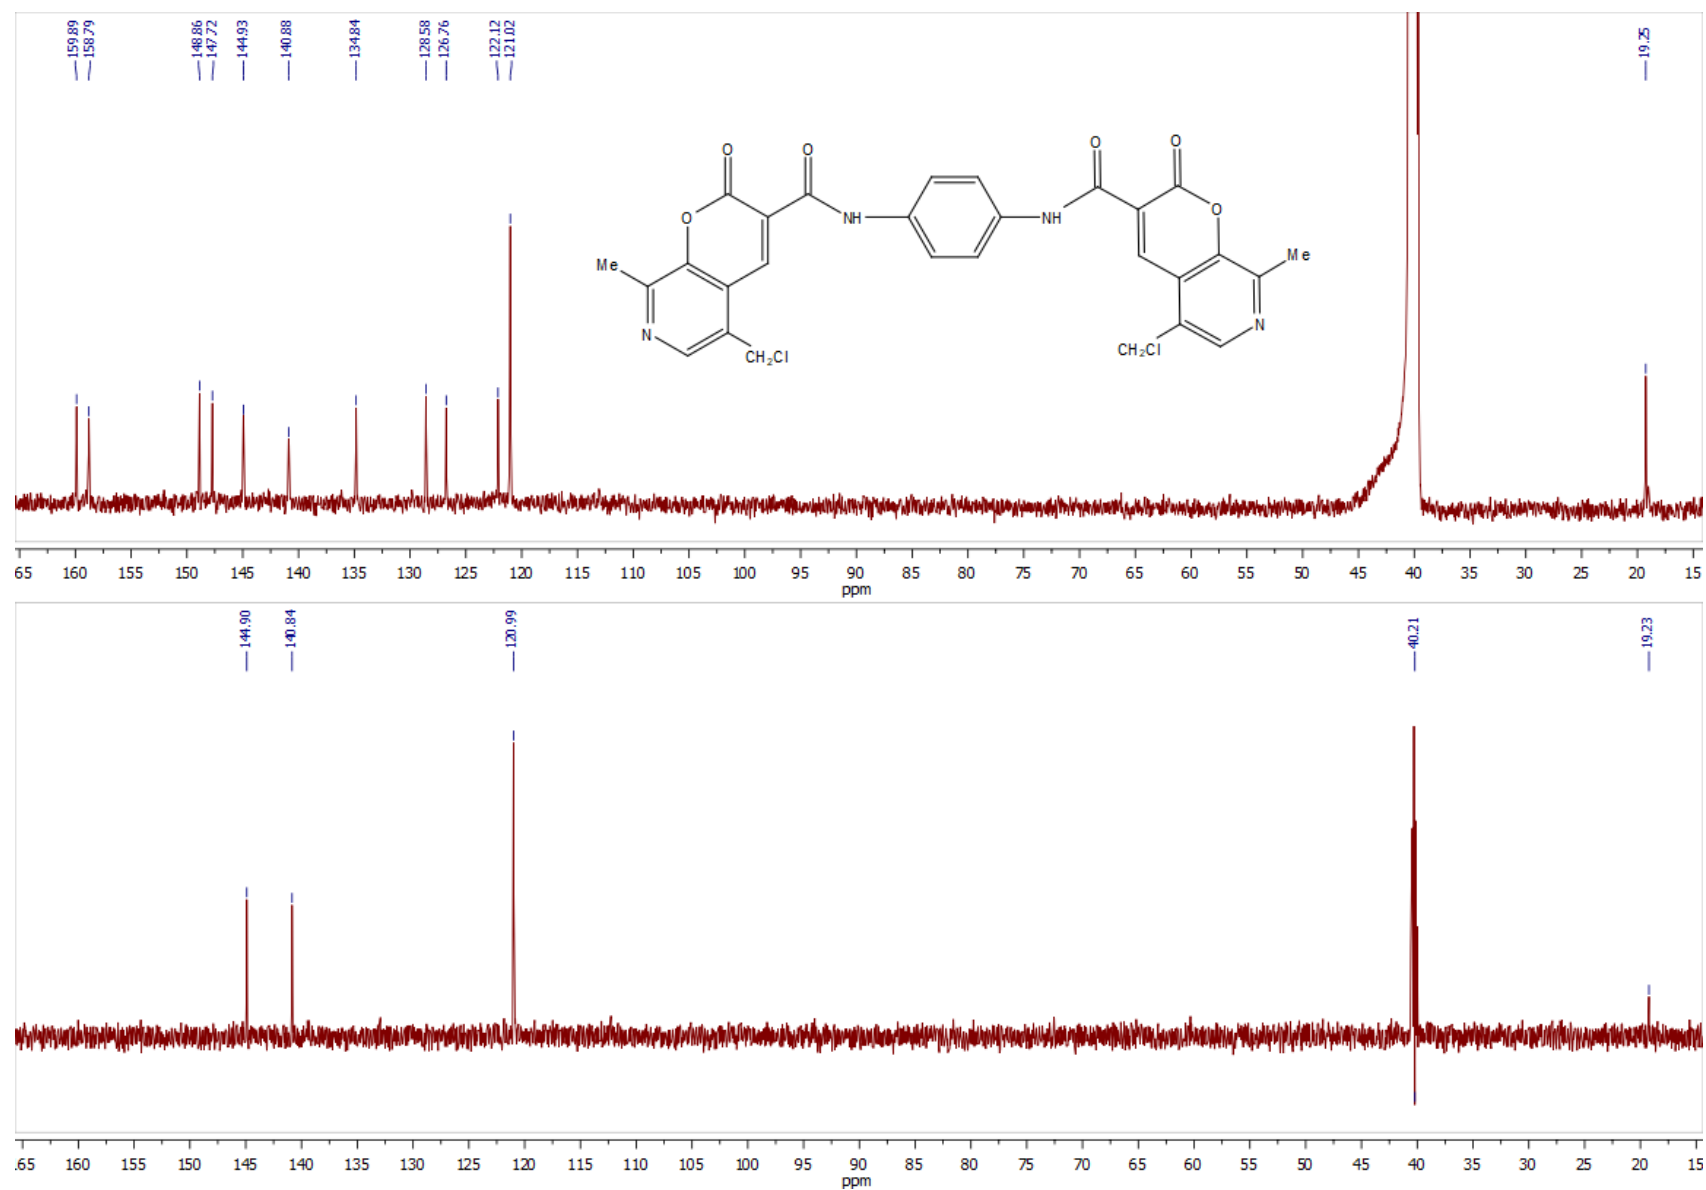

Figure S51.  $^{13}\text{C}$  NMR spectra of the compound **7q** (600 MHz,  $\text{DMSO}-d_6$ )

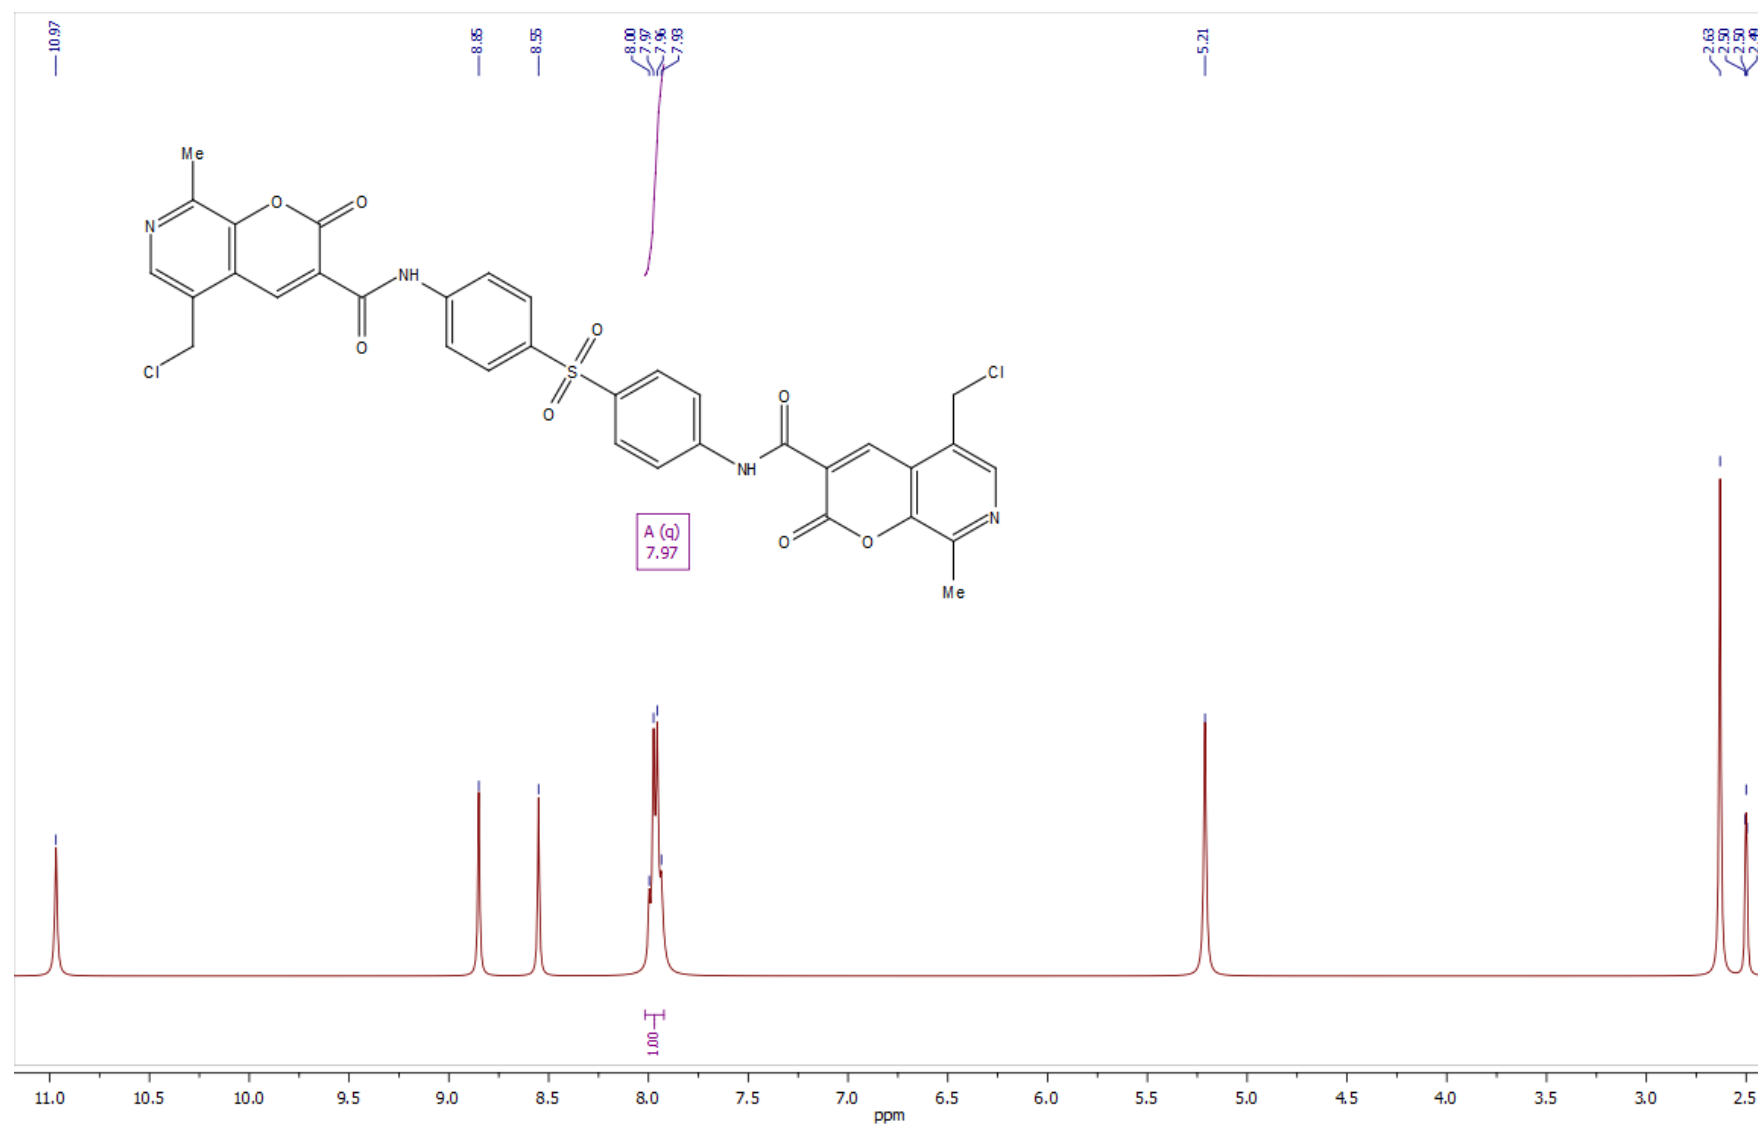

$^1\text{H}$  NMR (400 MHz,  $\text{DMSO}-d_6$ )  $\delta$  7.97 (q,  $J = 8.7$  Hz, 1H).

Figure S52.  $^1\text{H}$  NMR spectra of the compound **7r** (400 MHz,  $\text{DMSO}-d_6$ )

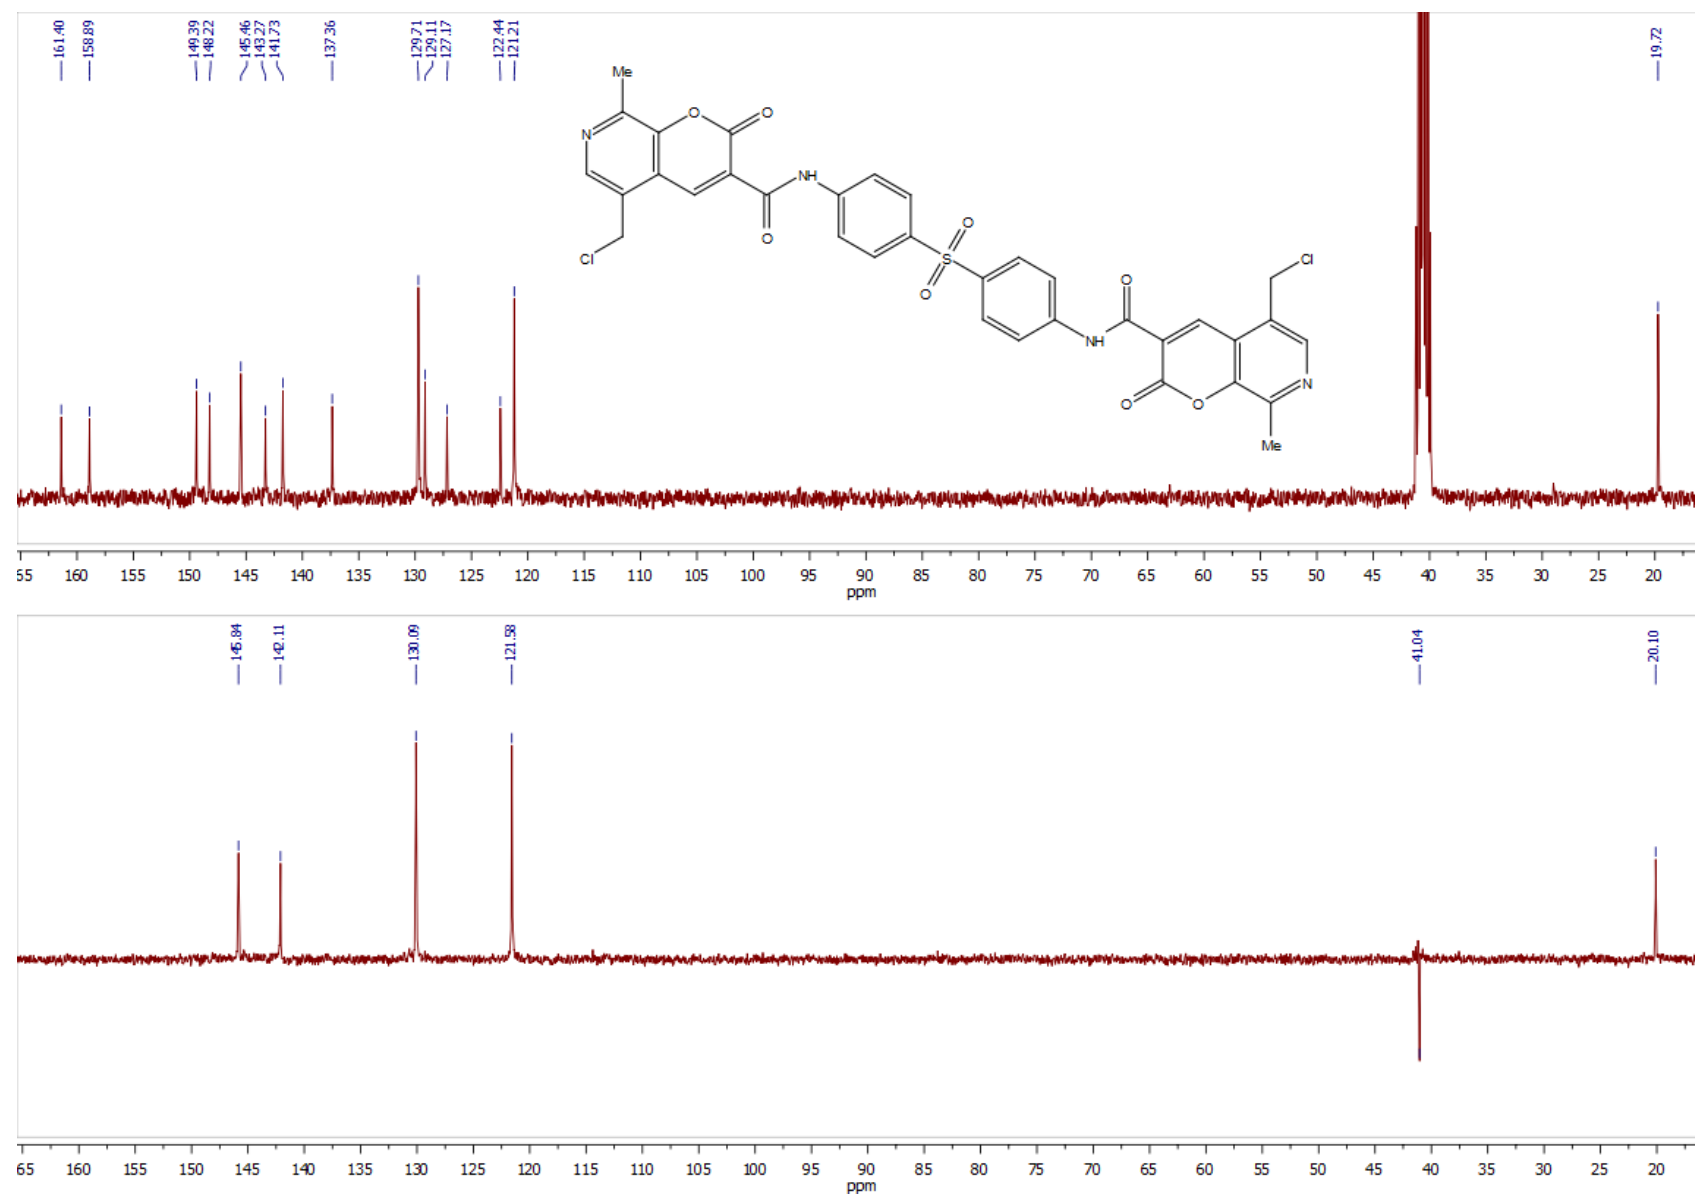

Figure S53.  $^{13}\text{C}$  NMR spectra of the compound **7r** (400 MHz,  $\text{DMSO}-d_6$ )

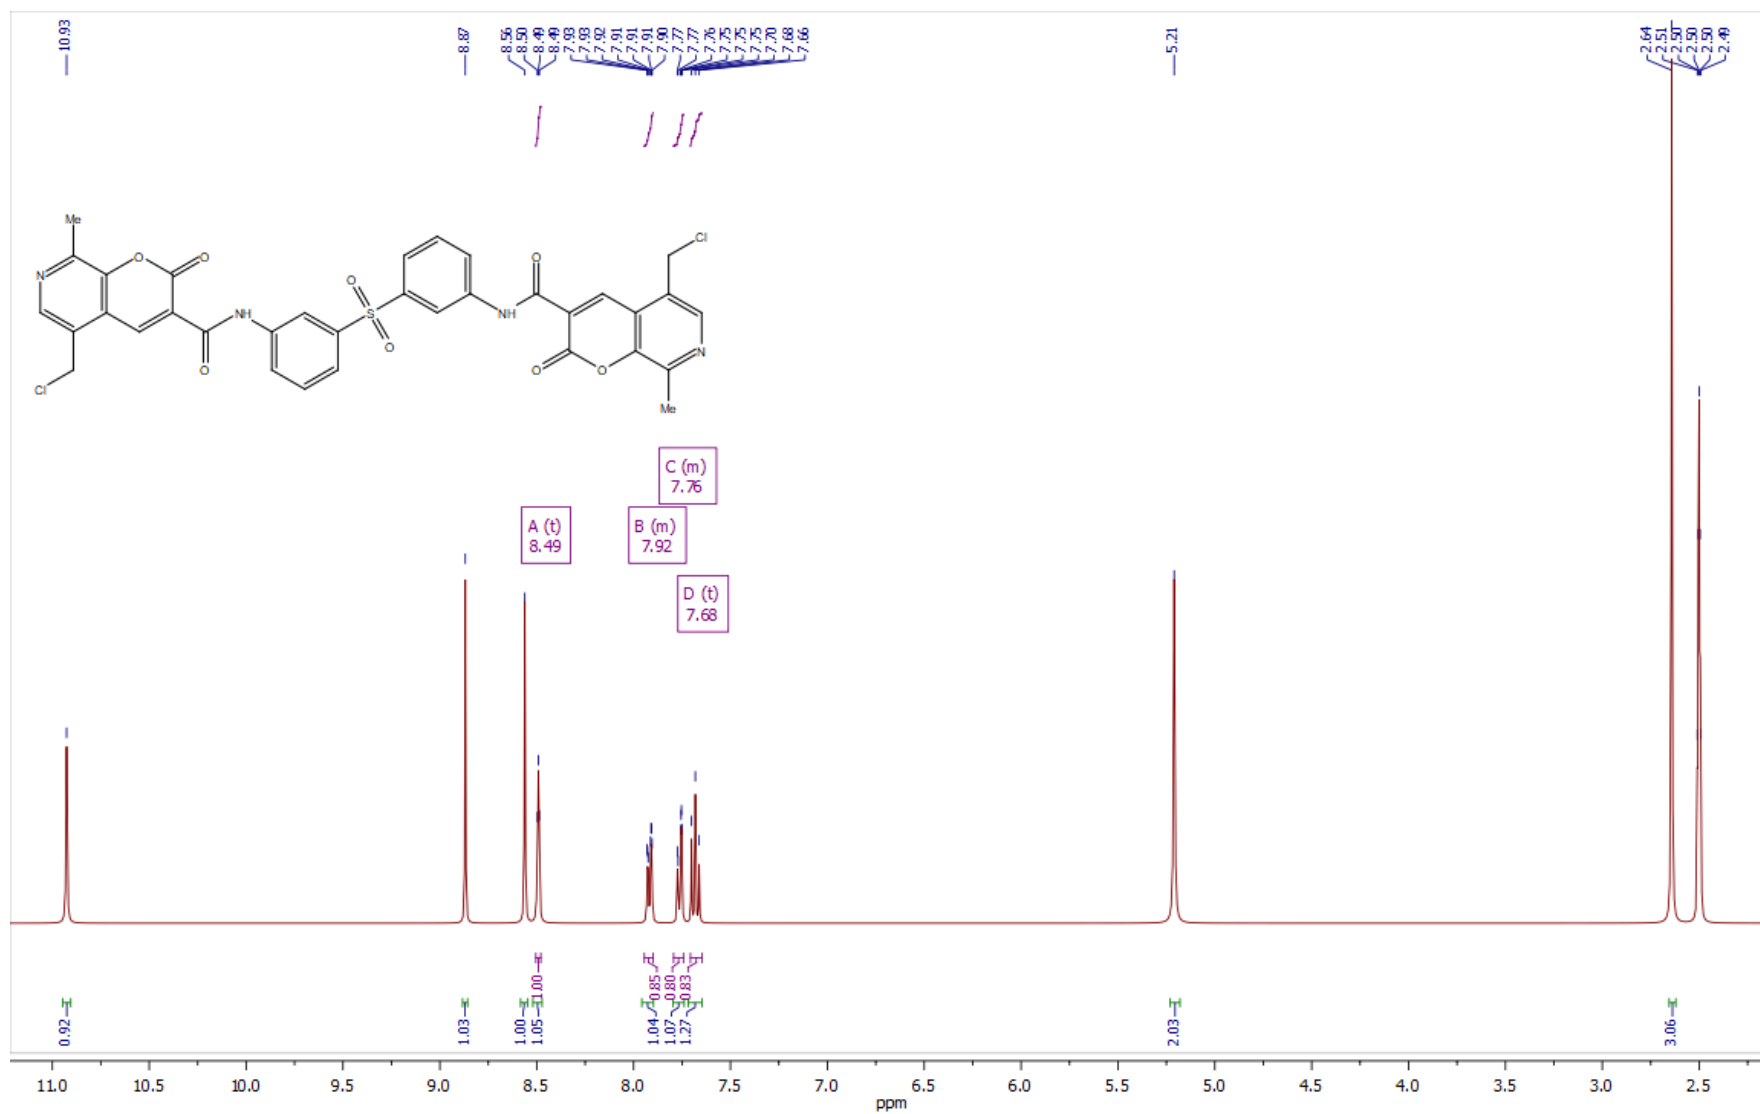

<sup>1</sup>H NMR (400 MHz, DMSO-*d*<sub>6</sub>)  $\delta$  8.49 (t,  $J = 2.0$  Hz, 1H), 7.94 – 7.90 (m, 1H), 7.79 – 7.74 (m, 1H), 7.68 (t,  $J = 7.9$  Hz, 1H).

Figure S54. <sup>1</sup>H NMR spectra of the compound **7s** (400 MHz, DMSO-*d*<sub>6</sub>)

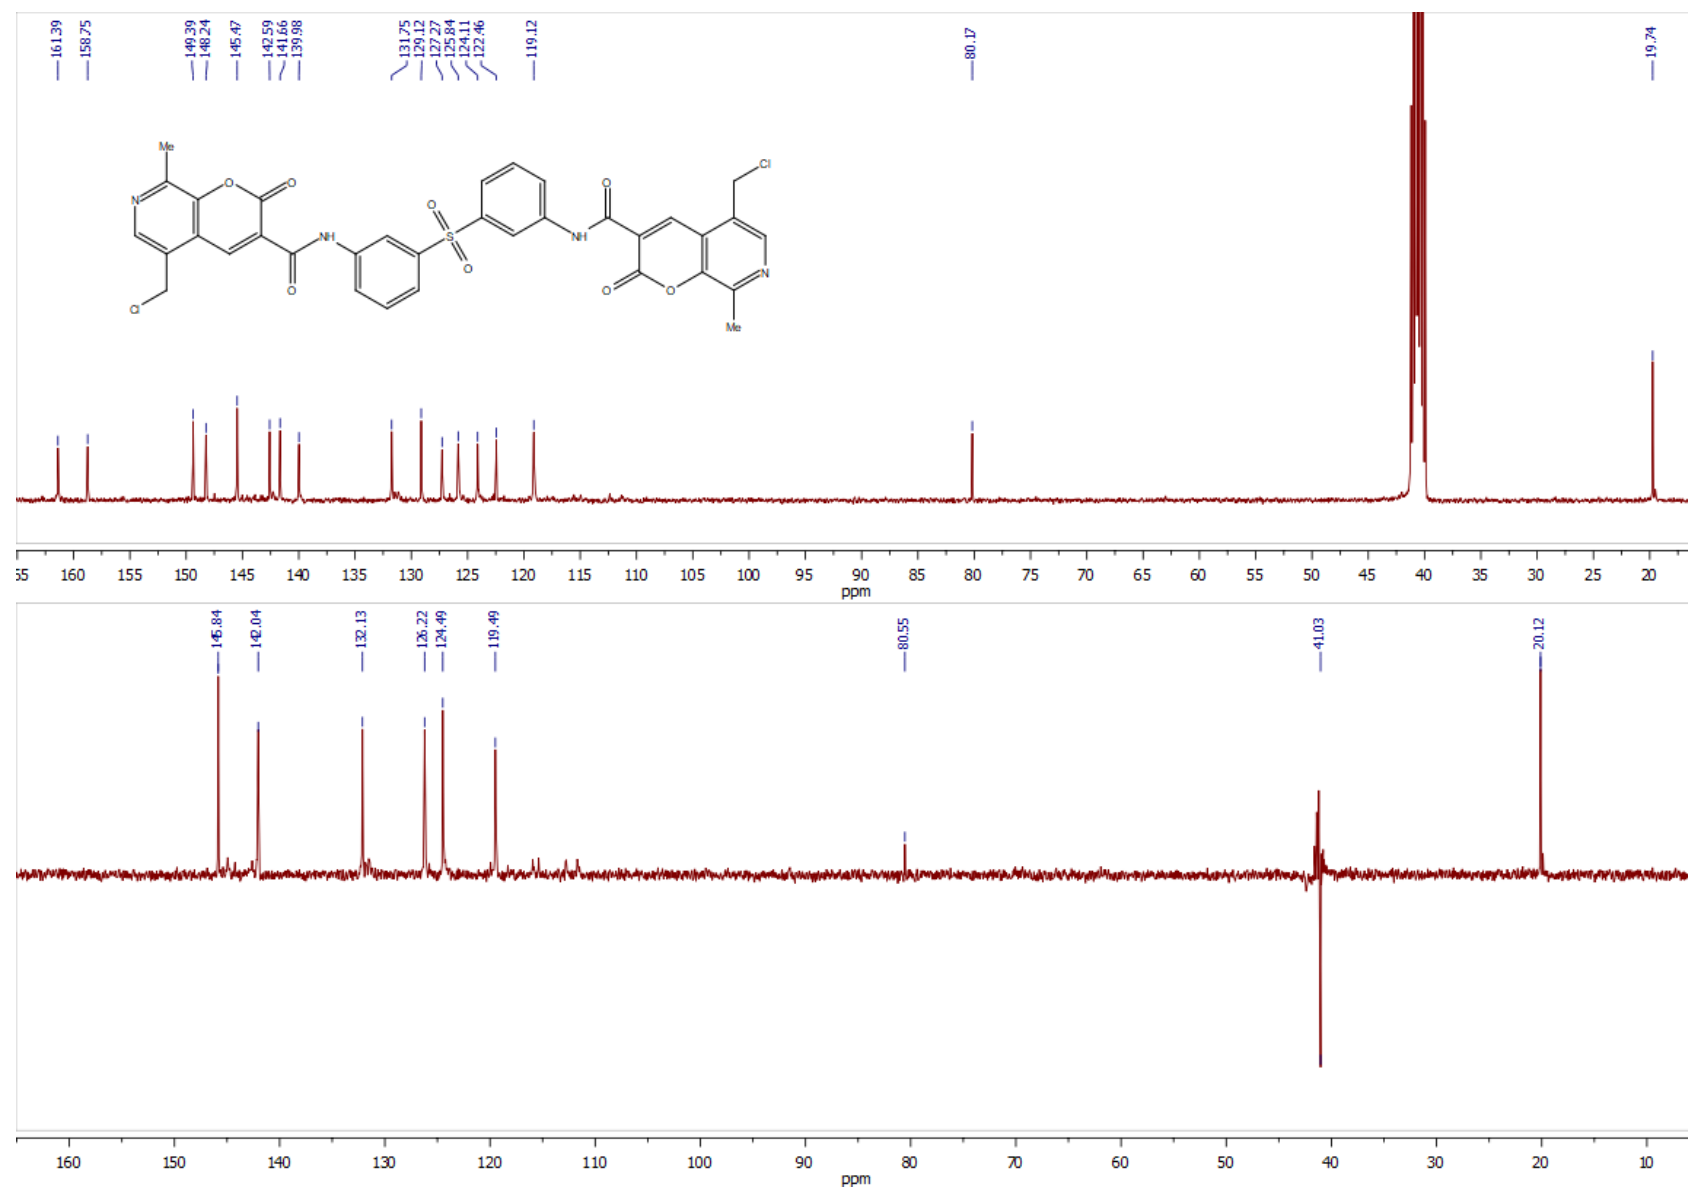

Figure S55. <sup>13</sup>C NMR spectra of the compound **7s** (400 MHz, DMSO-*d*<sub>6</sub>)



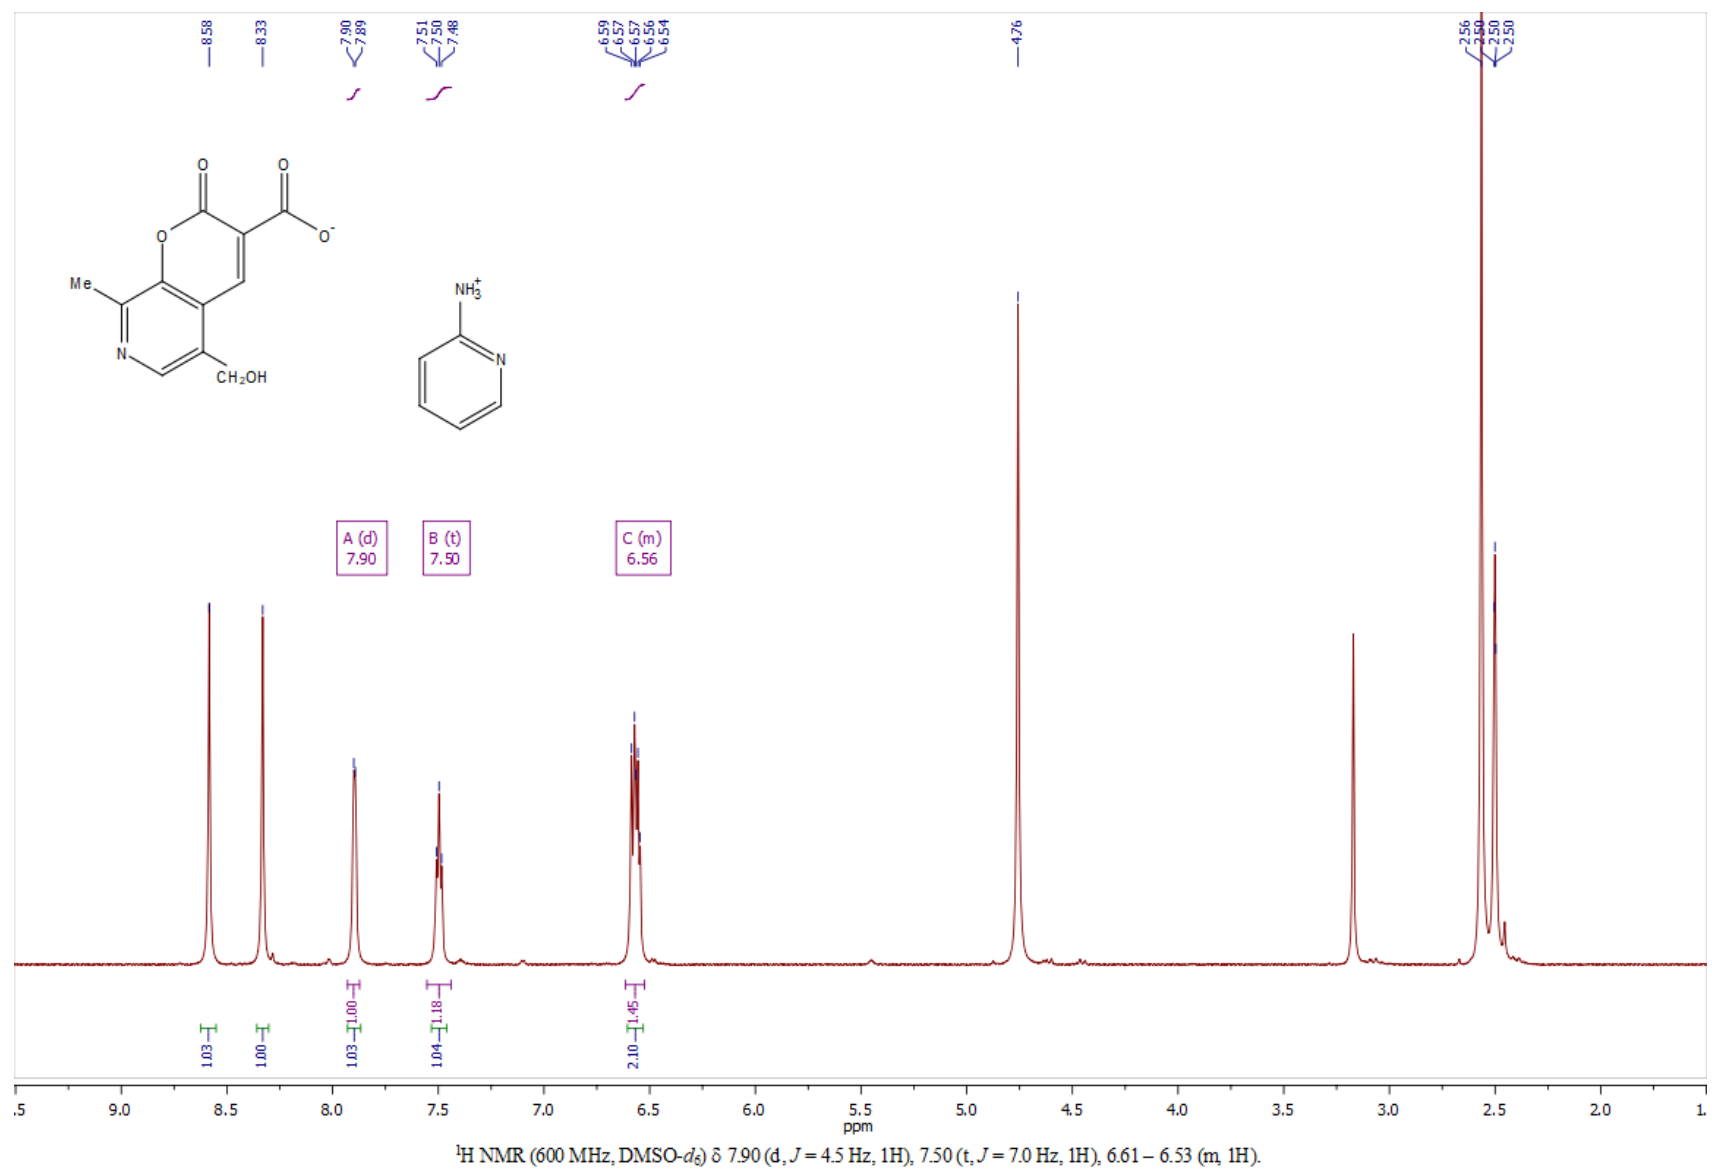

Figure S56.  $^1\text{H}$  NMR spectra of the compound **8a** (600 MHz,  $\text{DMSO}-d_6$ )

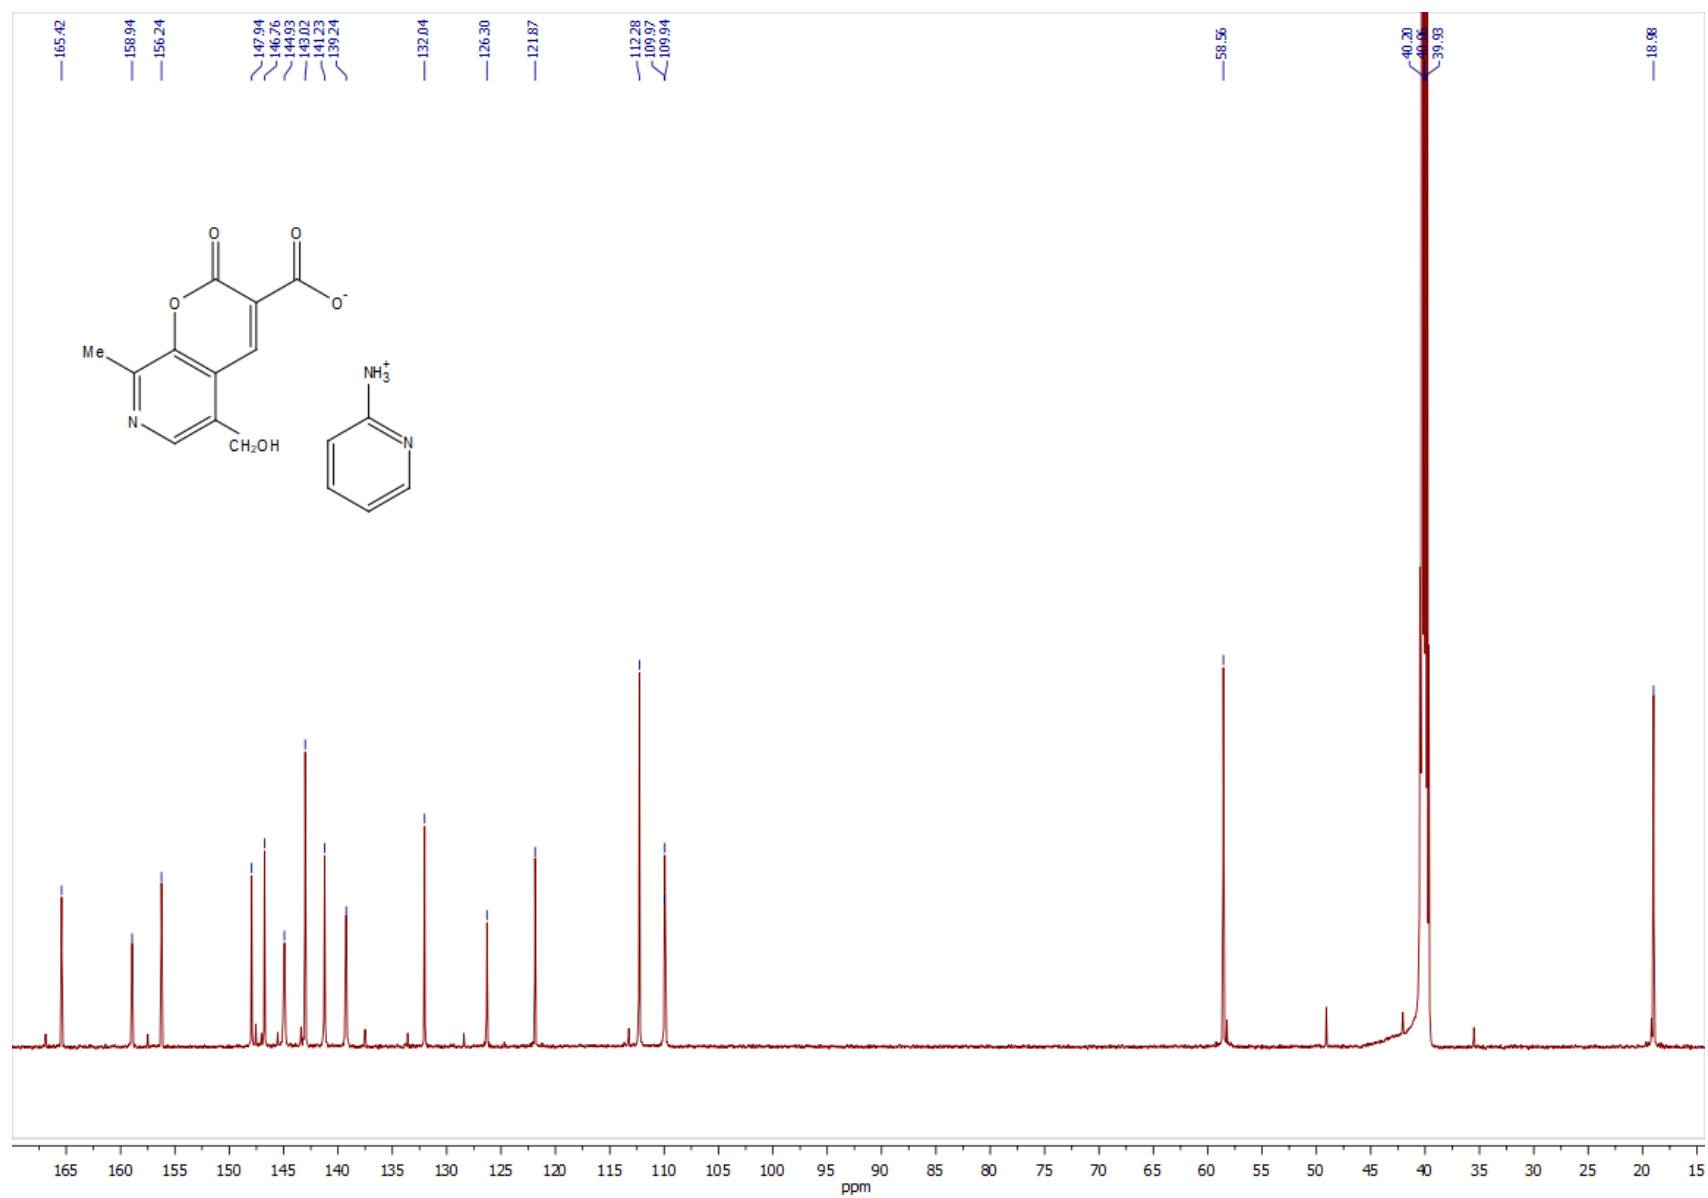

Figure S57. <sup>13</sup>C NMR spectra of the compound **8a** (600 MHz, DMSO-*d*<sub>6</sub>)

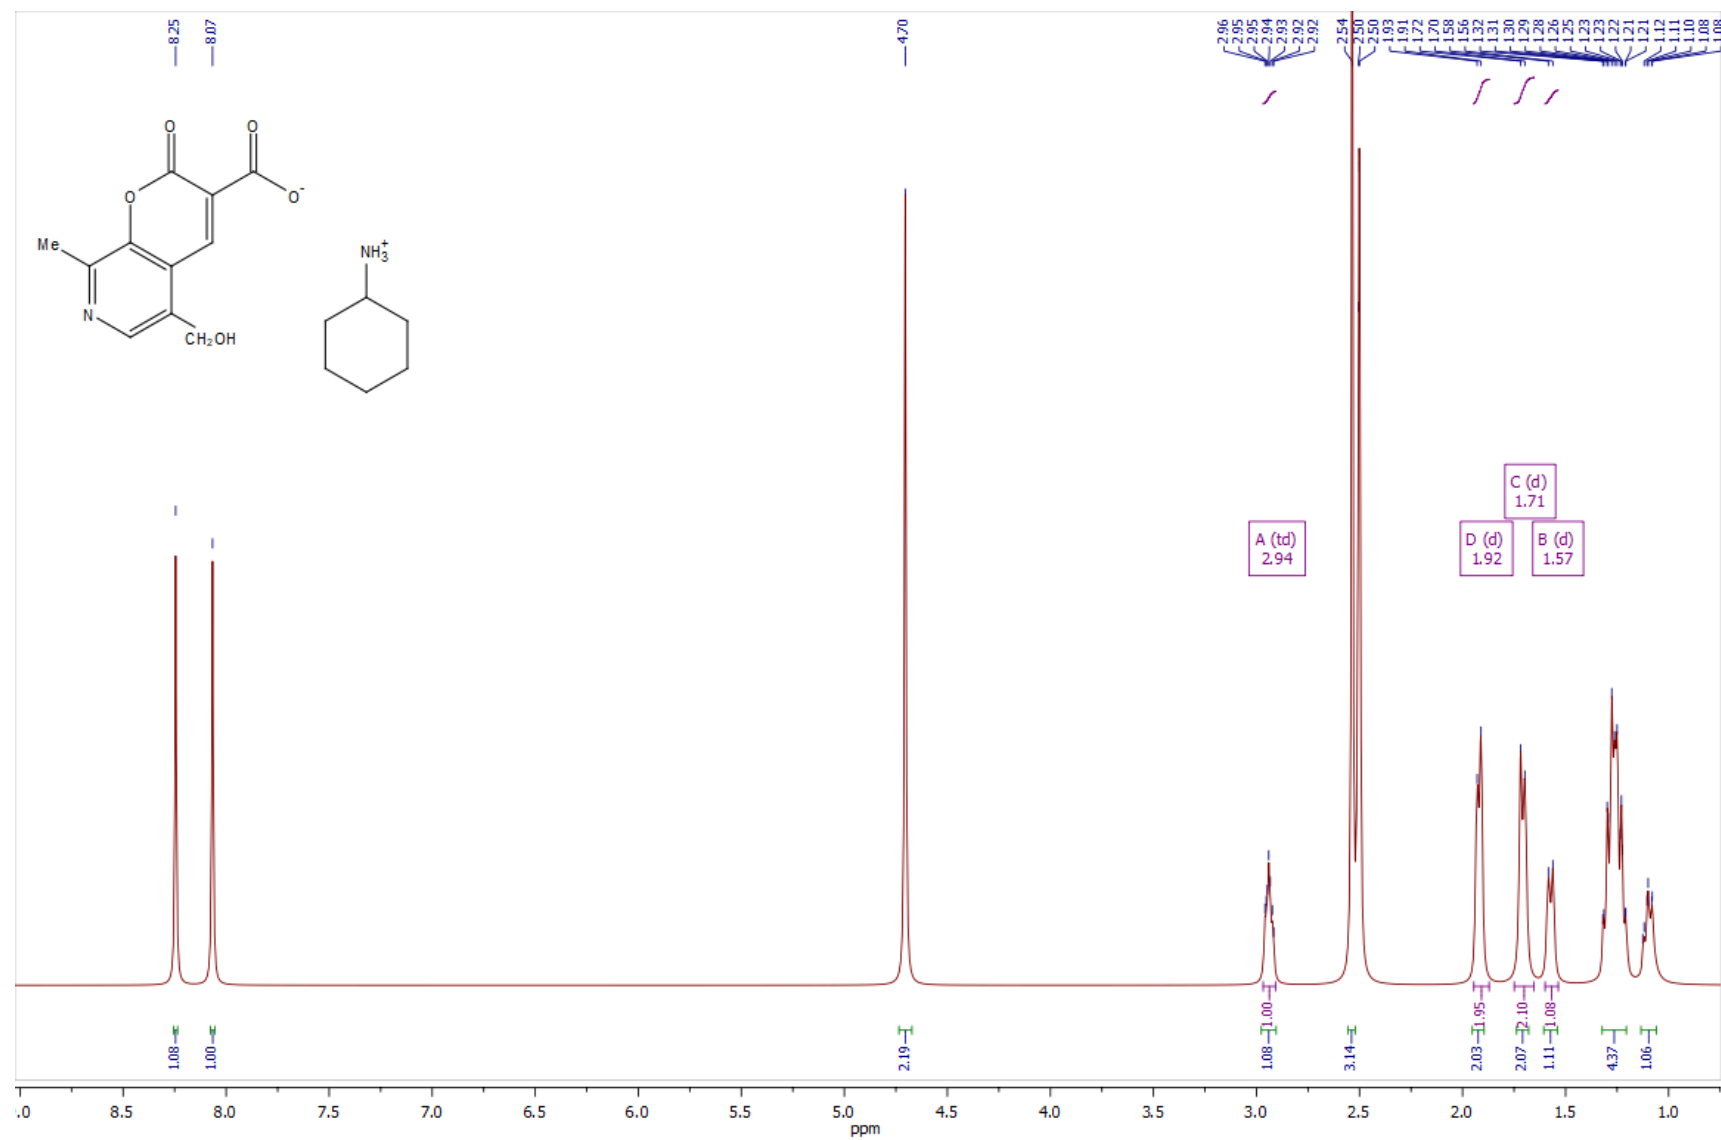

<sup>1</sup>H NMR (600 MHz, DMSO-*d*<sub>6</sub>) δ 2.94 (td, *J* = 10.5, 10.0, 5.4 Hz, 1H), 1.92 (d, *J* = 11.2 Hz, 2H), 1.71 (d, *J* = 12.2 Hz, 2H), 1.57 (d, *J* = 13.0 Hz, 1H).

Figure S58. <sup>1</sup>H NMR spectra of the compound **8b** (600 MHz, DMSO-*d*<sub>6</sub>)

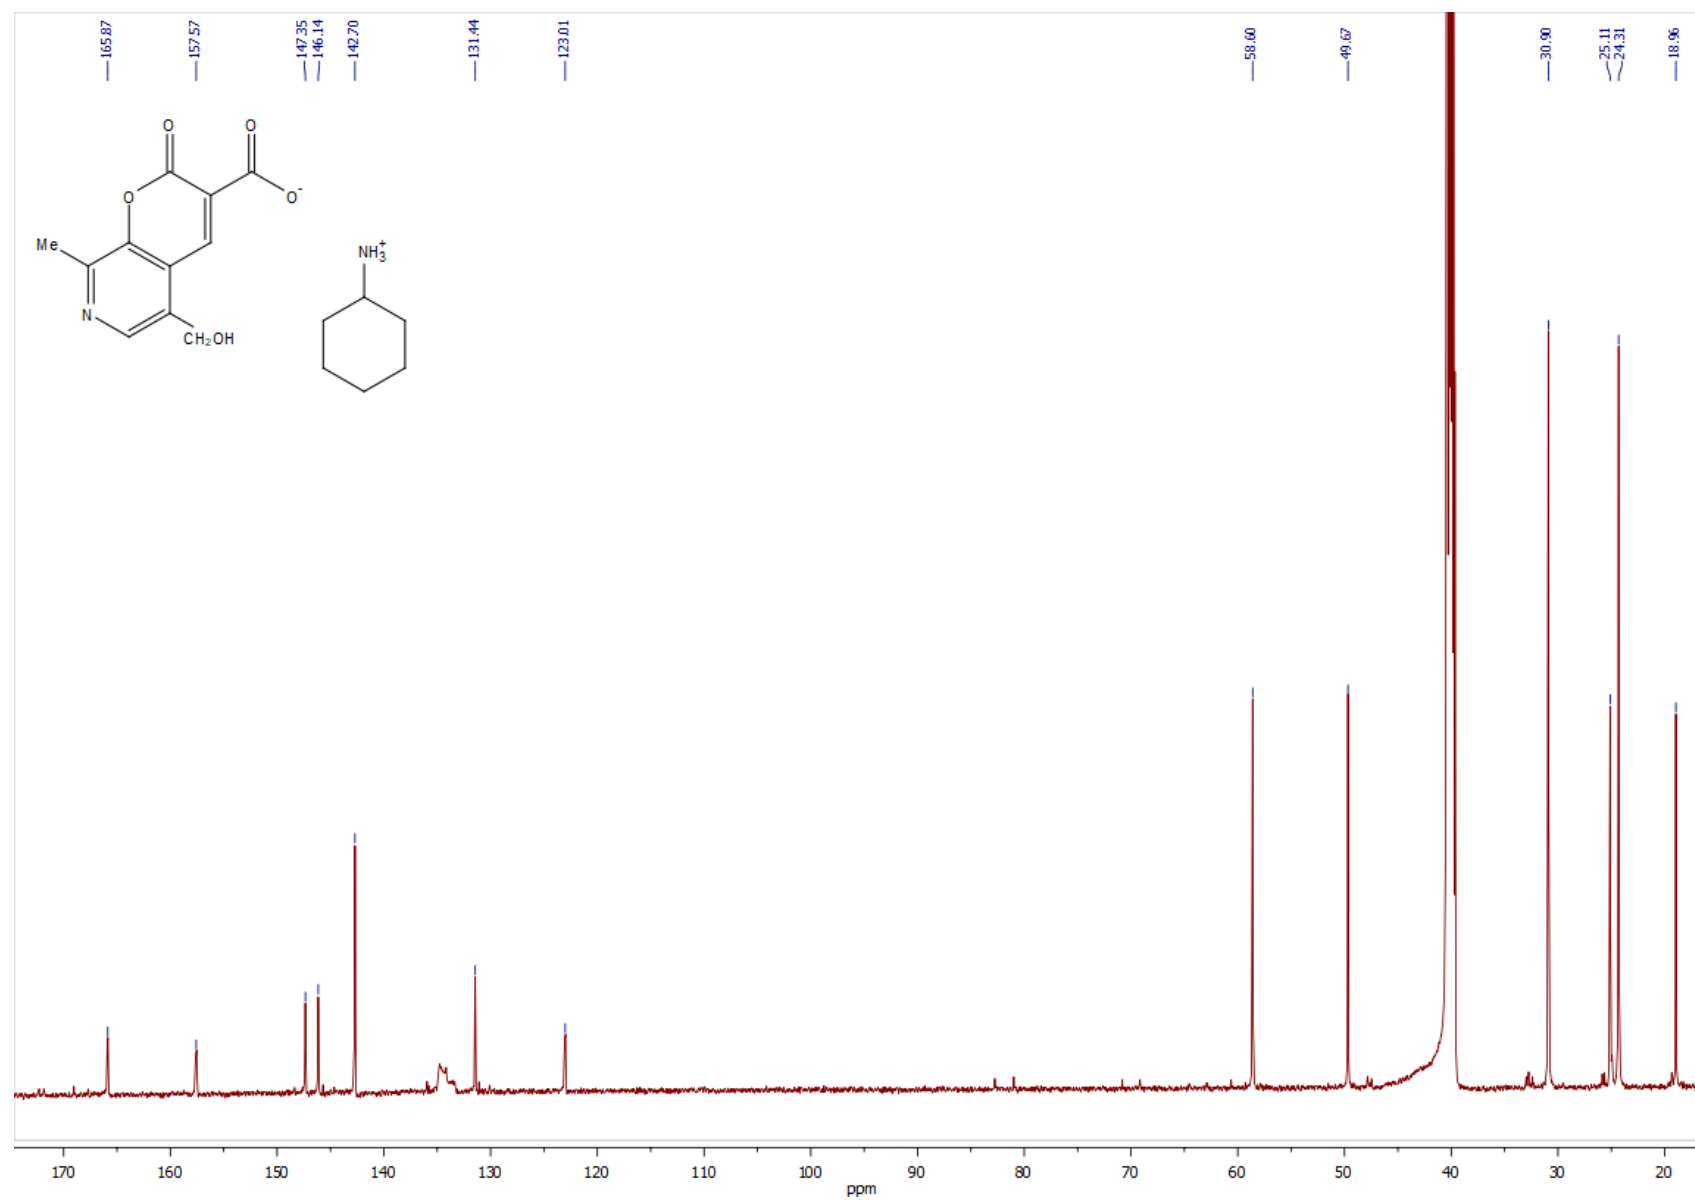

Figure S59. <sup>13</sup>C NMR spectra of the compound **8b** (600 MHz, DMSO-*d*<sub>6</sub>)

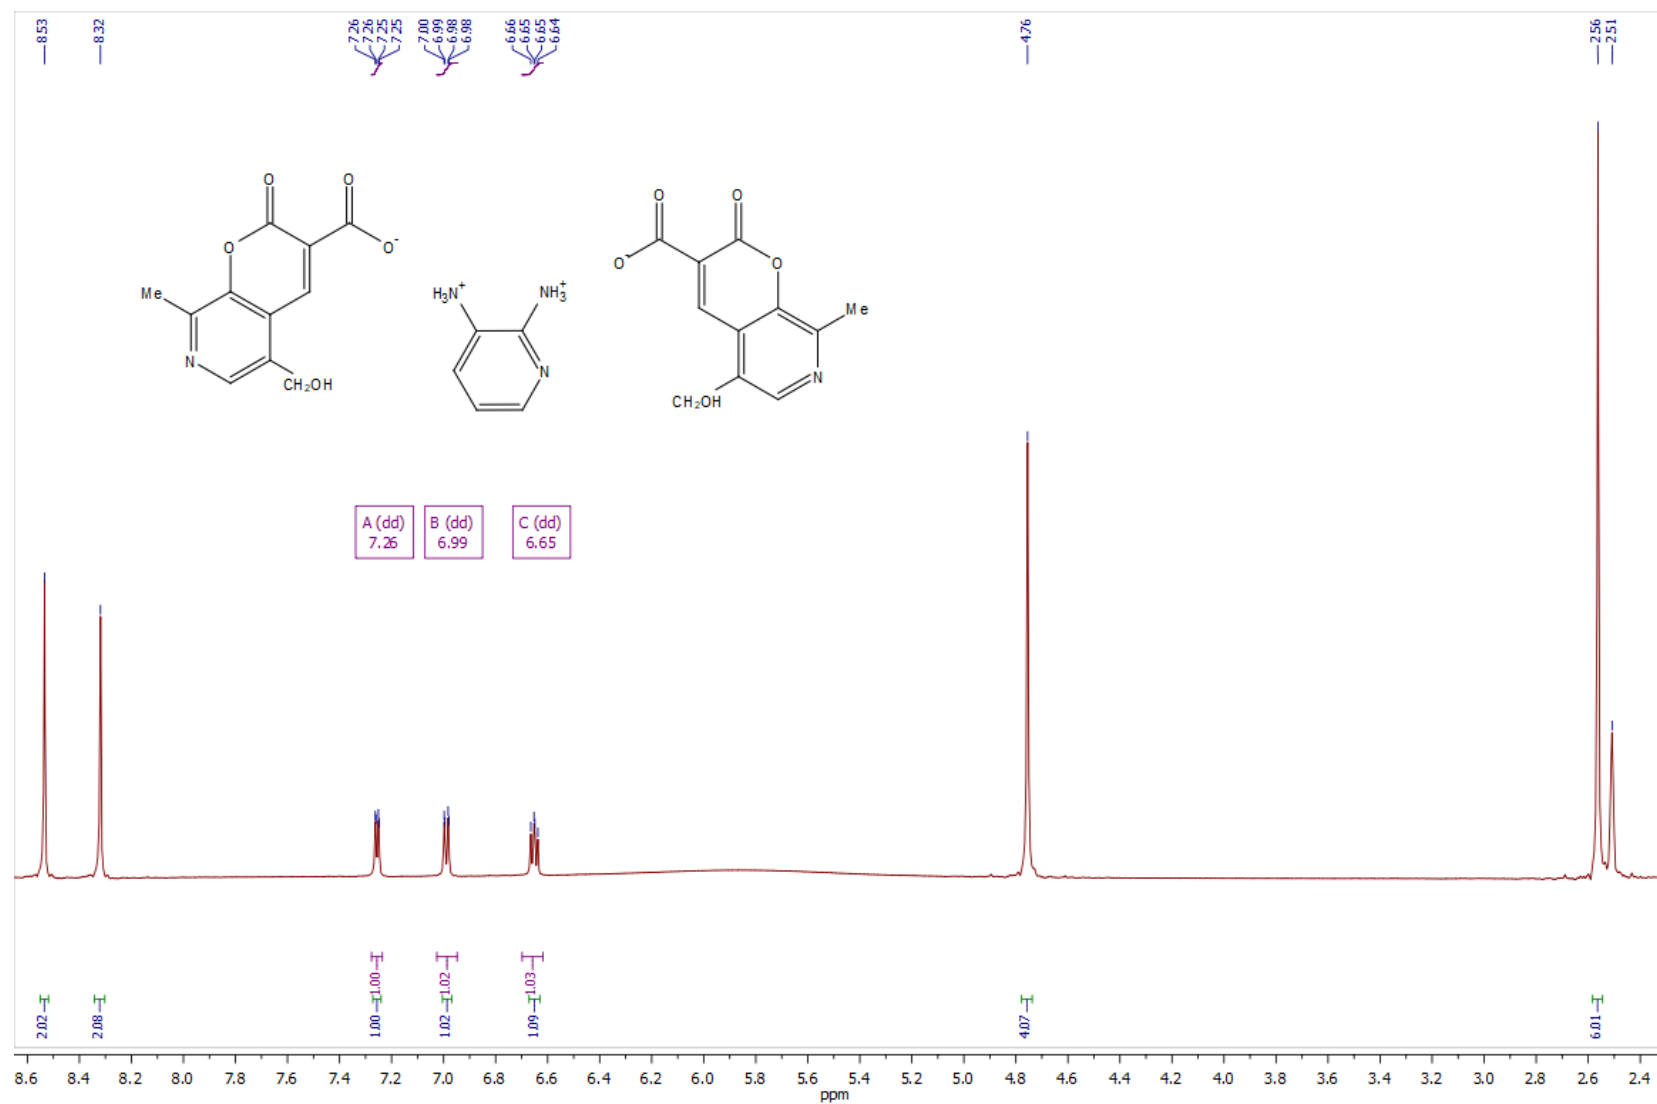

$^1\text{H}$  NMR (400 MHz,  $\text{DMSO}-d_6$ )  $\delta$  7.26 (dd,  $J = 6.0, 1.4$  Hz, 1H), 6.99 (dd,  $J = 7.7, 1.4$  Hz, 1H), 6.65 (dd,  $J = 7.6, 5.9$  Hz, 1H).

Figure S60.  $^1\text{H}$  NMR spectra of the compound **8c** (400 MHz,  $\text{DMSO}-d_6$ )

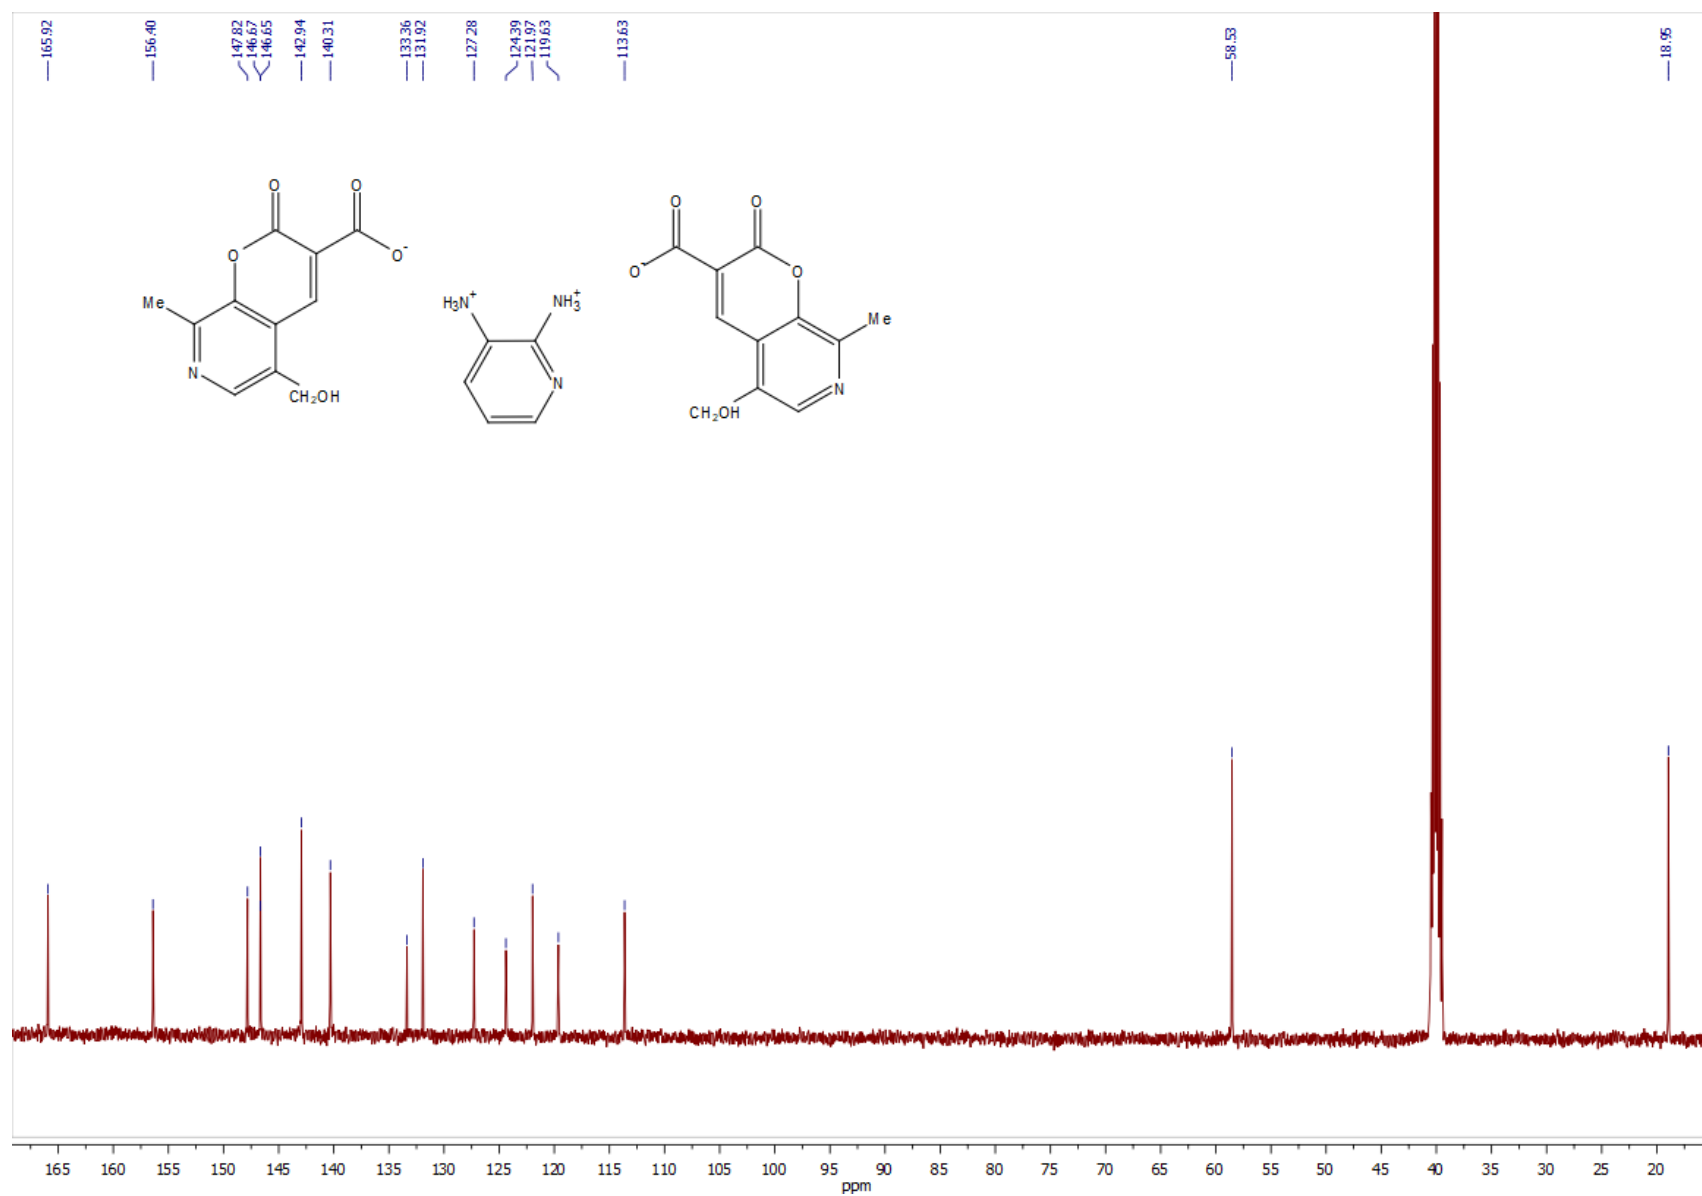

Figure S61. <sup>13</sup>C NMR spectra of the compound **8c** (400 MHz, DMSO-*d*<sub>6</sub>)

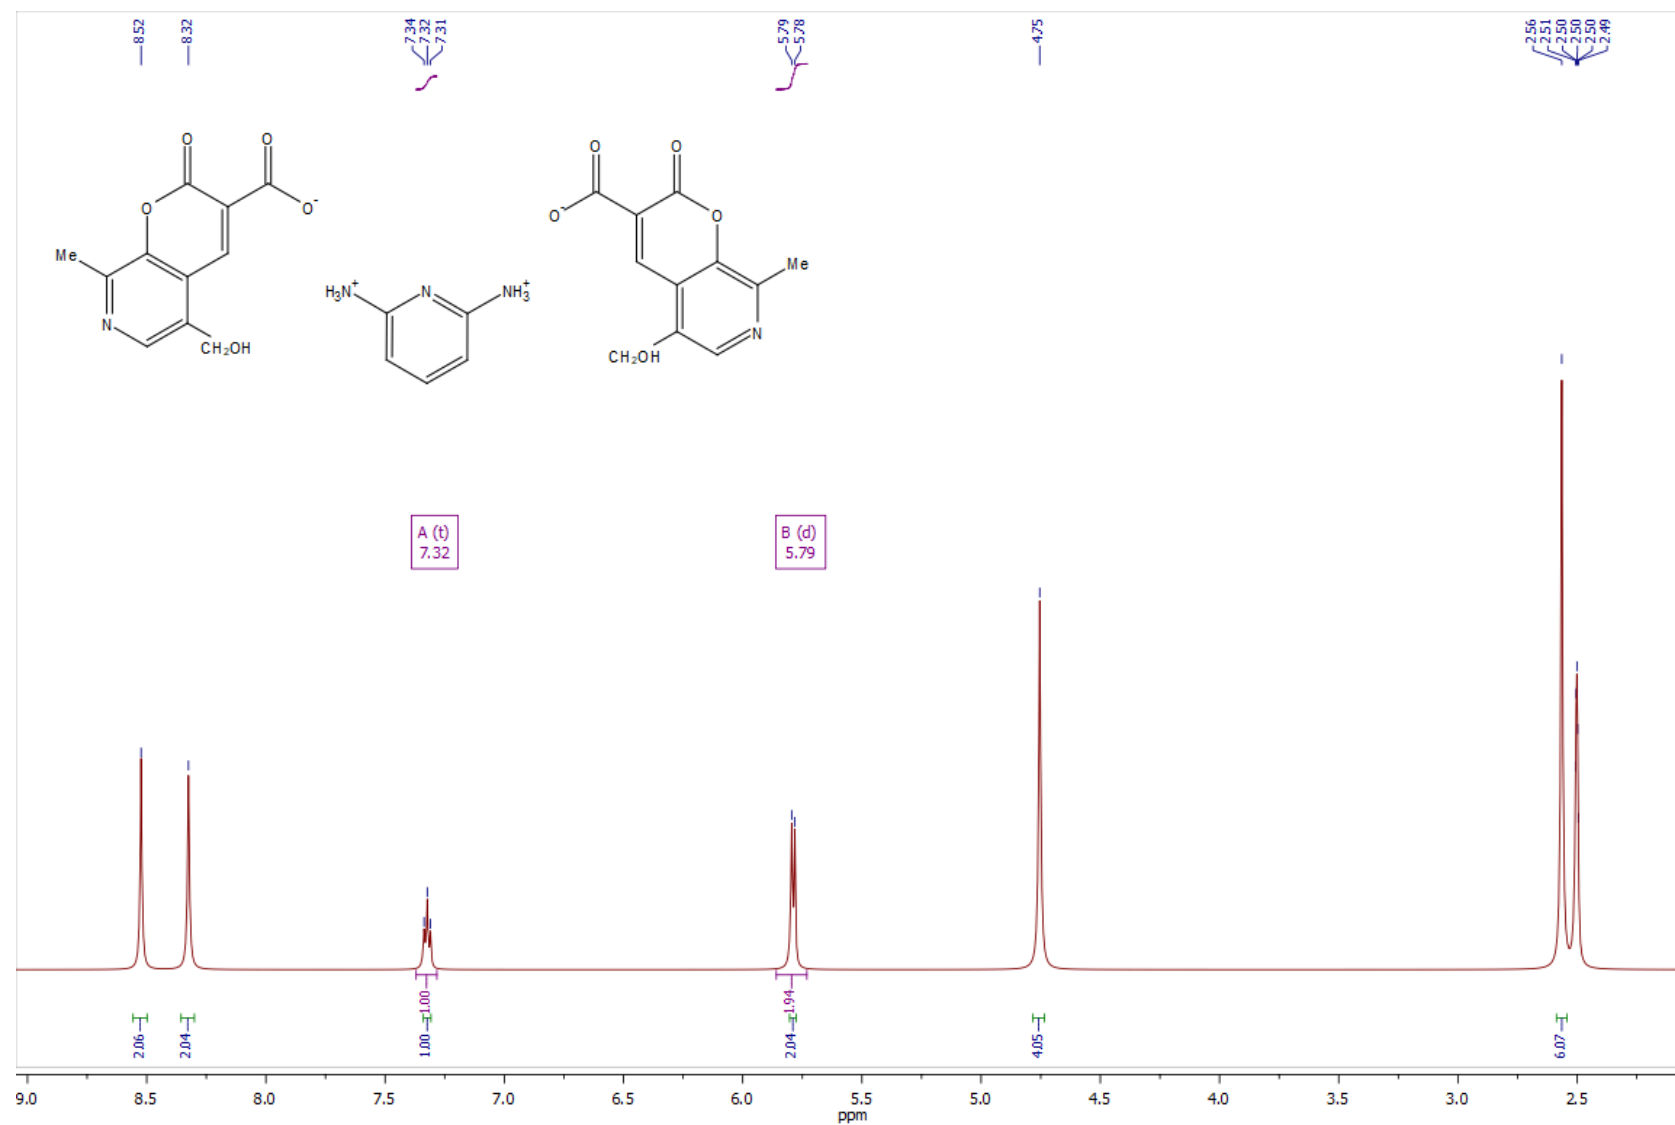

Figure S62.  $^1\text{H}$  NMR spectra of the compound **8d** (600 MHz,  $\text{DMSO}-d_6$ )

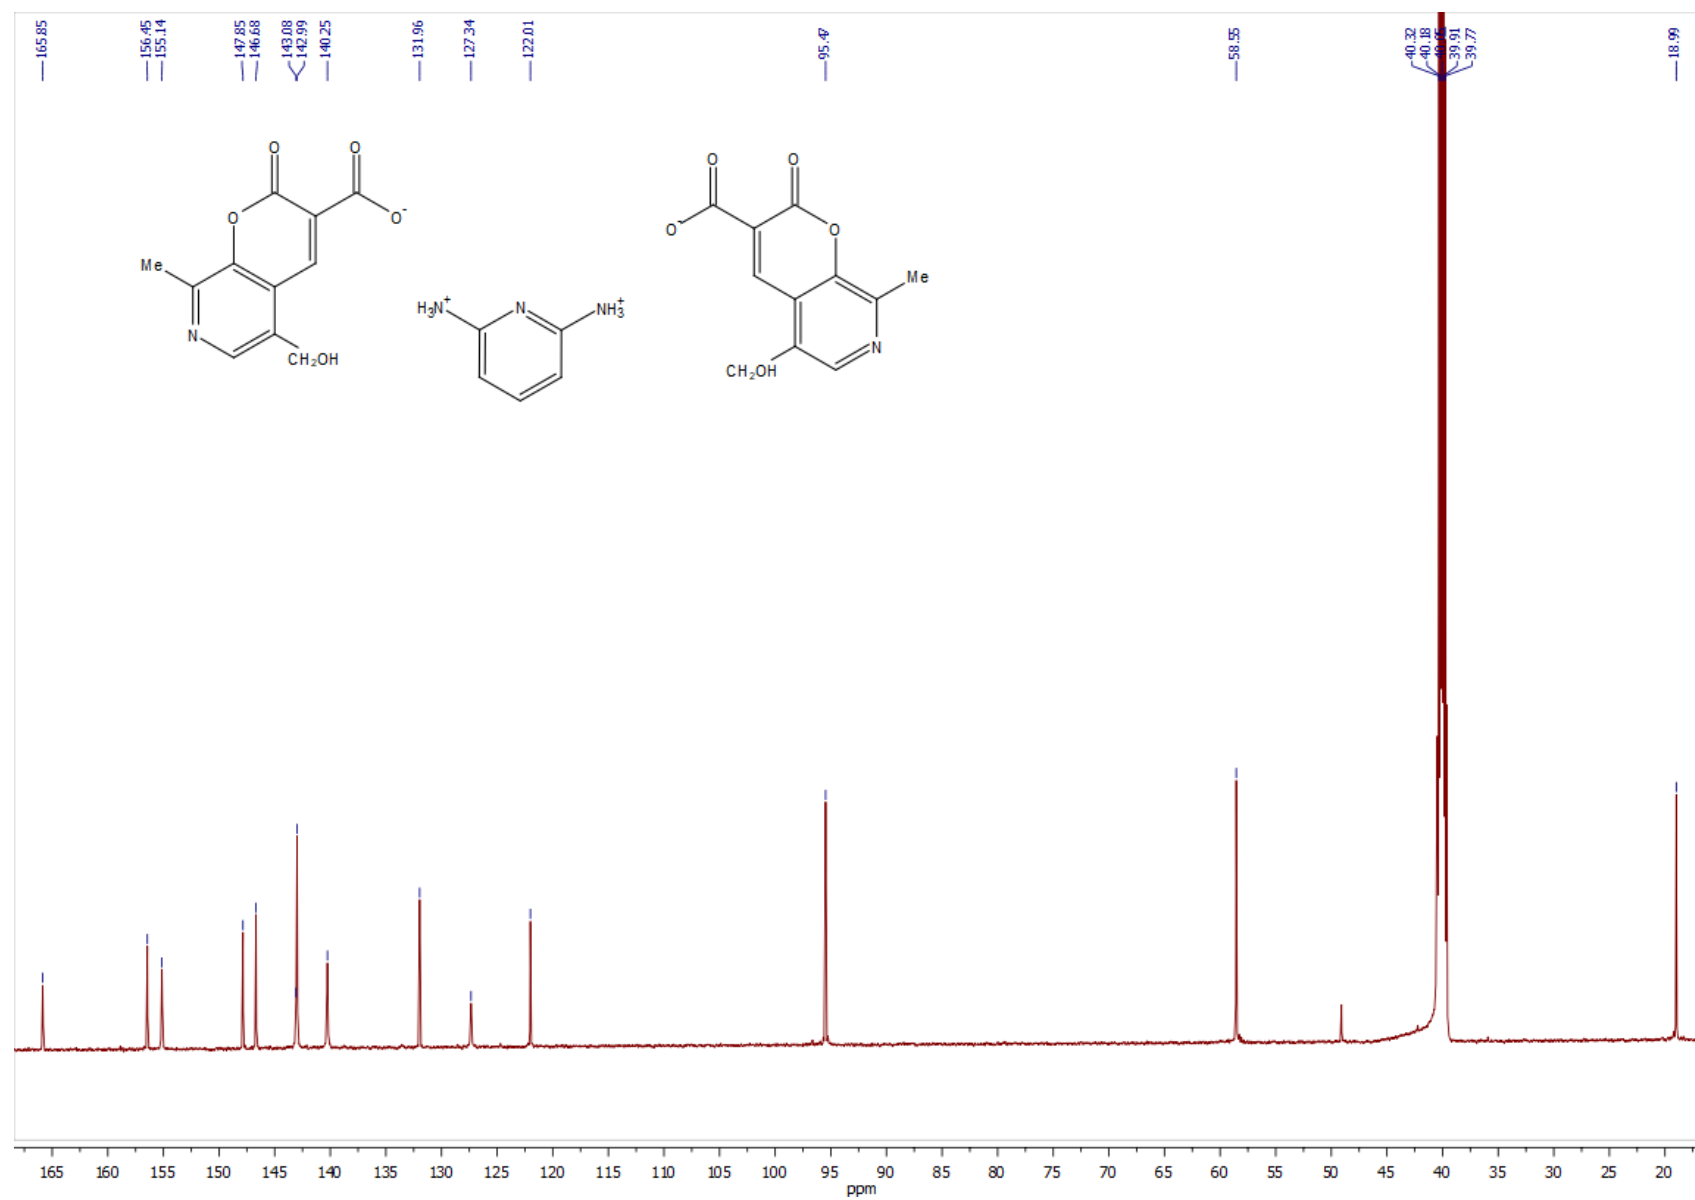

Figure S63.  $^{13}\text{C}$  NMR spectra of the compound **8d** (600 MHz,  $\text{DMSO-}d_6$ )



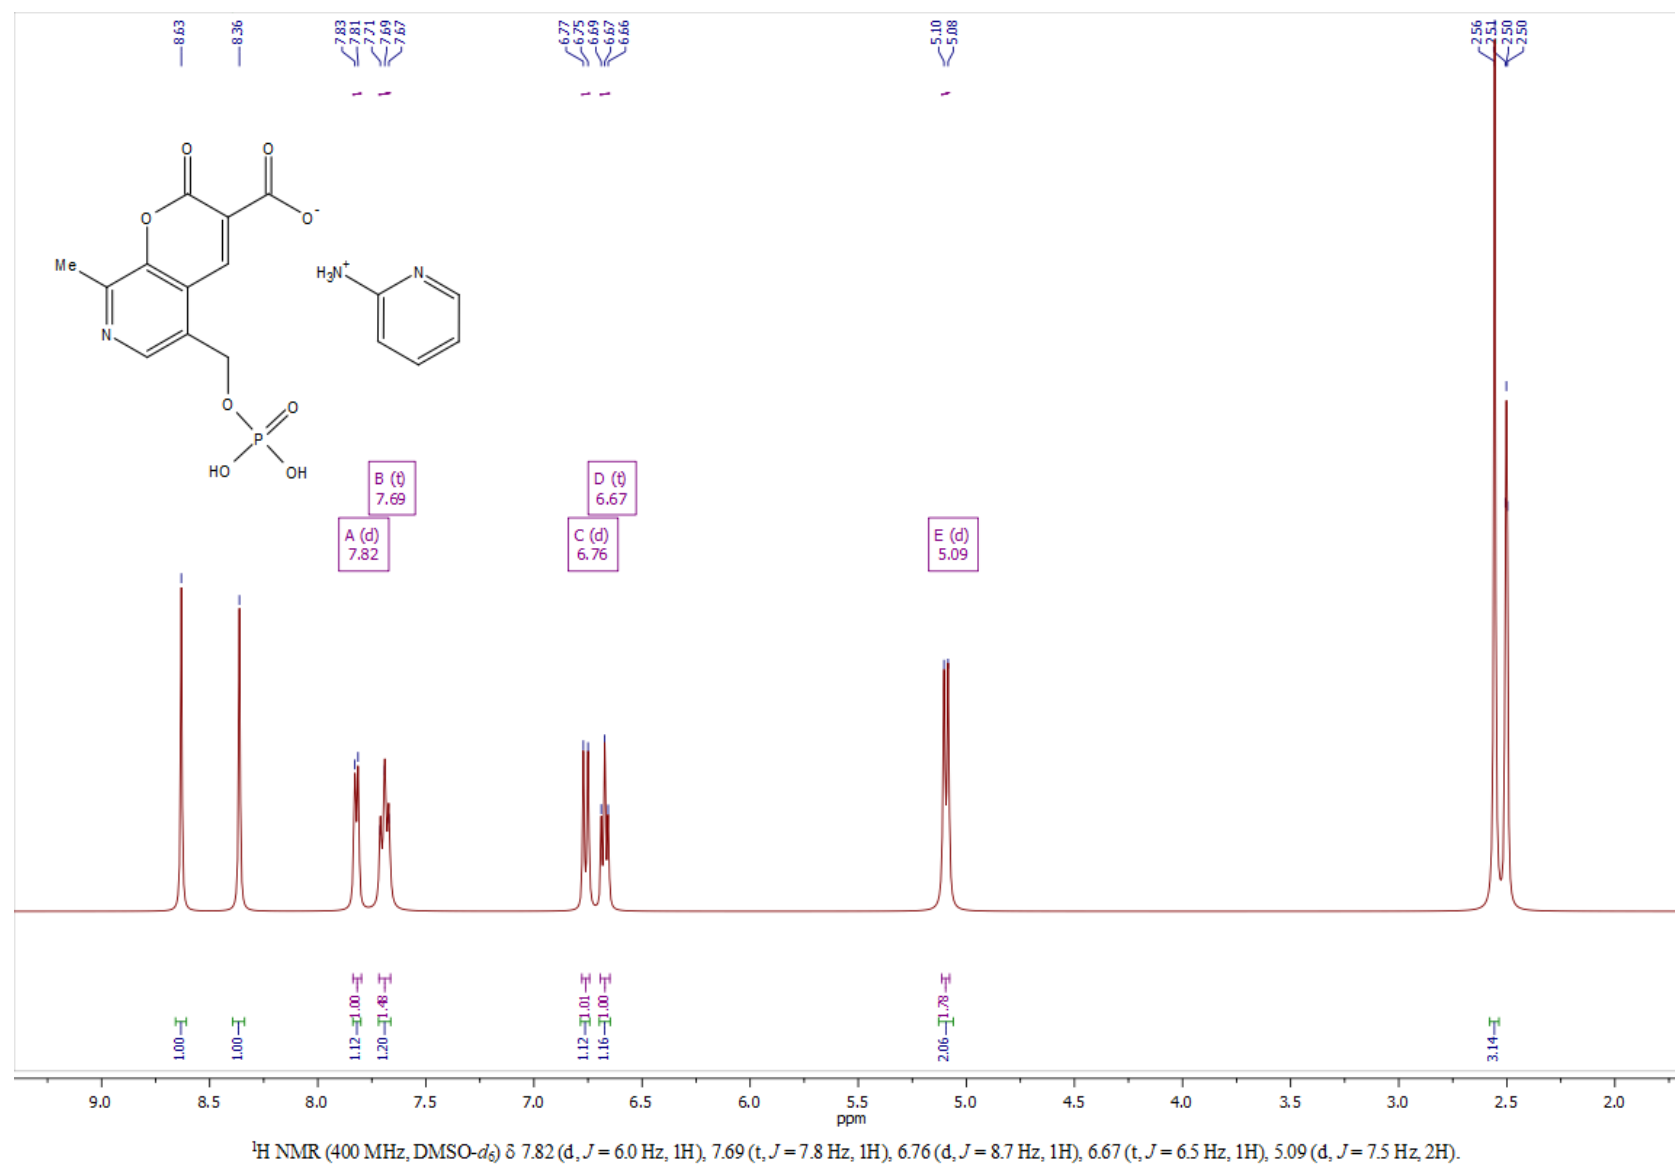

<sup>1</sup>H NMR (400 MHz, DMSO-*d*<sub>6</sub>)  $\delta$  7.82 (d,  $J$  = 6.0 Hz, 1H), 7.69 (t,  $J$  = 7.8 Hz, 1H), 6.76 (d,  $J$  = 8.7 Hz, 1H), 6.67 (t,  $J$  = 6.5 Hz, 1H), 5.09 (d,  $J$  = 7.5 Hz, 2H).

Figure S64. <sup>1</sup>H NMR spectra of the compound **8e** (400 MHz, DMSO-*d*<sub>6</sub>)

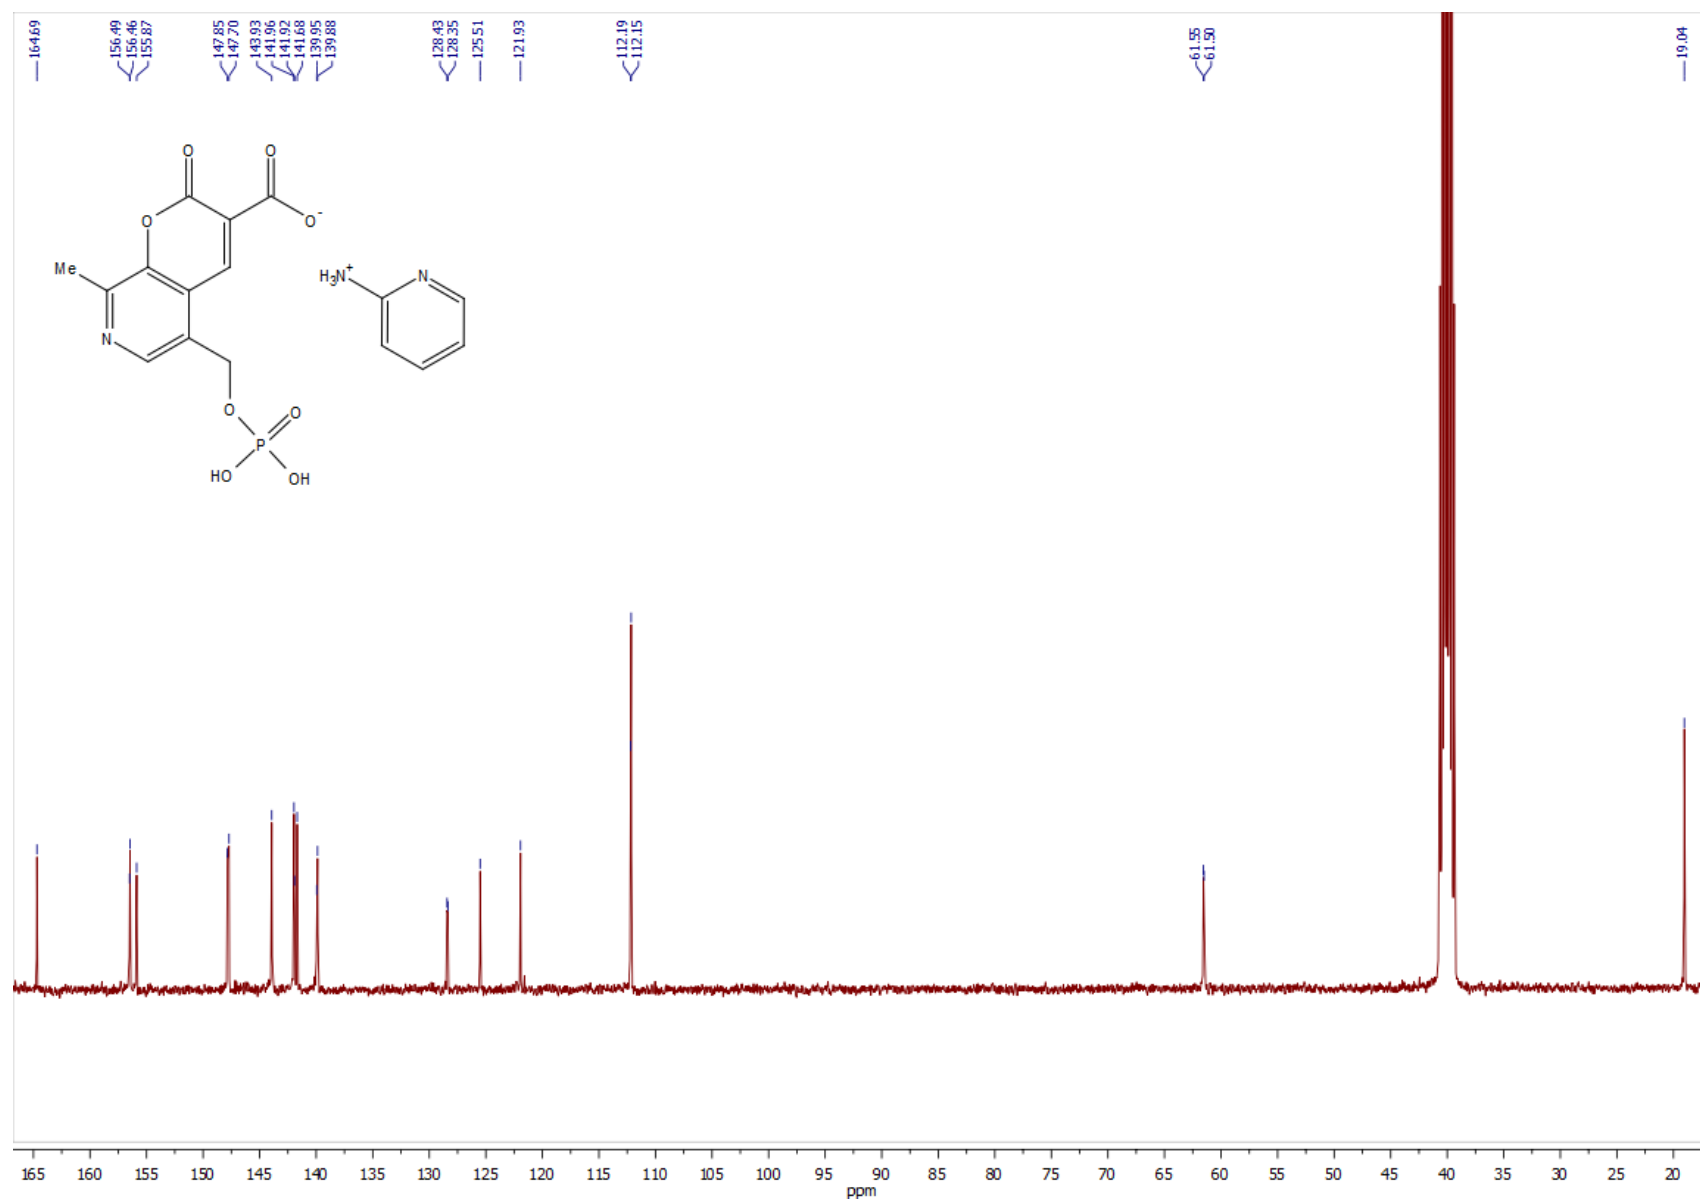

Figure S65. <sup>13</sup>C NMR spectra of the compound **8e** (400 MHz, DMSO-*d*<sub>6</sub>)

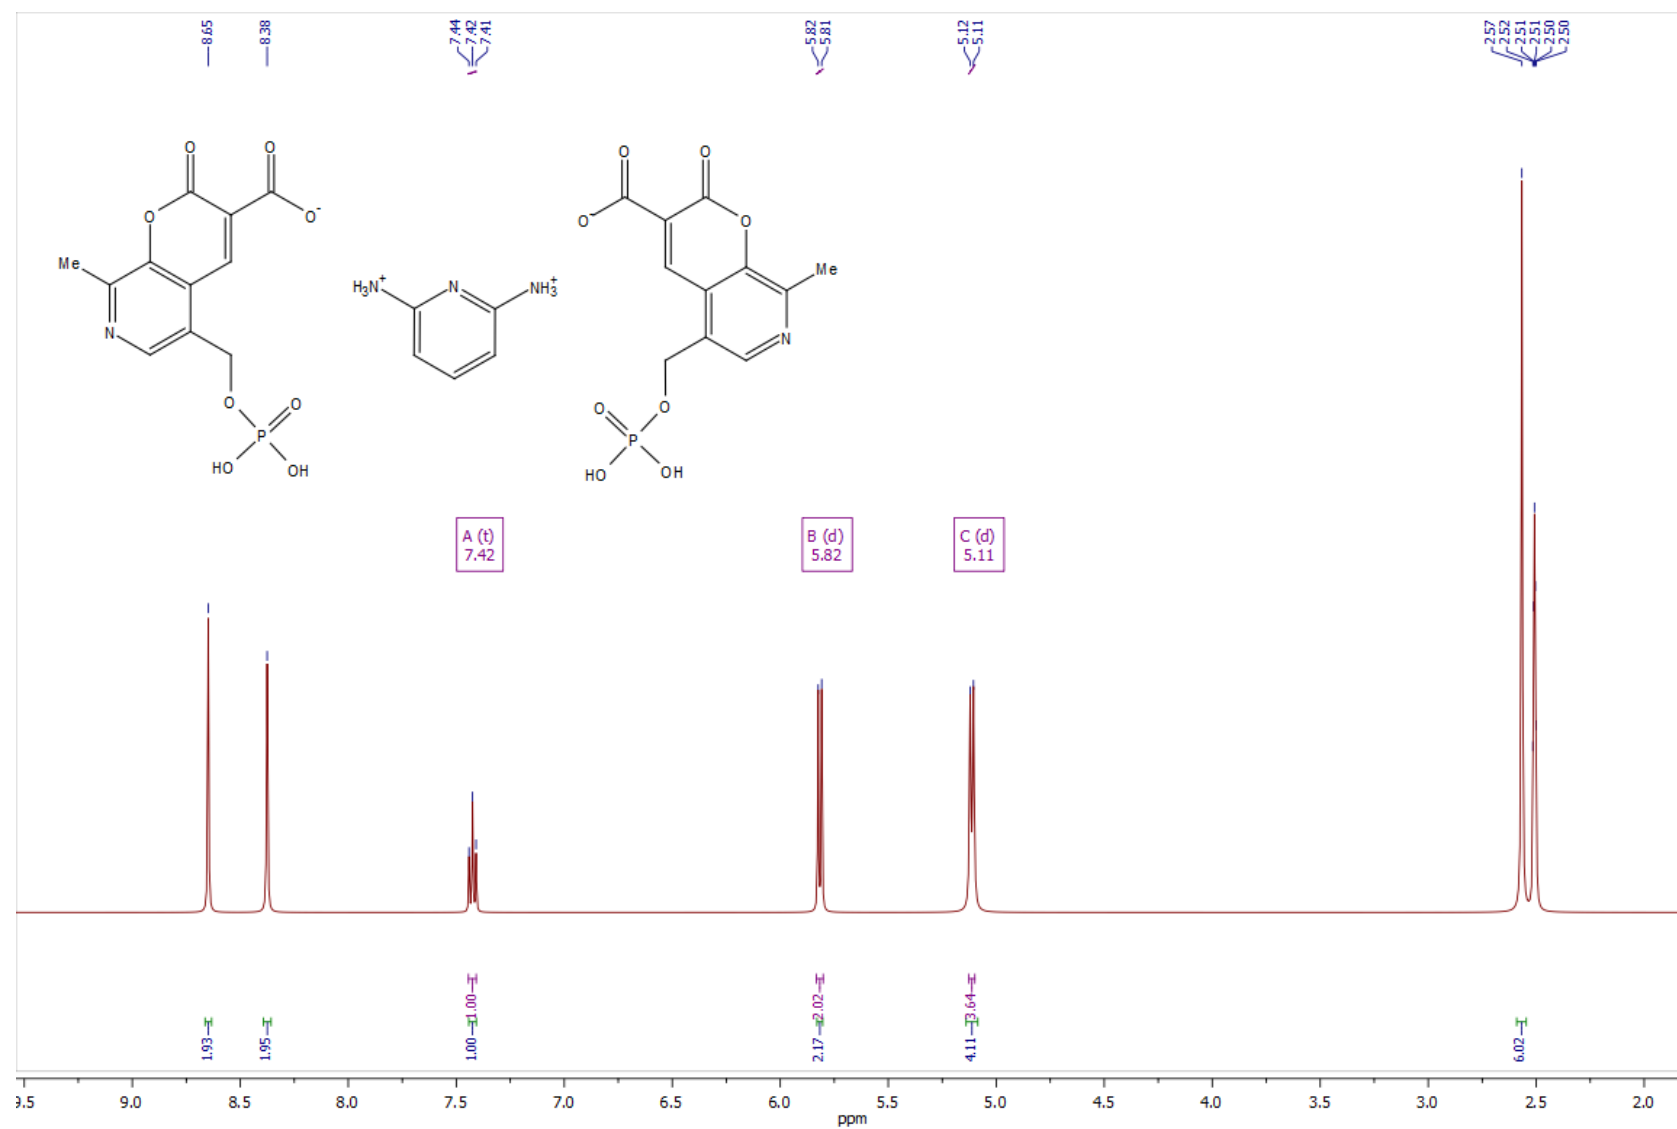

$^1\text{H}$  NMR (600 MHz,  $\text{DMSO}-d_6$ )  $\delta$  7.42 (t,  $J = 8.2$  Hz, 1H), 5.82 (d,  $J = 8.2$  Hz, 2H), 5.11 (d,  $J = 7.7$  Hz, 4H).

Figure S66.  $^1\text{H}$  NMR spectra of the compound **8f** (600 MHz,  $\text{DMSO}-d_6$ )

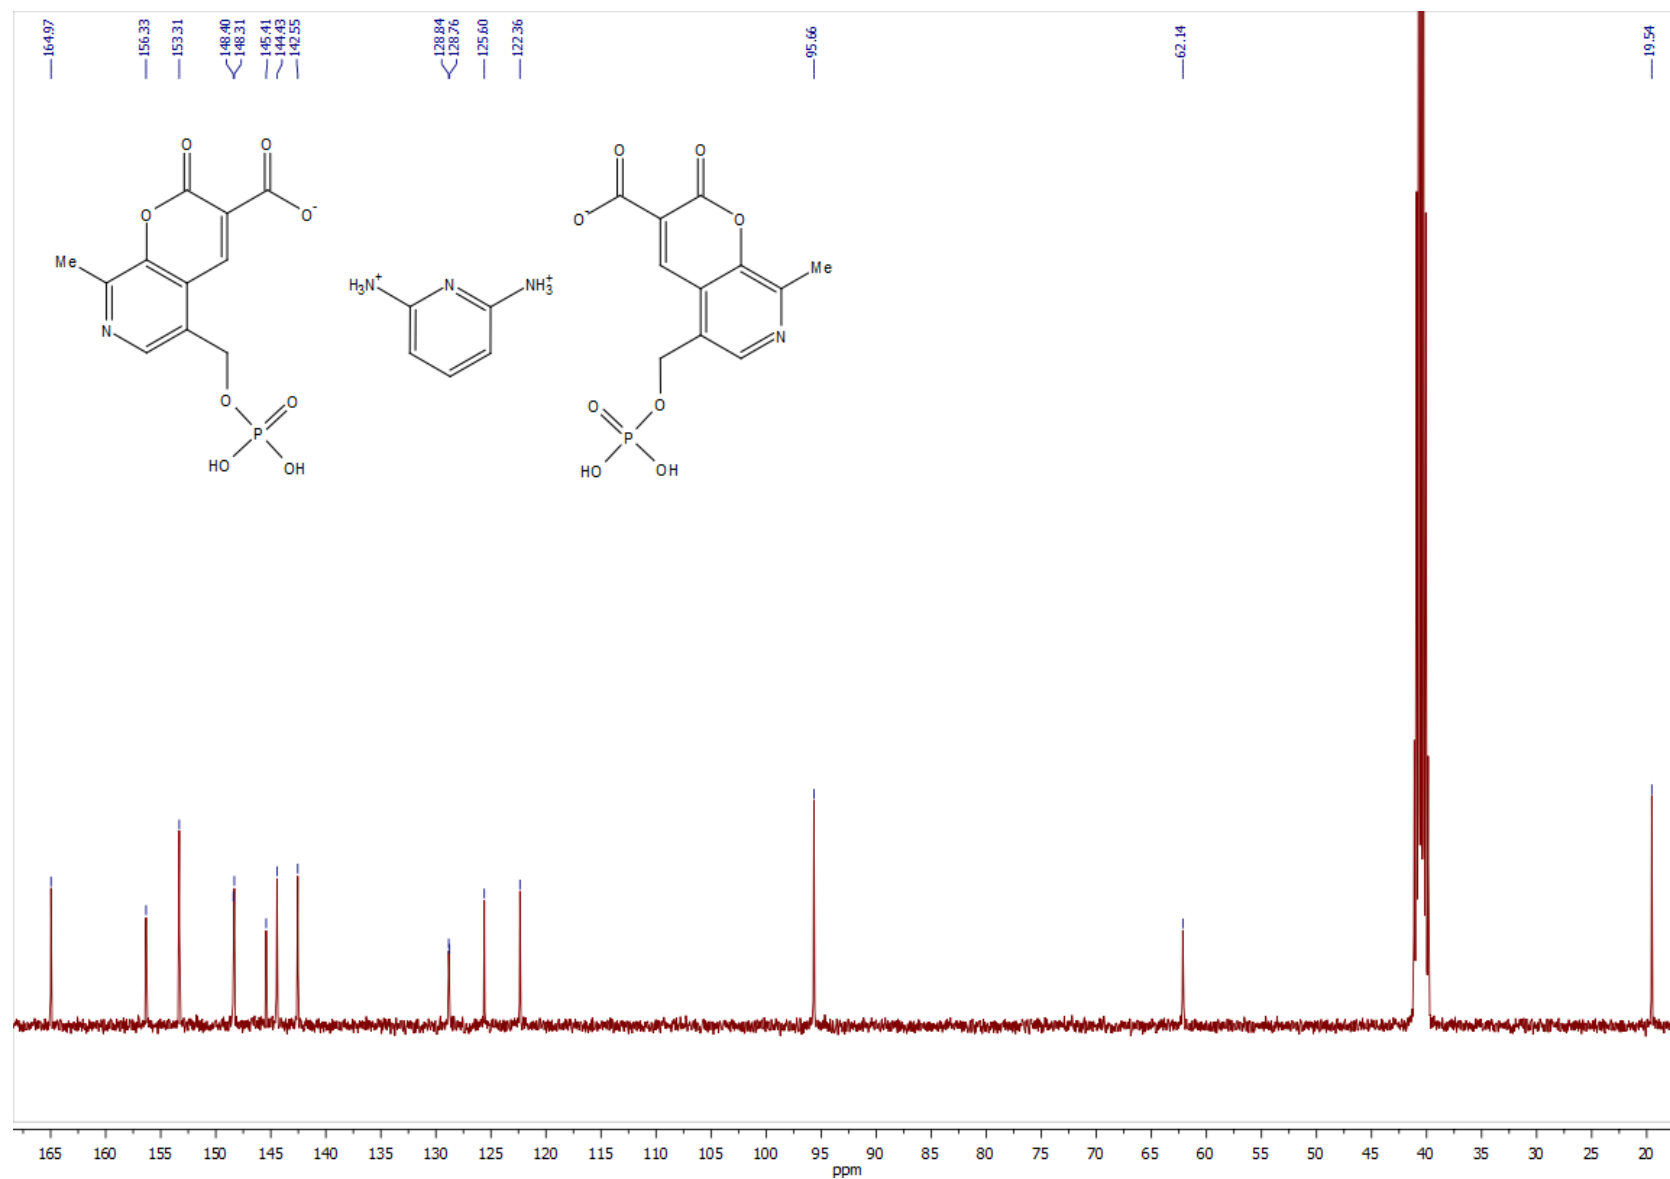

Figure S67.  $^{13}\text{C}$  NMR spectra of the compound **8f** (600 MHz,  $\text{DMSO-}d_6$ )

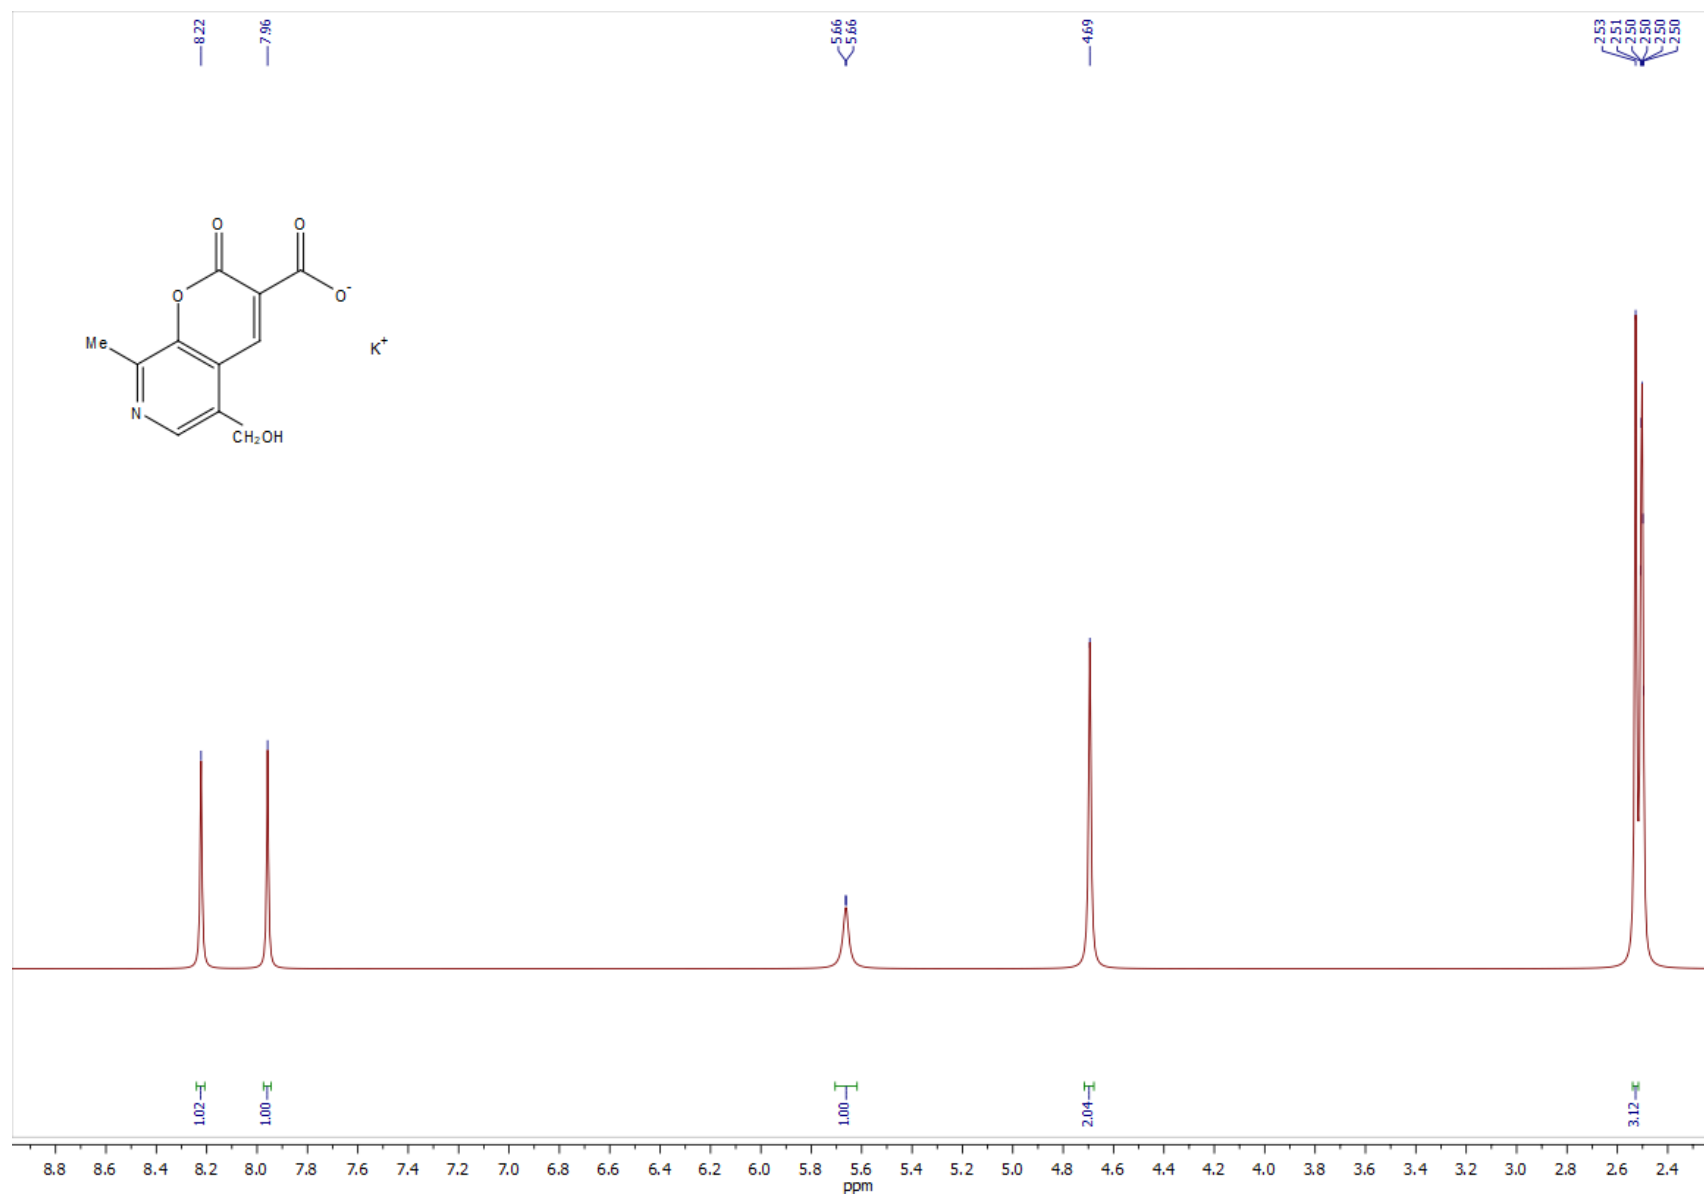

Figure S68.  $^1\text{H}$  NMR spectra of the compound **S1** (600 MHz,  $\text{DMSO}-d_6$ )

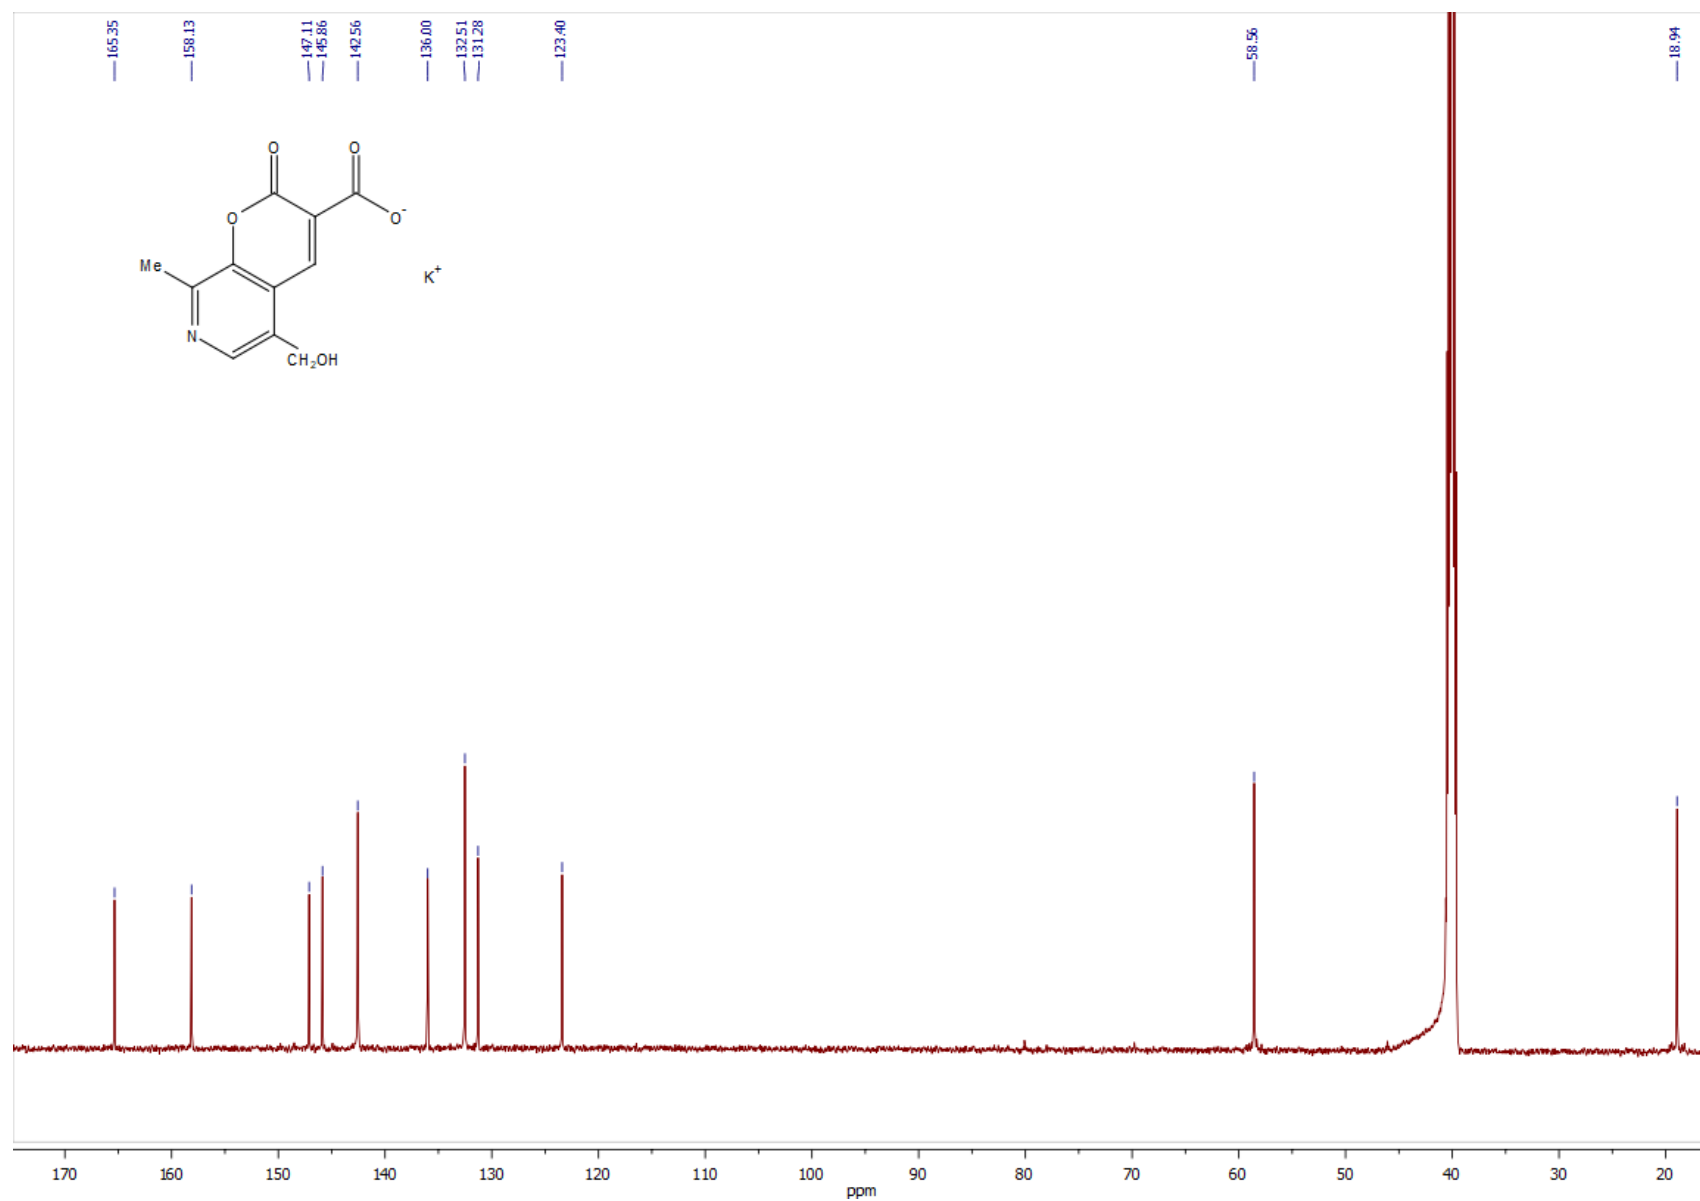

Figure S69. <sup>13</sup>C NMR spectra of the compound **S1** (600 MHz, DMSO-*d*<sub>6</sub>)
